# Supplementary material for: Mobile technology intervention for weight loss in rural men: protocol for a pilot pragmatic randomised controlled trial
Source: PubMed Central journal article supplement — BMJ Open. 2020 Apr 14;10(4):e035089. doi: 10.1136/bmjopen-2019-035089 (PMC7200044; doi:10.1136/bmjopen-2019-035089), 2020-04-14
Supplement: bmjopen-2019-035089.draft_revisions.pdf [file bmjopen-2019-035089.draft_revisions.pdf]

# BMJ Open

BMJ Open is committed to open peer review. As part of this commitment we make the peer review history of every article we publish publicly available.

When an article is published we post the peer reviewers' comments and the authors' responses online. We also post the versions of the paper that were used during peer review. These are the versions that the peer review comments apply to.

The versions of the paper that follow are the versions that were submitted during the peer review process. They are not the versions of record or the final published versions. They should not be cited or distributed as the published version of this manuscript.

BMJ Open is an open access journal and the full, final, typeset and author-corrected version of record of the manuscript is available on our site with no access controls, subscription charges or pay-per-view fees (<http://bmjopen.bmj.com>).

If you have any questions on BMJ Open's open peer review process please email [info.bmjopen@bmj.com](mailto:info.bmjopen@bmj.com)

# BMJ Open

## **MOBILE TECHNOLOGY INTERVENTION FOR WEIGHT LOSS IN RURAL MEN: PROTOCOL FOR A PILOT PRAGMATIC**

## RANDOMIZED CONTROLLED TRIAL

|                               |                                                                                                                                                                                                                                                                                                                                                                                                                                                                                                                                                                                                                                                                                                      |
|-------------------------------|------------------------------------------------------------------------------------------------------------------------------------------------------------------------------------------------------------------------------------------------------------------------------------------------------------------------------------------------------------------------------------------------------------------------------------------------------------------------------------------------------------------------------------------------------------------------------------------------------------------------------------------------------------------------------------------------------|
| Journal:                      | <i>BMJ Open</i>                                                                                                                                                                                                                                                                                                                                                                                                                                                                                                                                                                                                                                                                                      |
| Manuscript ID                 | bmjopen-2019-035089                                                                                                                                                                                                                                                                                                                                                                                                                                                                                                                                                                                                                                                                                  |
| Article Type:                 | Protocol                                                                                                                                                                                                                                                                                                                                                                                                                                                                                                                                                                                                                                                                                             |
| Date Submitted by the Author: | 17-Oct-2019                                                                                                                                                                                                                                                                                                                                                                                                                                                                                                                                                                                                                                                                                          |
| Complete List of Authors:     | Eisenhauer, Christine; University of Nebraska Medical Center College of Nursing, Northern Division<br>Brito, Fabiana; University of Nebraska Medical Center, College of Public Health<br>Yoder, Aaron; University of Nebraska Medical Center, College of Public Health<br>Kupzyk, Kevin; University of Nebraska Medical Center College of Nursing<br>Pullen, Carol; University of Nebraska Medical Center College of Nursing<br>Salinas, Katherine; University of Nebraska Medical Center College of Nursing<br>Miller, Jessica; University of Nebraska Medical Center College of Nursing, Northern division<br>Hageman, Patricia; University of Nebraska Medical Center, Physical Therapy Education |
| Keywords:                     | PUBLIC HEALTH, PRIMARY CARE, PREVENTIVE MEDICINE                                                                                                                                                                                                                                                                                                                                                                                                                                                                                                                                                                                                                                                     |
|                               |                                                                                                                                                                                                                                                                                                                                                                                                                                                                                                                                                                                                                                                                                                      |

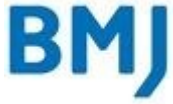

*I, the Submitting Author has the right to grant and does grant on behalf of all authors of the Work (as defined in the below author licence), an exclusive licence and/or a non-exclusive licence for contributions from authors who are: i) UK Crown employees; ii) where BMJ has agreed a CC-BY licence shall apply, and/or iii) in accordance with the terms applicable for US Federal Government officers or employees acting as part of their official duties; on a worldwide, perpetual, irrevocable, royalty-free basis to BMJ Publishing Group Ltd ("BMJ") its licensees and where the relevant Journal is co-owned by BMJ to the co-owners of the Journal, to publish the Work in this journal and any other BMJ products and to exploit all rights, as set out in our [licence](#).*

*The Submitting Author accepts and understands that any supply made under these terms is made by BMJ to the Submitting Author unless you are acting as an employee on behalf of your employer or a postgraduate student of an affiliated institution which is paying any applicable article publishing charge ("APC") for Open Access articles. Where the Submitting Author wishes to make the Work available on an Open Access basis (and intends to pay the relevant APC), the terms of reuse of such Open Access shall be governed by a Creative Commons licence – details of these licences and which [Creative Commons](#) licence will apply to this Work are set out in our licence referred to above.*

*Other than as permitted in any relevant BMJ Author's Self Archiving Policies, I confirm this Work has not been accepted for publication elsewhere, is not being considered for publication elsewhere and does not duplicate material already published. I confirm all authors consent to publication of this Work and authorise the granting of this licence.*

For peer review only

For peer review only - <http://bmjopen.bmj.com/site/about/guidelines.xhtml>



1  
2  
3 **MOBILE TECHNOLOGY INTERVENTION FOR WEIGHT LOSS IN RURAL MEN:**  
4  
5 **PROTOCOL FOR A PILOT PRAGMATIC RANDOMIZED CONTROLLED TRIAL**  
6

7 Christine M. Eisenhauer, PhD, CNE, APRN-CNS, PHCNS-BC  
8 University of Nebraska Medical Center College of Nursing  
9

10 Norfolk, NE. United States  
11

12 Fabiana Brito, PhD, MSPH, BSN  
13 University of Nebraska Medical Center College of Public Health  
14

15 Omaha, NE. United States  
16

17 Aaron Yoder, PhD  
18 University of Nebraska Medical Center College of Public Health  
19

20 Omaha, NE. United States  
21

22 Kevin Kupzyk, PhD  
23 University of Nebraska Medical Center College of Nursing  
24

25 Omaha, NE. United States  
26

27 Carol Pullen, EdD, RN  
28 University of Nebraska Medical Center College of Nursing  
29 Omaha, NE. United States  
30

31  
32 Katherine Salinas, RN, BSN  
33 University of Nebraska Medical Center College of Nursing  
34 Omaha, NE. United States  
35

36  
37 Jessica Miller, RN, BSN  
38 University of Nebraska Medical Center College of Nursing  
39 Norfolk, NE. United States  
40  
41

Patricia Hageman, PT, PhD, FAPTA,  
University of Nebraska Medical Center College of Allied Health  
Omaha, NE. United States

**Corresponding Author:**

Christine Eisenhauer 49 801  
East Benjamin Avenue,

Norfolk, NE 68701

[ceisenhauer@unmc.edu](mailto:ceisenhauer@unmc.edu); 402-844-7897

Word Count: 3753

Page 3 of 46

**ABSTRACT**

**Introduction:** Overweight-obese men in the rural Midwest are an unrepresented, at-risk group exhibiting rising rates of cardiovascular disease, poor access to preventive care, and a rural culture that contributes to sedentary lifestyle and unhealthy diet. Self-monitoring of eating and activity has demonstrated efficacy for weight loss. Use of mobile technologies for self-monitoring eating and activity may address rural men's access disparities to preventive health resources and support weight loss.

**Aim:** To use a pragmatic randomized controlled trial with community-engaged approaches to support rural men with weight loss.

**Methods and analysis** Six-month feasibility pilot randomized controlled trial with contextual evaluation will determine the feasibility and acceptability of a smart phone self-monitoring app enhanced with discussion group (Lose-It Premium), short message service (SMS) text-based support, and Wi-Fi scale intervention (MT+) for achieving weight loss among rural, midlife men (age 40-65). We seek to determine preliminary efficacy of MT+ (n=40) to a comparison group 19 receiving only a self-monitoring app (Lose-It Basic) (MT; n=40) in achieving the outcomes of weight loss (kg and % body weight-primary) and improved dietary and physical activity (PA) behaviors (secondary) at 3 and 6 months post-baseline. Statistical analysis will evaluate trial 23 feasibility, preliminary efficacy of outcomes, and community capacity. Descriptive content 24 analysis will evaluate intervention acceptability and contextual sensitivity.



25 **Ethics and dissemination** Protocol approved by the University of Nebraska Medical Center

26  
27 Institutional Review Board (IRB# 594-17-EP). Dissemination of findings will occur through 28  
ClinicalTrials.gov, local and scientific dissemination.

29 **Registration details**

30 ClinicalTrials.gov ID: NCT03329079; Pre-results

31 Protocol version 10, study completion date 8-31-2020

32 Roles and Responsibilities Funder: NIH/NINR Health Disparities Section 1R15NR017522-01

33  
34  
35 **KEYWORDS** rural population, mobile health technologies, men, weight loss, health disparities, 36  
self-monitoring, eating, activity

37  
38 **ARTICLE SUMMARY**

39 Intervention Addresses Rural Access Disparity: Real time self-monitoring support through  
40 messaging, an app-based discussion board, and smart-scale seeks to address men's access 41  
barriers to information and social support while being sensitive to context. If successful,  
this 42

43 intervention has potential to improve rural men's access to weight management resources.

44  
45 Community-Engaged Intervention Development: Community-engagement through use of a 46  
community advisory board, local student nurse outreach, and participants' interview feedback  
47 supports cultural refinement of the intervention.

48  
49  
50 Data Collection Methods: Multiple methods (app analytics, focus groups, anthropometrics, and 51  
survey data) are used to address the research aims supporting the contextual sensitivity of the  
52 intervention.

53  
54  
55  
56  
57  
58  
59  
60  
  
1  
2  
3 Probabilistic Generalizability: The sample size is justified as a pilot feasibility trial. The results 4  
5 of this study will be used to update the power analysis for a future fully powered study and 6  
inform the logical feasibility of the intervention for rural men.

## STRENGTHS AND LIMITATIONS

- This study expands previous research using mobile apps to include community tailoring of the 10 recruitment and intervention approach specific for rural men.
- The combination of community-engaged approaches with a pRCT design delivers a weight loss 12 intervention that facilitates local buy-in and is sensitive to context.
- Lack of masking in pRCT presents opportunity for sensitivity analyses that may quantify the 15 impact of bias on study outcomes.
- Components of the real-world comparator are included in the expanded, more comprehensive intervention.

### Acknowledgement:

The authors would like to acknowledge the Rural Men's Health Study Community Advisory 22 Board and UNMC Northern Division student nurses for contributions to recruitment outreach and contextual tailoring of the intervention. 24

## INTRODUCTION

### Background and rationale

<sup>1</sup> Rates among midlife and older  
Over 55 million American men are  
overweight or obese.  
men residing in midwestern states have tripled  
in the past 20 years, with 39% of men  
overweight  
or obese.<sup>2-3</sup> Rural men report overall poorer  
health than urban men.<sup>4</sup> Their obesity status  
predisposes high risk for metabolic syndrome  
and cardiovascular disease.<sup>5-6</sup> Historically,  
rural  
men were less likely to be overweight and  
obese due to the high levels of physical  
activity (PA)  
involved in agricultural occupations.  
Recently, the mechanization of agriculture has  
shifted 34 men's work roles to more  
sedentary, technology-driven lifestyles,  
increasing the likelihood of 35

developing overweight/obesity.

Mobile health applications such as messaging, apps and other interfaces available via  
mobile phone have demonstrated improvement in health behavior change for weight loss among  
adults<sup>7-9</sup>, and in some hard-to-reach minority populations.<sup>10</sup> The benefit that mobile technologies  
may hold for engaging hard-to-reach rural men for weight loss is unknown, as few studies exist  
to date.

42<sup>11</sup>, attempt

43 weight loss, or participate in weight loss programs. Men, when compared to women, are less likely to use weight control practices<sup>12-14</sup> Poor access to weight loss resources is

44

45 one reason.<sup>15</sup> Rural men also tend to exhibit dominant masculine norms,<sup>16</sup> which view help46 seeking behaviors and health promotion strategies as feminine and weak.<sup>6, 16</sup> Health promotion

47 activities oriented to rural men's work roles are preferred.<sup>17</sup> Therefore, a weight loss intervention

48 whose content is adapted to the local norms, is accessible through the privacy of a smartphone,

49 and communicated in an acceptable tone is critical. The Rural Men's Health Study plans to 50

51 address the current gaps in knowledge by delivering a contextually sensitive weight loss 52

intervention that is feasible to the rural environment and acceptable to participants.

53

### **Aims**

54 We aim to 1) determine the feasibility and acceptability of a mobile technology enhanced

55 self-monitoring intervention (MT+) for achieving weight loss in routine care of

overweight and 56

57

58

59

60 Page 5 of 46

1

2

3 obese men in the rural communities, 2) determine preliminary efficacy of the MT+ intervention 4

5 in comparison to a basic self-monitoring app only (MT) in achieving weight loss (primary), and

6 improved dietary and PA behaviors (secondary) at 3 and 6 months post-baseline, and 3) 7

determine quantitative and qualitative indicators of community capacity (resource mobilization,

8 partnership linkages) to support a relevant weight loss intervention for rural men.

9

10

## **METHODS AND ANALYSIS**

11

### **Design overview**

12

13 We propose a pilot, feasibility, pragmatic randomized controlled trial (pRCT) with an allocation

14 ratio of 1:1. We will randomize 80 men into two groups: intervention and comparison. A pRCT

15 is selected to maximize assessment of men's variations in treatment availability option (free 16 comparator app) and in behavior and adherence while examining benefit and drawbacks that 17 <sup>18 19</sup> Hertzog<sup>18</sup> suggested

that 30 participants per group in a

18 occur in the real-world rural setting.

19

20 pilot study is a sufficient sample size for aims involving between group differences and if the

21 results are to be used to estimate the needed sample size for a future, fully-powered study. As 21 weight loss studies in rural men are a gap in the current literature it is important that we obtain 22

23 reliable estimates of effect size with which to perform a power analysis for subsequent research. 24  
So 30 participants per group will be needed, for a total of 60. Some participants will likely not 25 complete  
the study, so we will enroll 80 men to allow for up to a 25% attrition rate. Participants  
26 will complete assessments at baseline, 3 and 6-months post-baseline.  
27

## 28 **Public and patient involvement**

29 Community engagement was used to inform the development of this protocol  
involving

30 health professions students and a community advisory board (CAB). The CAB  
members 31

32 represent the rural sampling region (i.e., farmers, insurance and machinery dealers, extension  
33 staff, and community health workers) and meet quarterly to inform the study approach, material  
34 content and imaging, targeted venues for social marketing, dissemination of recruitment  
35 materials, and the direct referral of eligible participants. The funder requires student involvement  
36 in study activities. We are involving students in planning, implementation, and evaluation of  
37 community outreach and recruitment strategies. Participants were not involved in any of the 38  
39 recruitment of this study.  
40

## 41 **Participants, interventions, and outcomes**

42 Participant eligibility

43 Inclusion criteria: 1) man age 40-69, 2) reside (majority of the time) in Northeast

44 Nebraska, United States (RUCA code 4-10), 3) BMI of 28 (kg/m<sup>2</sup>) or higher and weight not 45  
greater than 396 pounds (BMI 50 or higher with clinician clearance), 4) smartphone owner with 46  
47 enabled messaging, 5) email account, 6) answer “no” to all questions on the PAR-Q17 health  
48 history assessment or are willing to get physician evaluation prior to enrolling, and 7) willing to  
49 share Lose-It! self-monitoring logs with the investigative team, and attend three assessment visits  
50 at the health department. Exclusion criteria: 1) recently lost 5% or more body weight, 2)  
51 currently taking medications that cause or are influenced by weight loss, 3) used weight loss app 52 in  
the past to lose weight, 4) person from same household is enrolled in study, and 5) Type I  
53 diabetes or Type II diabetes with insulin dependence.  
54  
55

56 Intervention group  
57  
58  
59  
60

1  
2  
3 *Self-Monitoring*

4

5 MT+ will receive the Lose-It! Premium app, Withings© Body+ Composition smart scale, 6 daily  
7 SMS messages, technology support, and a private group discussion board within the app. In

7 addition to the self-monitoring, the premium version permits enhanced customization of  
8 goal

8 setting, app-automated self-monitoring reminders, and customized email reports of  
9 self

10 monitoring trends important in supporting motivation and confidence during periods of

11 behavioral inaction. The smart scale will provide automated recording of weight synced to the

12 app., permitting immediate feedback, virtual rewards (i.e. badges for achievements) and visual

13 maps of weight trends. The participant will be instructed in how to sync the scale with their 14

15 smartphone at baseline. They will be instructed to weigh themselves daily at home on this

16 scale which will automatically update to their app after each weighing.

17

### 18 *Social Support*

19

20 MT+ participants will be enrolled in a private, closed-group discussion board created  
21 and moderated by the research team. The discussion board will provide social support to MT+  
22 participants while completing the trial to promote long-term success.<sup>11, 12</sup> The discussion board  
23 will also provide opportunity for social comparison of others' self-monitoring experiences  
24 providing a mechanism to influence judgment and behavior change towards one's own self-  
25 monitoring. The groups will be incentivized by a male moderator who will administer peer 26  
27 challenges weekly (see Appendix I) and will also respond to questions. Participants will also be 27  
28 encouraged to post weekly about their own successful strategies and progress reports related to 29 their  
29 self-monitoring for weight loss.

30

### 31 *Text messaging*

32 A message library (see Appendix II) will be developed by the team based upon messaging  
33 content that has demonstrated usefulness for behavior change<sup>20-23</sup> and preferred by men.<sup>22, 24, 25</sup> 34

35 Message content will include a variety of topics including reminders, eating and physical activity 35  
36 behaviors to be enacted and avoided, self-monitoring portion control, strategies for overcoming  
37 weight loss barriers, and health living challenges. Content will be adapted from healthy eating  
38 and physical activity promoting resources that include USDA Choose My Plate<sup>26</sup> and CDC and  
39 Prevention: Physical Activity<sup>3</sup>. PA includes targeted aerobic PA, monitoring of body weight,  
40 behaviors needed to sustain weight loss, promoting success and rewarding oneself, preventing  
41 failure, and avoiding temptations.<sup>13</sup> CAB members will inform and review the content of the  
42 messages for local relevance prior to dissemination to the participants. An online automatic 43  
44 service (Remind.com©) will be used to send the free messages to participants twice per day on 45  
45 Monday, Wednesday, and Friday at 8am and 11:00am, and once per day on Tuesday, Thursday,  
46 Saturday, and Sunday at 8am.

47

### *Troubleshooting support and re-engagement prompt*

MT+ participants will have access to a 24-hour technology troubleshooting support from the investigative team via phone or text. The participant's food, activity, and weight log will be accessed once weekly by the investigative team to monitor adherence. If dietary intake, PA, or weight are not logged for greater than five days, he will receive a reminder text and phone call.

### Comparison group

Page 7 of 46

1  
2

MT group of men will receive the Lose-It! Basic app. The basic app permits real-time self-monitoring of eating, PA, and weight – same as the Premium version. This app version is available for free and is widely accessible by any smartphone user.<sup>27</sup> MT participants will be

asked at baseline to self-monitor their eating, PA, and weight daily. They will be instructed to weigh as often as they can and log the result into the app. They will not receive message prompts

for self-monitoring, no self-monitoring trend reports, and no peer interaction via app customized social group. MT participants will only receive reminders for their assessment visit appointment times.

12  
13

### Technology orientation

Both groups will receive an assigned app username, password, and hands-on orientation to manual food logging and measuring basic step count at baseline. Both groups will receive a paper printed version of an App User Manual designed and adapted for the study.

18  
19

### Focus Groups

Two focus groups will be held 6 months post-baseline with a purposive sample of MT+ completers stratified according to their weight loss experience (successful or unsuccessful in

achieving the 5% baseline body weight loss goal) to solicit their perceptions on the MT+ intervention efficacy, acceptability, and feasibility.<sup>28</sup> Two groups permits cross-case comparative

analysis of the intervention.<sup>29,30</sup> A semi-structured interview guide will facilitate 90-minute discussion led by two co-moderators. Moderator-debriefing and reflexive memos will also be

25

28 summarized after each interview and audio files will be transcribed verbatim. Collectively, these <sup>31</sup> 29  
30 items will create a decision trail which will serve as an audit demonstrating accountability.

30

31 **Outcomes**32 *Primary outcome*

33 Primary outcome is loss of body weight (kg and % body weight) at 3 and 6 months  
34 compared to baseline. The Tanita Scale (TBF-215) will be used to measure height,  
weight, and <sup>35</sup> <sup>32</sup> at the baseline, 3, and 6 month assessment visits. Weekly, the  
graduate assistant (GA) will

36 **BMI**

37 also log into each participant's Lose-It! account and export participant-logged weights.

38

39 *Secondary outcomes*

40 Secondary outcomes include improved diet and increased PA measured at 3 month and 6  
41 months compared to baseline. Fruit and vegetable consumption will be measured using  
the <sup>42</sup>

43 Behavioral Risk Factor Surveillance System (BRFSS) Fruit and Vegetable Dietary Intake Module (6  
44 items).<sup>33</sup> The BRFSS Physical Activity Questionnaire will also be used to measure

44

45 self-reported PA of the participants <sup>33</sup>. To measure the sugar sweetened beverage intake, the  
46 Brief Questionnaire to Assess Beverage Intake (BEVQ-15) will be used to measure sugar <sup>47</sup>  
sweetened beverage intake. Participant's "weekly summaries" will also be exported from the  
app

48 which includes daily food log, PA, weights, and total daily step count.

49

50

51 **Participant timeline** (See Figure 1)

52

53 **Recruitment and consent**

54 Participant recruitment will occur through CAB and student outreach, Facebook blasting,  
55 website, press releases, business postings, community fairs, clinician office outreach, and  
direct <sup>56</sup>

57

58

59

60 Page 8 of 46

1

2

3 referral. Recruitment of minority men will be sought through community health workers who 4

5 already have established local trust.

6 Enrollment screening calls will be conducted by GAs. The PAR-Q 17 health questionnaire  
7 will be used to determine if clinician clearance is required prior to the baseline visit. Thus, 8 informed  
9 consent (see Appendix III) will be obtained prior to its completion during the screening 9 call.

10 Research electronic data capture (REDCap) will permit real-time participant consenting.

11 Study data will be collected and managed using REDCap electronic data capture tools  
12 hosted at

13 UNMC. REDCap (Research Electronic Data Capture) is a secure, web-based application 12  
14 designed to support data capture for research studies. REDCap at UNMC is supported by  
15 Research IT Office funded by Vice Chancellor for Research (VCR). This publication's contents  
16 are the sole responsibility of the authors and do not necessarily represent the official views of the  
17 VCR and NIH. When determined eligible, the participant will be invited to participate in the  
18 process of informed consent via a REDCap weblink to the secure consenting page sent via text 18 message or  
19 email. After verifying their reading of the consent and answering relevant questions, 19  
20 the participant will provide a wet-signature, immediately verifiable online by the GA. The  
21 informed consent document specifies the posting of clinical trial information at  
22 ClinicalTrials.gov. A printed copy of the signed consent will be mailed to each participant  
23 immediately following conclusion of the enrollment interview.  
24

### 25 **Randomization and blinding**

26 Random allocation of group assignment will occur using an allocation schedule created 27  
28 by the project statistician using a random number generator and “turn randomization” to ensure  
29 equal sample sizes. The outcome assessor will receive a REDCap code and designated app  
30 username and password, along with the participant's group assignment so to assist participants  
31 with successful download and orientation to the app version. Receipt of a smart scale and  
32 premium subscription prevents subject blinding. However, many published pRCT's do not blind  
33 treatment groups.<sup>34</sup> Our comparison group uses the basic app, which is routinely available for 34 free in  
35 community care, thus is not a masked placebo. Our study aims seek to evaluate feasibility 35  
36 and preliminary efficacy of the mobile technology intervention, and mobilization of rural 37  
38 community resources within routine care. We considered the decision to unmask to be in the  
39 realm of these two aims reflective of this real-world, rural setting.

### 40 **Measurements, data management, and analysis**

41 Measures

42  
43 Table 1 outlines the primary and secondary outcome measures. Measures at 3 month and 6  
44 months will be compared to baseline. Additionally, health history, demographics, blood pressure, 45  
46 pulse rate, Comfort with Technology, health ITUES, and PROMIS -29 surveys will be collected  
47 for further analysis of participants profile and outcomes.



Table 1

| Measure Description (Data Collection Time Points) |                        |                                  |
|---------------------------------------------------|------------------------|----------------------------------|
| Primary Outcomes: Body Mass Index and Weight      |                        |                                  |
| Body mass index                                   | Tanita Scale (TBF-215) | Baseline, 3 months, and 6 months |

|                                                                      |                                                                                                                                             |                                                      |
|----------------------------------------------------------------------|---------------------------------------------------------------------------------------------------------------------------------------------|------------------------------------------------------|
| Weight                                                               | In-person measurement of weight by the Tanita Scale (TBF-215)                                                                               | Baseline, 3 months, and 6 months                     |
|                                                                      | Withings© Body+ Body Composition Smart Scale (MT+)                                                                                          | Daily measure (Recommended), Weekly average computed |
|                                                                      | Self-reported weight (MT)                                                                                                                   | Daily (Recommended), Weekly average computed         |
| Secondary Outcomes: Diet and Physical Activity                       |                                                                                                                                             |                                                      |
| Fruit and Vegetable Servings                                         | BRFSS-Fruit and Vegetable Dietary Intake module <sup>3</sup>                                                                                | Baseline, 3 months, and 6 months                     |
| Sugar-Sweetened/ Total Beverage Energy Intake                        | Brief Questionnaire to Assess Beverage Intake (BEVQ-15) <sup>35</sup>                                                                       | Baseline, 3 months, and 6 months                     |
| Physical Activity                                                    | BRFSS- Physical activity module <sup>33</sup>                                                                                               | Baseline, 3 months, and 6 months                     |
| Report of daily log of dietary intake, physical activity, and weight | Weekly summary downloaded from app which includes participants self- report of dietary intake, physical activity, weight, and steps per day | Weekly reports exported during study                 |

*Height, weight, and BMI*

The Tanita TBF-215 Body Composition Analyzer will be used to measure the participants height, weight, and BMI following their manual guidelines.<sup>32</sup> The participant will be 33

34 asked to remove shoes, socks, belt, and empty pockets. The participant will be asked to stand up 35  
straight so height can be accurately measured. 36

37 *Food and beverage intake*

38 To establish a baseline of food and beverage intake, the BRFSS Fruit and Dietary Intake

39 Survey and the BEVQ-15 will be administered to participants at timepoints in table 1.<sup>3,35</sup> 40

41 Additional information will be exported from the app logs and analyzed. Each week, the GA

42 will log into the participants web version of the app to retrieve the “weekly summary” of 43

meals/day logged and average calories/day/week and export the data to participants ID

labeled

44 file.

45

46 *Physical activity*

47 The BRFSS physical activity questionnaire will be used to gather participants self-report

48 <sup>33</sup> Additionally, like the food intake, each week the GA will retrieve from the app the

49 of PA.

50 “weekly summary” of PA and total daily step count.

51

52 *Blood pressure and pulse rate*

53 The ADC e-sphyg<sup>TM</sup> 2 9002 Automatic Sphygmomanometer will be used to measure

54 blood pressure of the participants. The participant will be asked to wear loose clothing or a short

55 sleeve short, to avoid caffeine, intensive exercise and smoking for at least 30 minutes before

56

57

58

59

60

1

2

3 measurement. The participant will be instructed to not talk during the rest period or during 4

5 measurement. The man’s arm will be placed on a desk or table so that the middle of the arm is at

6 the level of the heart. The outcome assessor will line up the cuff mark “artery” over the

7 individual’s brachial artery. For 5 minutes, the participant will quietly sit in a chair (feet on floor,

8 back supported) and rest without talking. After obtaining a blood pressure, the participant will be

9 asked to raise his arm for 10 seconds and wait another 30 seconds. Then the blood pressure

10 procedure will be repeated with measurements spaced about one minute apart. The procedure 11 will be

repeated until two readings are within 5mmHg and average the two values together. Two 12

13 resting pulse rates will also be obtained using the blood pressure cuff and these values will be 14

averaged together and recorded.<sup>36</sup>

15

*Health history and demographics*

A brief health history survey will be administered at baseline. The PROMIS-29 will be administered at baseline, 3 month, and 6 months to measure general health and asked questions

37

related to physical function, anxiety, sleep, fatigue, and pain.

*Technology experience*

Comfort with Technology Survey<sup>38</sup> (baseline), and the Technology Feasibility and Acceptability survey which was adapted from the health-ITUES<sup>39</sup>(3 and 6 months) to examine technology experience. The comfort with technology survey asks questions related to comfort, frequency, and purpose of technology use.<sup>38</sup> The modified health-ITUES evaluates technology

39

usefulness.

**Data Management**

The outcome assessor will receive a participant specific REDCap code to enter assessment information. To encourage participant retention, the GA will contact MT+ group participants if they fail to log their eating, activity, or weight in the Lose-it app for greater than five days. If the participant states he cannot log daily the GA will document reasons and encourage participant to post as often as he can.

*Analysis**Aim 1- MT+ intervention feasibility and acceptability*

Aim 1 will be evaluated through: 1) participation rates including number of men recruited and randomized over a 6-month period; 2) participant retention rates; 3) feasibility, usability, satisfaction ratings; 4) app logs of MT+; and 5) evaluative focus group feedback. Descriptive

statistics will be calculated on all variables, including frequencies and percentages for recruitment/retention, demographic, and categorical variables. Means and standard deviations

will be calculated for all continuous variables and measures at each time point. Feasibility and acceptability analyses for aim 1 are largely descriptive, as we will be assessing participation rates

and percentages of eligible men and which recruitment methods were the most effective. Qualitative content analysis<sup>31</sup> will guide interpretation of the focus group findings. The

interview transcript and reflective memos taken during each focus group will comprise one unit

of analysis for within/across case comparison. The topics outlined by the interview guide will be

extracted and organized and transcripts read for substantive coding. Data “facts” will be

organized under a-priori coding categories. The categories are named a-priori because they are built into the interview guide questions. A data “fact” will be defined as those data elements that

58  
59  
60 Page 11 of 46

1  
2

3       recurred in the interview without lack of consensus or were least participant to errors in 4<sup>40</sup> All data  
provided in a response to each question will be coded together. Incomplete,

5       inference.

6       competing, or alternative topics that present in the discussion but were not identified a priori will  
7       be aggregated and examined to determine their fit with the purpose.<sup>41</sup> A data matrix will be used  
8       to display the coded data to search for patterns across coding categories. The PI and GA will  
9       return to the data to explore patterns further, supporting iterative analysis. Data categories will  
be

10       re-contextualized into an account that makes sense for the entire study's data set. Meaning, the  
11       findings are integrated to provide new understanding or explanation to the interpretation of the

12       <sup>41</sup> Peer-debriefing and audit checking will occur weekly across the 13       intervention  
outcome data.

14       analysis by the PI and GA to assure accuracy of the findings.

15

16       *Aim 2- Preliminary efficacy of MT+ to MT in achieving weight loss*

17       The efficacy analyses will be tested via RM-ANOVA models, as they provide a direct  
18       measure of differences between the intervention and comparison groups in weight loss  
and 19

20       dietary and PA behaviors across the study, as well as effect size estimates. Huynh-Feldt  
21       corrected F-tests will be used in order to account for any possible violation of sphericity. If there  
22       is a higher than expected attrition rate, a maximum likelihood estimation method (i.e. mixed  
23       models) will be used instead of RM-ANOVA in order to utilize all available data and not delete  
24       cases in a listwise manner. Overall weight lost at follow-up will be assessed via an independent  
25       groups t-test. Outcome variables that are not normally distributed will either be transformed or  
26       assessed with non-parametric methods.

27

28

29       *Aim #3- Indicators of community capacity*

30       Multiple indicators of community capacity will be used to evaluate support for the  
31       weight loss intervention applying best practice recommendations: 1) CAB- assessed  
community

32       capacity change via survey report, participation level of CAB members (i.e. number of  
attended

33       meetings, activities, resources allocated, partnership linkages), member attrition with  
reasons,

perceived benefits/skills gained, barriers and facilitators of retention, proposed strategies to

increase retention, 2) student support in the outreach and recruitment will be tracked via number of hours of participation and partnership linkages.

Data Monitoring, Auditing, and Harm

Each participant will be given a unique study identifier, all protected health information will be masked, and REDCap data exports will be limited to the PI and the project statistician for generating reports and the conduct of statistical data analysis. Safety monitoring will be conducted monthly by the PI, study statistician, and independent data safety monitor. Per university policy, all serious adverse events (AE) and unintended effects of the intervention will be reported to the UNMC IRB and the independent data safety monitor (IDSM) within two days after the PI is notified of the AE. The technology safety report will include troubleshooting requests from participants, re-engagement attempts for participants who were not logging, and any technology related protocol violations. The enrollment safety report includes new enrollment counts, subject withdrawals, protocol violations, AE, and preliminary outcomes.

### **ETHICS AND DISSEMINATION**

This protocol, including consent forms, has been approved by the University of Nebraska Medical Center Institutional Review Board (UNMC IRB# 594-17-EP). All protocol amendments

will be communicated immediately to the IRB, DSMP, ClinicalTrials.gov, CAB, participants, and funder. All participants will be informed of their right to confidentiality right to leave the trial at any point without loss of those benefits to which they were entitled. All data will be retained in HIPPA compliant REDCap database.

### **Access to data**

The PI, study statistician, and the designated IDSM will have access to the final trial dataset. All proposed study specific case report forms for data collection will be coded by the participants unique study ID and maintained in REDCap. All data and other personal health information (PHI) will be removed from the study database upon completion of the study.

### **Ancillary and post-trial care**

Post-trial care is not anticipated as this trial is classified as a low-risk intervention. Participants who express need for assistance will be informed of the UNMC support services and assisted in contacting them.

**Dissemination policy**

Trial is registered at ClinicalTrials.gov., Identifier: NCT03329079. Deidentified summary results will be posted to ClinicalTrials.gov for public access and disseminated in scientific forums and to the local rural communities. 24

**AUTHORS' CONTRIBUTIONS**

CE is PI directing all study components. KK is the statistician who co-leads data management.

FS, AY, and KS develop and manage the mobile technologies. PH provides protocol oversight, assessment fidelity planning and training, JM conducts enrollment screening, recruitment, CAB and focus group moderation. CP advises ethics board and protocol adherence. Manuscript drafted 31 by CE, KS and all authors revised-approved the final version. All authors contributed substantially to study design and protocol conduct.

**FUNDING STATEMENT:** Study supported by the National Institute of Nursing Research of 35 the National Institute of Health under award number R15NR017522.

**COMPETING INTERESTS:** None declared.

**REFERENCES**

- 5 1. Statistics NCfH. National Health and Nutrition Examination Survey 2017 [Available from: 6  
<https://www.cdc.gov/nchs>. accessed 1 Aug 2019.
- 7 2. Foundation RWJ. The State of Obesity 2016 [Available from:  
<https://www.stateofobesity.org/>.
- 8 3. Centers for Disease Control and P. Surveillance of Fruit and Vegetable Intake Using  
the 9 Behavioral Risk Factor Surveillance System 2011 [Available from: 10  
[https://www.cdc.gov/brfss/pdf/fruits\\_vegetables.pdf](https://www.cdc.gov/brfss/pdf/fruits_vegetables.pdf) accessed 8/1 2017.
- 11
- 12 4. Meit M, Knudson A, Gilbert T, et al. The 2014 update of the rural-urban chartbook. In: Center 13  
RHRaP, ed. Bethesda, MD: Rural Health Reform Policy Research Center, 2014.
- 14 5. Shelton JB, Rajfer J. Androgen deficiency in aging and metabolically challenged men.  
*The*  
15 *Urologic clinics of North America* 2012;39(1):63-75. doi: 10.1016/j.ucl.2011.09.007  
16 [published Online First: 13 Oct 2011]
- 17 6. Eisenhauer CM, Hageman PA, Rowland S, et al. Acceptability of mHealth Technology  
for  
18 Self-Monitoring Eating and Activity among Rural Men. *Public Health Nursing* 19  
20 2017;34(2):138-46. doi: <https://doi.org/10.1111/phn.12297> [published Online First:  
21 October 18, 2016]
- 22 7. Han M, Lee E. Effectiveness of Mobile Health Application Use to Improve Health  
Behavior  
23 Changes: A Systematic Review of Randomized Controlled Trials. *Healthcare*  
*Informatics*  
24 *Research* 2018;24:207. doi: 10.4258/hir.2018.24.3.207
- 25 8. Beileigoli A, Andrade A, Cançado A, et al. The impact of web-based digital health 26  
27 interventions on weight loss and lifestyle habits changes in overweight and obese adults:  
28 a systematic review and meta-analysis (Preprint). *Journal of Medical Internet Research*  
29 2017;21 doi: 10.2196/jmir.9609
- 30 9. Fortuin J, Salie F, Abdullahi LH, et al. The impact of mHealth interventions on health  
31 systems: a systematic review protocol. *Systematic Reviews* 2016;5(1):200. doi:  
32 10.1186/s13643-016-0387-1
- 33 10. Anderson-Lewis C, Darville G, Mercado R, et al. mHealth Technology Use and  
Implications 34  
35 in Historically Underserved and Minority Populations in the United States: Systematic  
36 Literature Review. *JMIR mHealth and uHealth* 2018;6 doi: 10.2196/mhealth.8383 37
11. Neumark-Sztainer D, Shenvood NE, French SA, et al. Weight control behaviors  
among adult 38 men and women: cause for concern? *Obesity research* 1999;7(2):179-88.
- 39 12. Lemon SC, Rosal MC, Zapka J, et al. Contributions of weight perceptions to weight loss 40  
attempts: differences by body mass index and gender. *Body image* 2009;6(2):90-96. doi:  
41 10.1016/j.bodyim.2008.11.004  
42

- 43 13. French SA, Jeffery RW, Wing RR. Sex differences among participants in a weight-control 44  
program. *Addictive Behaviors* 1994;19(2):147-58. doi: 10.1016/0306-4603(94)90039-6 45 14. Lovejoy  
46 14. Lovejoy JC, Sainsbury A, Stock Conference Working G. Sex differences in obesity and the 46 regulation of energy  
homeostasis. *Obesity Reviews* 2009;10(2):154-67. doi:  
47 10.1111/j.1467-789X.2008.00529.x [published Online First: 28 Oct 2008]  
48 15. Klitzman P, Armstrong B, Janicke DM. Distance as a Predictor of Treatment  
Attendance in a 49  
50 Family Based Pediatric Weight Management Program in Rural Areas. *The Journal of*  
51 *Rural Health* 2015;31(1):19-26. doi: 10.1111/jrh.12078 [published Online First: 15 Jun  
52 2014]  
53 16. Hiebert B, Leipert B, Regan S, et al. Rural men's health, health information seeking,  
and 54 gender identities: A conceptual theoretical review of the literature. *American*  
*Journal of*  
55  
56  
57  
58  
59  
60 Page 14 of 46
- 1  
2  
3 *Men's Health* 2018;12(4) doi: 10.1177/1557988316649177 [published Online First: 11 4  
5 May 2016]  
6 17. Graham LJ, Connelly DM. "Any movement at all is exercise": A focused  
ethnography of 7 rural community-dwelling older adults' perceptions and  
experiences of exercise as self8 care. *Physiotherapy Canada* 2013;65(4):333-41. doi:  
10.3138/ptc.2012-31.  
9 18. Hertzog MA. Considerations in determining sample size for pilot studies. *Research in*  
10 *nursing & health* 2008;31(2):180-91. doi: 10.1002/nur.20247  
11 19. Christian JB, Brouwer ES, Girman CJ, et al. Masking in Pragmatic Trials: Who, What, and 12  
13 When to Blind. *Therapeutic Innovation & Regulatory Science* 2019;2168479019843129.  
14 doi: 10.1177/2168479019843129  
15 20. Shapiro JR, Koro T, Doran N, et al. Text4Diet: a randomized controlled study using text 16  
messaging for weight loss behaviors. *Preventive medicine* 2012;55(5):412-17. doi:  
17 10.1016/j.ypmed.2012.08.011 [published Online First: 27 Aug 2012]  
18 21. Shaw RJ, Bosworth HB, Hess JC, et al. Development of a theoretically driven  
mHealth text 19  
20 messaging application for sustaining recent weight loss. *JMIR mHealth and uHealth*  
21 2013;1(1):e5. doi: 10.2196/mhealth.2343  
22 22. Patrick K, Raab F, Adams M, et al. A text message-based intervention for weight loss:



randomized controlled trial. *Journal of medical Internet research* 2009;11(1):e1. doi: 24  
10.2196/jmir.1100 [published Online First: 13 Jan 2009]

23. Gerber BS, Stolley MR, Thompson AL, et al. Mobile phone text messaging to promote 26  
healthy behaviors and weight loss maintenance: a feasibility study. *Health informatics 27*  
*journal* 2009;15(1):17-25. doi: 10.1177/1460458208099865

24. Joo N-S, Kim B-T. Mobile phone short message service messaging for behaviour  
modification in a community-based weight control programme in Korea. *Journal of 31*  
*telemedicine and telecare* 2007;13(8):416-20. doi: 10.1258/135763307783064331

25. Lee D, Moon J, Kim YJ, et al. Antecedents and consequences of mobile phone usability:  
Linking simplicity and interactivity to satisfaction, trust, and brand loyalty. *Information  
& Management* 2015;52(3):295-304. doi: <https://doi.org/10.1016/j.im.2014.12.001> 35

26. United States Department of A. Dietary Guidelines for Americans, 2018.

27. Zuidgeest MGP, Goetz I, Groenwold RHH, et al. Series: Pragmatic trials and real world 38  
evidence: Paper 1. Introduction. *Journal of Clinical Epidemiology* 2017;88:7-13. doi: 39  
<https://doi.org/10.1016/j.jclinepi.2016.12.023> [published Online First: 14 May 2017] 40 28.

Hydén L-C, Bülow PH. Who's talking: drawing conclusions from focus groups—some 41  
methodological considerations. *IntJ Social Research Methodology* 2003;6(4):305-21. doi:

<https://doi.org/10.1080/13645570210124865> [published Online First: 03 Jun 2010]

29. Rodgers BL, Cowles KV. The qualitative research audit trail: A complex  
collection of 45 documentation. *Research in nursing & health* 1993;16(3):219-26.

30. DL M. Reconsidering the role of interaction in analyzing and reporting focus groups.  
*Qualitative Health Research* 2010 20(5):718-22.

31. Hsieh H-F, Shannon SE. Three approaches to qualitative content analysis. *Qualitative health  
research* 2005;15(9):1277-88. doi: 10.1177/1049732305276687

32. Tsui EYL, Gao, X.J., & Zinman, B. Bioelectrical Impedance Analysis (BIA) using bipolar  
foot electrodes in the assessment of body composition in Type 2 Diabetes Mellitus.

*Diabetic Medicine* 1998(15):125-28. .

- 5 factor surveillance system. *Medicine and science in sports and exercise*  
6 2000;32(11):1913-18. doi: 10.1097/00005768-200011000-00015
- 7 34. Christian JB, Brouwer ES, Girman CJ, et al. Masking in Pragmatic Trials: Who, What, and 8  
9 When to Blind. *Therapeutic Innovation & Regulatory Science*. May, 2, 2019 ed: SAGE  
10 Publications Inc, 2019.
- 11 35. Hedrick VE, Savla J, Comber DL, et al. Development of a brief questionnaire to  
12 assess 11 habitual beverage intake (BEVQ-15): sugar-sweetened beverages and total  
13 energy intake. *Journal of the Academy of Nutrition and Dietetics* 2012;112(6):840-49.  
14 doi: 10.1016/j.jand.2012.01.023
- 15 36. Perloff D, Grim C, Flack J, et al. Human blood pressure determination by  
16 sphygmomanometry. *Circulation* 1993;88(5 Pt 1):2460-70. doi: 10.1161/01.cir.88.5.2460
- 17 37. Craig BM, Reeve BB, Brown PM, et al. US valuation of health outcomes measured using the  
18 PROMIS-29. *Value in Health* 2014;17(8):846-53. doi: 10.1016/j.jval.2014.09.005 19
- 20 38. Eisenhauer CM, Pullen EdD CH, Nelson T, et al. Partnering with Rural Farm Women for  
21 Participatory Action and Ethnography. *Online Journal of Rural Nursing and Health Care*  
22 2016;16(1):195-216. doi: <https://doi.org/10.14574/ojrnhc.v16i1.397> [published Online  
23 First: March 24, 2016]
- 24 39. Yen P-Y, Wantland D, Bakken S. Development of a Customizable Health IT Usability  
25 Evaluation Scale. *AMIA Annual Symposium proceedings AMIA Symposium*  
26 2010;2010:917-21.
- 27
- 28 40. Saldaña J. *The coding manual for qualitative researchers*. 3 ed. Thousand Oaks, CA: Sage  
29 2015.
- 30 41. Liberato SC, Brimblecombe J, Ritchie J, et al. Measuring capacity building in communities:  
31 a review of the literature. *BMC public health* 2011;11(1):850.
- 32  
33  
34  
35  
36  
37  
38  
39  
40  
41  
42  
43  
44  
45  
46  
47  
48

49  
50  
51  
52  
53  
54  
55  
56  
57  
58  
59  
60

1

**2 Appendices Appendix I: Private Group Discussion Board- Moderator Weekly Posts****Week 1: Water**

Thousands have lived without love, not one without water (Auden). A recent study found that drinking 16 oz of water before meals increases fat loss in overweight individuals on a diet. Drink one gallon of water per day. This can come from food or beverage. Fruits and vegetables contain more water than other foods. Carrying a refillable water bottle with you during the day can help you increase your water consumption.

For more information: <https://www.mensjournal.com/food-drink/5-reasons-never-neglectwater/>  
Challenge: Increase your daily water consumption to 1 gallon per day.

**Week 2: Increasing Physical Activity**

Physical activity reduces the risks of heart disease and diabetes better than weight loss alone. The American Heart Association recommends 30 minutes of moderate activity 5 days per

Moderate activity includes walking, hiking, gardening, or golfing. Moderate activity makes you sweat but will not take your breath away.

A great way to start is by walking. Start by walking 10-15 minutes at a time to total 30 minutes

For more information: <https://healthyforgood.heart.org/move-more/articles/hate-exercise-5->

Challenge: exercise for an additional 30 minutes per week beyond what you are already doing.

week.

a day.

[steps-to-loving-exercise](#)

**Week 5: Avoiding Empty Calories**

Empty calories are calories that provide your body with no nutrition. They are found in packaged foods like cakes, cookies, candy, soda, alcohol, fast food etc.

They are high calorie, low nutrition, and contain high amounts of sugar and solid fat.

As a general rule, if it comes in a package it probably contains empty calories.

Try eating more whole food calories in fresh fruits and vegetables, eggs, poultry, nuts, whole wheat bread, protein bars, or low-fat milk

For more information: <http://www.menshealth.co.uk/healthy/11-ways-to-cut-hundreds-ofempty-calories-a-day>

Challenge: Limit your empty calorie intake to 200 calories per day.

**Week 4: Family/Friends Challenge**

Having family and friends involved in your diet and exercise program can contribute to your success. Let others know about your eating goals so healthy options can be available. Instead of watching TV with others, try going on an evening walk together. Encouraging others to get involved with you will not only be beneficial for you, but them as well!

For more information: <https://www.parents.com/fun/sports/exercise/10-ways-to-exercise-as-a-family/>

Weekly challenge: Include your family in exercise 2 days this week.

**Week 5: Portion Sizes**

1  
2

Serving size and portion size are not always the same. Serving size is the manufacturer's recommendation of the serving, portion size is how much is actually consumed. Your portion size should match the serving size.

Veggies: 1 cup of raw veggies or 2 cups of leafy greens. 1 cup is roughly size of a fist

Fruit: one medium apple or orange, ½ cup of sliced fruit. ½ cup is one cupped hand

Grains: 1 slice of bread. ½ cup of dry pasta or bread. ½ medium potato.

Protein: 3 oz of meat is the size of a deck of cards.

Fats: 1 oz of cheese is size of two dice. 1 tsp of butter is the size of one die.

It's important to accurately count your portion sizes to accurately log food for weight loss. If you are under counting your portion size, you will not account for calories you are consuming.

For more information: <https://healthyforgood.heart.org/eat-smart/articles/portion-size-versusserving-size>

Challenge: Examine your portion sizes during at least one meal each day this week and try to improve your portion sizes. Use the information above as a guideline.

Sodium contributes to the development of high blood pressure, which is the one of the major

The American Heart Association recommends a sodium intake of 2300mg a day with an ideal

2300mg of sodium is equivalent to one teaspoon of salt.

Most sodium consumed by Americans does not come from table salt but is in processed foods.

The easiest way to avoid sodium is to avoid processed foods.

In the Lose-it! App, you can create a goal to limit your sodium intake to 2300mg daily. The app will automatically track sodium as you log food, so you can view your sodium

For more information: <https://www.menshealth.com/health/a19548436/blood-pressure-guide/>

Weekly challenge: Limit sodium intake to 2300mg daily.

## Week 6: Avoiding Salt/Sodium

3 risk factors for heart disease.  
4 limit of 1500mg a day.  
5 consumption each day.  
6  
7  
8  
9  
10  
11  
12  
13  
14  
15

### 16 **Week 7: Moving Every Hour**

17 A study was conducted in 2017 which found that patterns of sitting are associated with higher  
18 illness.

19 Not only is exercise important, but so is moving every hour! It's easy to forget to move every  
20 hour, so try setting a timer on your phone or watch to get up and walk around.

21 For more information:

22 [https://www.mensjournal.com/health-fitness/a-five-minute-walk-could-undo-an-hour-  
23 of-sitting-20141009/](https://www.mensjournal.com/health-fitness/a-five-minute-walk-could-undo-an-hour-of-sitting-20141009/)

24 Challenge: Move every hour from 9-5. The goal is to have 9/9 hours active!

### 25 **Week 8: Improve Sleep Quality**

26 A good night's sleep is an important component to weight loss programs.

27 The recommendation for sleep for adults is 7 hours per night.

28 Insufficient sleep is linked to the development of chronic disease like obesity, diabetes,  
29 depression, and cardiovascular disease.

30 Here are some tips for better sleep:

31 1. Make your bedroom a quiet and relaxing environment.  
32  
33  
34  
35  
36  
37  
38  
39  
40  
41  
42  
43  
44  
45  
46  
47  
48  
49  
50  
51  
52

2. Turn off screens 30 minutes before bed
  3. Be consistent. Get your body on a “sleep schedule” so you go to bed and wake up at the same time.
  4. Avoid large meals before bed.
  5. Exercise! Exercise is proven to improve sleep quality.
- For more information: <https://www.mensjournal.com/style/sleep-better-live-better/>  
Challenge: Try to get 7 hours of sleep each night this week.

#### **Week 9: Fit After 40**

As we get older our bodies change and our metabolism slows.  
Staying fit after 40 is a little different than it was when you were in your 20s!  
Lean tissue mass will start to decline and fat mass will increase.  
Diet and exercise can help prevent this process.  
Here are some tips for weight loss after 40:

1. Start with moderate activity like walking. If you are already walking several times a week, try incorporating strength training into your routine.
2. Cut back on red meat. Increase intake of lean protein and veggies.
3. Avoid alcohol. Alcohol contains empty calories and provides no nutritional value.
4. Reduce stress. Stress causes increase in cortisol levels which is associated with increased body fat.

Here is an article with additional tips for weight loss:

<https://www.mensjournal.com/healthfitness/7-weight-diet-loss-tips-men-over-40/>

Challenge: Try at least one of the four tips listed above this week.



### Week 10: Strength Training

Strength training is an important piece to exercise.

The American Heart Association recommends strength training two days a week.

With a larger muscle mass, your metabolism increases and your body burns calories more

Strength not only increases muscle mass but increases bone mass as well.

For more information: <https://www.mensjournal.com/health-fitness/beginners-guide-weight-training/>

Challenge: Incorporate strength training into your exercise program two days this week

efficiently.

[weight-training/](https://www.mensjournal.com/health-fitness/beginners-guide-weight-training/)

### Week 11: Reducing Stress

According to the American Heart Association, chronic stress can cause high blood pressure, is linked to heart disease, and can weaken your immune system.

During stressful times, it's important to continue to practice healthy lifestyle behaviors.

Some helpful tips to managing stress include:

1. Exercise
2. Get adequate sleep
3. Maintain a healthy diet
4. Spend time with family or friends.

For more information: <https://www.mensjournal.com/health-fitness/20-science-backed-ways-reduce-stress/>

Challenge: Try at least one of the four tips listed above this week.

### Week 12: Making a Diet Your Lifestyle

You made it!

Congrats, this is the final week of the study.

53  
54  
55  
56  
57  
58  
59  
60

One thing you can do to stay on track is continue healthy eating and physical activity.  
Continue to log your food to track your caloric intake.  
Increase your physical activity to moderate or vigorous if tolerated.  
There are various apps available to track food and activity which you can use after this study.  
For more information: <https://www.mensjournal.com/health-fitness/how-to-add-18-years-toyour-life-w436796/>

For peer review only

Challenge: Make a plan and stick to it!

**Appendix II: List of Text Messages**

| <b>G=Goal Oriented/Self-Monitoring</b>                                                                                                                         |
|----------------------------------------------------------------------------------------------------------------------------------------------------------------|
| 1. Healthy isn't a goal. It's a way of living.                                                                                                                 |
| 2. Work hard enough to raise your heart rate and break a sweat.                                                                                                |
| 3. Today your goal is to exercise for 10 minutes, 3 times today.                                                                                               |
| 4. Eat plenty of fruits of all colors today.                                                                                                                   |
| 5. Did you eat the recommended amount of protein today? No beer is not protein.                                                                                |
| 6. Avoiding processed meats is best, try choosing fish or lean meat today.                                                                                     |
| 7. Don't overeat. Your goal today is to control your portion sizes at meals.                                                                                   |
| 8. How many servings of fruits or vegetables did you eat yesterday?                                                                                            |
| 9. How many glasses of water did you drink yesterday?                                                                                                          |
| 10. Make sure half of the grains you eat are whole grains. Whole grains can help give you a feeling of fullness. Choose whole-wheat breads, pasta and oatmeal. |
| 11. Take your time eating. Savor your food. Eat slowly. Enjoy the taste and textures of your food.                                                             |
| 12. Make half your grains whole grains.                                                                                                                        |
| 13. Try eating on a normal sized plate that is 8 inches round. It might look like the saucer to your coffee cup at first.                                      |
| 14. Short bouts of 10 minutes of moderate or vigorous activity count!                                                                                          |
| 15. Avoid heavy gravies or sauces as they add fat and calories to otherwise healthy choices. (And they stain your shirt).                                      |

**M = Motivational**

For peer review only

- |                                                                                                                         |
|-------------------------------------------------------------------------------------------------------------------------|
| 16. No matter how slow you go, you're lapping everybody on the couch.                                                   |
| 17. Good things come to those who sweat. Especially if you are moving when sweating.                                    |
| 18. 10,000 steps is roughly walking 5 miles. Then you can tell stories that you walked 5 miles for (fill in the blank). |
| 19. Make it a lifestyle, not a duty.                                                                                    |
| 20. Don't use the weekend as an excuse to give up on your goals.                                                        |
| 21. Sweat is fat crying.                                                                                                |
| 22. It's not easy, but it is worth it. Now repeat that every day.                                                       |
| 23. Be stronger than your excuses.                                                                                      |
| 24. Some activity is better than none.                                                                                  |
| 25. You don't have to eat less you just have to eat right.                                                              |
| 26. A one-hour workout is 4% of your day.                                                                               |
| 27. When you feel like quitting, ask yourself why you started.                                                          |
| 28. Thank you for reading this text. You can lose ½ a pound by pushing the off button 20,000 times.                     |
| 29. When tempted by junk food, turn your head to the left and then to the right. Repeat as necessary.                   |
| 30. Attitude is everything! New day! New Strength! New Thoughts!                                                        |
| 31. No matter how slow you go, you are still lapping everybody on the couch!                                            |

|                                                       |
|-------------------------------------------------------|
| 32. Will it be easy? NOPE! But it will be WORTH IT!!! |
|-------------------------------------------------------|

|                                                               |
|---------------------------------------------------------------|
| 33. Nothing is impossible, the word itself says I'm Possible. |
|---------------------------------------------------------------|

1  
2

|                                                                                                                                                                                                                                                                                                                                                                                                                               |
|-------------------------------------------------------------------------------------------------------------------------------------------------------------------------------------------------------------------------------------------------------------------------------------------------------------------------------------------------------------------------------------------------------------------------------|
| 34. Strive for progress not perfection!                                                                                                                                                                                                                                                                                                                                                                                       |
| 35. Being healthy is not a race, it's a journey!                                                                                                                                                                                                                                                                                                                                                                              |
| 36. You've Got This!!                                                                                                                                                                                                                                                                                                                                                                                                         |
| 37. You are stronger than you think!!                                                                                                                                                                                                                                                                                                                                                                                         |
| 38. BLT's- Bites, licks, tastes count too.                                                                                                                                                                                                                                                                                                                                                                                    |
| 39. You'll never change your life until you change something you do daily. The secret to success is found in your daily routine. This year—set a goal to change ONE thing about your day to be healthier. Keep the goal specific and measurable. Instead of saying you are going to exercise this year, tell yourself you are going to exercise for 30 min, 5 days this week. Repeat this each week until it becomes a habit. |
| 40. Are you frustrated? Are you ready to quit? DON'T!! Remember why you started this in the first place!!                                                                                                                                                                                                                                                                                                                     |
| 41. Every step you take toward your goal is a step closer to more time with your family!                                                                                                                                                                                                                                                                                                                                      |
| 42. Even if you lose ½ a pound a week you will still lose 26 pounds by this time next year. Keep going!                                                                                                                                                                                                                                                                                                                       |
| 43. It takes 4 weeks for you to see your body changing, it takes 8 weeks for your friends and family, and it takes 12 weeks for the rest of the world to see the changes, but your heart sees it immediately.                                                                                                                                                                                                                 |
| 44. Be stubborn about your goals and flexible about your methods.                                                                                                                                                                                                                                                                                                                                                             |
| 45. Exercise in the morning, before your brain figures out what you're doing.                                                                                                                                                                                                                                                                                                                                                 |
| 46. You don't have to be extreme, just be consistent.                                                                                                                                                                                                                                                                                                                                                                         |

3  
4  
5  
6  
7  
8  
9  
10  
11  
12  
13  
14  
15 47. It's a slow process but quitting won't get you there.  
16  
17  
18  
19  
20  
21  
22  
23  
24  
25  
26  
27  
28

For peer review only

29  
30 **R = Reminder (for tracking, healthy eating, etc.)**  
31

32 48. Tracking your food intake is a key to success - remember to track today.

33 49. They key to healthy eating? Avoid any food that has a TV commercial.

34 50. Your safety is priority! It may be tempting to compete with others and set an  
35 unrealistic and unhealthy goal for increasing your steps.

36 51. Drink more water today"

37 52. What is moderate activity: I can talk while I do them, but I can't sing.

38 53. Remember to eat a variety of whole grains.

39 54. Make half your plate fruits and vegetables.

40 55. Remember to eat Breakfast.

41 56. Take a walk after lunch.

42 57. Make sure to get your steps in today.

43 58. 5 fruits and veggies a day!

44 59. Did you know....1 pound of fat is approximately the size of a large grapefruit?

45 60. Did you know 1 pound of fat is worth 3500 calories!!

46 61. Have you logged today?

47 62. Guzzle Guzzle the water – 64 oz!!

48 63. Don't forget to log those workouts!

49 64. Daily health checklist: Drink water, eat a fruit or veggie every meal, workout, stretch,  
50 LAUGH and SMILE, try to sleep 8 hours.  
51  
52



|                                                                                                                   |
|-------------------------------------------------------------------------------------------------------------------|
| 65. Did you know weight loss is 30% workout and 70% diet??                                                        |
| 66. Indulge by the rule of 1 – 1 scoop of ice cream, 1 small piece of pie, 1 piece of chocolate.                  |
| 67. Exercise during commercials – get 10 lunges, 10 sit ups or 10 squats!                                         |
| 68. Park farther from the door and walk to get the mail, go to the store, or going to work.                       |
| 69. Take stairs when you can.                                                                                     |
| 70. Eat for energy, not for comfort!                                                                              |
| 71. Did you meet your fitness goals?                                                                              |
| 72. Have you logged your meals today?                                                                             |
| 73. Try redirecting your attention when those cravings hit, give it 15minutes before giving in! Drink some water! |
| 74. It's Friday! Don't lose track this weekend- stay focused!                                                     |
| 75. You don't have to eat less you just have to eat right.                                                        |
| 76. Weekends count! Don't dip out on your diet.                                                                   |
| 77. Try to get 250 steps every hour. Get up and take a walk.                                                      |
| 78. Ask for dressings, butter, and sour cream on the side.                                                        |
| 79. Buffet time? Hit up the salad bar.                                                                            |
| 80. At the buffet? Make one trip. You don't have to eat it all.                                                   |
| 81. A gas station hot dog has 400 calories. Pack a lunch today!                                                   |
| 82. Remember to walk instead of drive when you can!                                                               |
| 83. Switch your soda for water today. 1 can of soda has about 150 calories. 3 cans of soda is 450 calories!       |

84. Remember portion control— check the back of the bag for serving size!

For peer review only

85. Eat slowly and take small bites. It takes 20 minutes for your brain to register fullness.

86. Motivation is what gets you started habit is what keeps you going

87. Consistency is key!

88. At the gas station? Grab a protein bar instead! Protein keeps you full for longer.

89. Too cold to exercise? Try jumping jacks in your living room.

90. Buzz the Buffet. Take a walk around the buffet first before filling your plate. Choose your favorite foods and skip over your least favorite.

91. Don't skip meals! Skipping meals will make you hungrier and cause you to overeat at your next meal

92. Don't forget breakfast! Get your metabolism started today.

93. Food is fuel, not comfort.

94. Going cold turkey doesn't work. One healthy habit in, one bad habit out!

95. The best snacks are 200cal or less, filling yet satisfying. Snacking keeps up your metabolism throughout the day helping you burn calories and keep your energy levels up.

96. Remember, one serving of meat is the size of a deck of cards

97. Drink your first glass of water right when you wake up! Rehydrate and stimulate your digestive system.

98. Eating healthy is not a diet, it's a lifestyle.

99. Create healthy habits not restrictions.

100. Exercise gives you more energy and helps you stay focused.

53  
54  
55  
56  
57  
58  
59  
60

Page 23 of 46

1  
2

|                                                                                                                                  |
|----------------------------------------------------------------------------------------------------------------------------------|
| 101. Even if you lose ½ pound a week. You will still lose 26 pounds by this time next year. Just keep going.                     |
| 102. Tip: put fruits and vegetables at eye level in the fridge so they are the first thing you see.                              |
| 103. Tip: have fresh fruit like bananas or apples on the table so they are easy to grab on the go.                               |
| <b>E = Educational (Tips, Physical Activity, Nutrition/Healthy Eating)</b>                                                       |
| 104. Regular physical activity helps build and maintain healthy bones and muscles, so you can beat your friend at arm-wrestling. |
| 105. Regular physical activity helps reduce the risk of developing colon cancer.                                                 |
| 106. Exercise controls weight.                                                                                                   |
| 107. Exercise improves mood.                                                                                                     |
| 108. Exercise boosts energy.                                                                                                     |
| 109. Exercise promotes better sleep.                                                                                             |
| 110. You may want to work with your doctor to set up an activity program.                                                        |
| 111. Estimating Portion Sizes: 1 egg is 2 ounces or 1/4 cup.                                                                     |
| 112. Adults should do strengthening activities at least 2 days a week.                                                           |
| 113. If you haven't been active in a while, start slowly and buildup.                                                            |
| 114. Estimating Portion Sizes: A golf ball is equal to 2 tablespoons or 1 ounce.                                                 |
| 115. Estimating Portion Sizes: a deck of cards is 3 ounces.                                                                      |

116. Being active has benefits. It helps you feel better about yourself. It helps you sleep better. It helps you move around more easily.

Forpeerreviewonly

117. Adults need about 150 minutes of moderate activity a week.

118. Vigorous-intensity aerobic activity means you're breathing hard and fast, and your heart rate has gone up quite a bit. If you're working at this level, you won't be able to say more than a few words without pausing for a breath.

119. Doing 1 minute of vigorous-intensity exercise is equal to about 2 minutes of moderate activity.

120. Satisfy your "sweet tooth". Eat a natural dessert such as fruit.

121. Sodas or other beverages can add about 400 calories a day to men's diet, water is a better choice.

122. Estimating Portion Sizes: Baseball is equal to 1 cup.

123. Medical authorities agree that 10,000 steps is a healthy number to strive for a day.

124. Calories are tiny creatures that make your clothes tight at night – did you know Coors Light has 102 calories, a Bud Light has 110 calories and a Michelob Ultra has 95 calories per bottle.

125. A six pack of Bud Light has 660 calories. You would have to walk 4.5 miles to burn off the calories.

126. Just 100 extra calories a day means 10 extra pounds a year.

127. If you don't recognize the ingredient, your body won't either.

128. Don't be fooled by "low fat" or "sugar free." This is code for "processed." Stick to whole foods!

129. Avoid eating foods with ingredients you can't pronounce.

130. Sugar craving? Swap the sweets for fresh or frozen fruit instead.

131. Craving fatty foods? Try a glass of milk, 1/2c of yogurt, or 1oz of cheese.

### Holiday Messages

132. Turkey or ham? Turkey has 200 calories for a 4oz serving. Ham is close to 400 for the same size. Gravy adds more!

133. Watch out for appetizers! Fill a small plate, and don't come back for seconds.

134. Don't go nuts--- 1/2 cup of mixed nuts contains about 400 calories!

135. Don't drop the good habits. Keep up the good work over the holidays

136. It's okay to say "no" when you have had enough to eat.

137. Choose your indulgences carefully.

138. Don't make food the holiday focus: family, friendship, and laughter are better than food.

139. Go easy on the alcohol to save room for dessert.

140. Skip the dressings, butter, and gravy.

141. Eat 70% vegetables and 30% other foods.

142. Superbowl tip: Get up and walk during half time and commercials (or during the game if it's the commercials you like). If you want to watch it all, try and get a workout in before the big game!

For peer review only

41  
42  
43  
44  
45  
46  
47  
48  
49  
50  
51  
52  
53  
54  
55  
56  
57  
58  
59  
60



2 **Appendix III: Consent Form**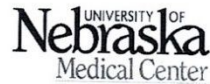

IRB PROTOCOL # 594-17-EP

Page 1 of 9

**ADULT CONSENT - CLINICAL BIOMEDICAL****Title of this Research Study**

The Rural Men's Health Study

**Invitation**

You are invited to take part in this research study. The information in this form is meant to help you decide whether or not to take part. If you have any questions, please ask.

**Why are you being asked to be in this research study?**

You are being asked to be in this study because you are a 40 to 69 year old man, reside in the Northeast Nebraska region, your Body Mass Index (BMI) is 28 or higher (BMI 50 or greater with clinician clearance, less than 396 pounds), you are a smartphone owner with enabled text messaging, you speak and read English, have an email account, you have no health problems that would prevent you from becoming more physically active, and you are willing to share your self-monitoring logs from the Lose-It app with the investigative team.

**What is the reason for doing this research study?**

Rural men are less likely than the general population to receive diet and exercise counseling for weight loss. Men with BMI of 28 to 49 are classified as overweight or obese BMI of 50 or higher is classified as morbidly obese. This population is at increased risk of developing a number of chronic diseases such as insulin resistance, type 2 (adult-onset) diabetes, high blood pressure, heart disease and stroke. The preferred treatment for weight reduction is lifestyle modifications that include a diet that is high in fruits, vegetables and low fat dairy products, and regular moderate intensity physical activity supplemented by resistance exercise. This research is trying to see if a technology enhanced self-monitoring approach is effective in increasing healthy eating and physical activity and reducing body weight. A total of 80 participants are expected to enroll in this study.

**What will be done during this research study?**

The study will last for six months. You will be asked to come to meet with a research nurse for an independent meeting at the Northeast Nebraska Public Health Department in Wayne, NE, three times at regular intervals (baseline, 3, 6 months) to complete surveys and physical assessments, which will take approximately 60-90 minutes. The physical assessments will include weight, height, body mass index, blood pressure, and heart rate. The individual contents of your written survey will only be shared with the research team. The surveys will include questions about your

IRBVersion 7

|                                                      |
|------------------------------------------------------|
| IRB<br>Approved 08/21/2019<br>Valid until 08/21/2020 |
|------------------------------------------------------|



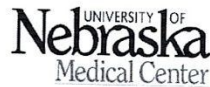

IRB PROTOCOL # 594-17-EP

Page 2 of 9

health status, your eating and physical activity patterns, and your perceptions about technology.

Immediately after the baseline visit, you will be randomly assigned (as by the roll of a die) in a 1:1 ratio to one of two groups. All subjects will be assigned a temporary email address, that contains no personal identifiers, that will be used to create a Lose-It app account. At the end of the study, you will have the option to choose to obtain personal ownership of your Lose-It account. If you choose to obtain personal ownership of your account, our research staff will assist you in entering a new username and password. However, please be advised that our study will not pay for further access to the Lose-It app. Future access to Lose-It premium will require you pay the current market rate for the app. If you choose to forego a change of ownership, your Lose-It account will be deleted 30 days after completing the study. If you are in group 1, you will have access to Lose-It Premium app, receive daily text messaging, participate in an online social comparison group with other members of group 1, and receive a WiFi Smartscale for daily weighing over the next 6 months. If you are in Group 2, you will have access to the Lose-It Basic app to self-monitor your eating and activity for the next 6 months. Both groups will have access to the research nurse for questions and will receive assessments at 3 and 6 months.

An overview of the procedures you will participate in during the study office visits are outlined in the attached table: Schedule of Procedures.

In addition to the brief questionnaires collected at baseline, 3, and 6 months, you will be randomly invited to participate in a focus group interview (approximately 90 minutes) at the end of the study (3 months) at the same community center where your assessments were collected. The questions for the interviews and focus groups will be: 1) What was the most helpful aspect of this study? 2) What other support would have helped you reach your goals? 3) Other comments. The interviews and focus groups will be recorded and analyzed to determine the major themes. Audio recordings of the focus groups will be destroyed after checked against the written transcripts for accuracy. At the end of the study, your temporary email account and attached Lose-It account will be deleted. You will have the option to set up a new Lose-It Basic account for free if you choose to continue using the app after the completion of the study.

#### **What are the possible risks of being in this research study?**

The possible risks of the procedures for assessing the biomarkers (resting blood pressure and resting heart rate) can be compared to procedures used in routine medical care and/or screens (i.e., blood pressure or heart rate measurement).

IRBVersion 7

|                                                      |
|------------------------------------------------------|
| IRB<br>Approved 08/21/2019<br>Valid until 08/21/2020 |
|------------------------------------------------------|

49  
50  
51  
52  
53  
54  
55  
56  
57  
58  
59  
60

Page 27 of 46

1  
2

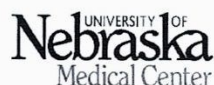

IRB PROTOCOL # 594-17-EP

Page 3 of 9

**Assessment of Behavioral Markers:** The assessments include no sensitive questions and pose no risks to you beyond possible but unlikely fatigue during completion of the survey. If you become fatigued, you can take a break or complete the assessment on another day.

**Assessment of Biomarkers:** The likelihood of risks associated with the assessment of all biomarkers is small, and the seriousness of those risks is minimal. The exertion levels are the same as for those associated with routine clinician visit screenings.

**Alternative Treatments and Procedures:** You can obtain guidance from your primary care provider or follow self-directed programs of behavior change. The assessments provided might be available from health clubs or other facilities, but there would be a cost associated.

**Use of smart phone to track physical activity:** The risks associated with wearing your smart phone for tracking physical activity are minor discomfort and nuisance from wearing the device on the hip or pocket during waking hours.

Loss of confidentiality is a risk to participating in the study. You may find completing the written surveys and health assessments inconvenient or tiring. The research nurse will schedule all assessment sessions at times convenient for you, and you may call him/her at the number listed at the end of this form to reschedule if necessary. If you become tired before completing the survey or health assessments, you may take a break. Loss-it Connect or the over-air of the Lose-It app will not have access to any personal identifiable information about you or any other subjects in the study.

You may experience the following risks and discomforts as a result of each part of the physical assessment:

**Resting Blood Pressure:** arm discomfort during the procedure related to compression by the blood pressure cuff.

All of the tests will be administered by an experienced licensed or certified healthcare professional who will provide you with instruction and support during testing.

It is possible that other rare side effects could occur that are not described in this consent form. It is also possible that you could have a side effect that has not occurred before.

IRB Version 7

|                                                      |
|------------------------------------------------------|
| IRB<br>Approved 08/21/2019<br>Valid until 08/21/2020 |
|------------------------------------------------------|

53  
54  
55  
56  
57  
58  
59  
60

1  
2

**What are the possible benefits to you?**

You may learn about weight loss through self-monitoring of healthy eating and physical activity. If you adopt healthier eating and physical activity lifestyle behaviors, you may experience weight loss as well as promote health, prevent disability and/or premature death, and enhance quality of life as you age. You also may benefit from an improvement in cardiorespiratory (heart) fitness, increases in muscular strength, and percent body fat. You may not get any benefit from being in this research study.

**What are the possible benefits to other people?**

Cost-effective interventions that are acceptable to rural men and effective in achieving preventive health behavior change have the potential for decreasing health care costs by preventing chronic diseases and maintaining functional ability. This research protocol may provide a care delivery model that can be used by other providers of primary preventive services to rural clients. There may not be benefits to other people.

**What are the alternatives to being in this research study?**

You might obtain guidance from your primary health care provider about healthy eating and physical activity or follow a self-directed program of lifestyle behavior change for weight loss. The assessments provided might be available to you at health clubs or other facilities, but there would be a cost involved.

**What will being in this research study cost you?**

There is no cost to you to be in this research study. You will not be paid or reimbursed for transportation costs to and from the study site.

**Will you be paid for being in this research study?**

You will not be paid for transportation costs to and from the study site. Your compensation will be determined by the intervention arm to which you are randomly selected. Men in the MT+ intervention arm will receive the Lose-It Premium app (40.00) and a Nokia Body+ Wi-Fi scale (100.00), which they will be able to keep at the end of the study. Men randomized to the MT intervention arm will receive a stipend of \$25 for each of the 3 assessment sessions. To receive payment you must provide your social security number, name, and address in order to comply with Internal Revenue service (IRS) reporting requirements. When payment is reported to the IRS, we will not say what the payment is for, only that you have been paid. If you do not wish to provide this information, you can still participate in the study; however, you will not be paid. Checks will be mailed at the end of 6 months of your participation after your final study visit.

53  
54  
55  
56  
57  
58  
59  
60

Page 29 of 46

1  
2

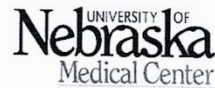

IRB PROTOCOL # 594-17-EP

Page 5 of 9

**Who is paying for this research?**

This research is being paid for by grant funds from the National Institute for Nursing Research. The University of Nebraska Medical Center College of Nursing receives money from the National Institute for Nursing Research to conduct this study.

**What should you do if you are injured or have a medical problem during this research study?**

If you are injured or have a medical problem as a result of being in this study, you should immediately contact one of the people listed at the end of this consent form.

**How will information about you be protected?**

You have rights regarding the privacy of your medical information collected before and during this research. This medical information, called "protected health information" (PHI), typically may include, depending upon the nature of this research, demographic information (like your address and birth date), the results of physical exams, as well as your medical history.

By signing this consent form, you are allowing the research team to have access to your PHI. The research team includes the investigators listed on this consent form and other personnel involved in this specific study at UNMC. Your PHI will be used only for the purpose(s) described in the section "What is the reason for doing this research study?"

To help us protect your privacy, we have obtained a Certificate of Confidentiality from the National Institutes of Health. The researchers can use this Certificate to legally refuse to disclose information that may identify you in any federal, state, or local civil, criminal, administrative, legislative, or other proceedings, for example, if there is a court subpoena. The researchers will use the Certificate to resist any demands for information that would identify you, except as explained below.

The Certificate cannot be used to resist a demand for information from personnel of the United States Government that is used for auditing or evaluation of federally funded projects or for information that must be disclosed in order to meet the requirements of the federal Food and Drug Administration (FDA).

You should understand that a Certificate of Confidentiality does not prevent you or a member of your family from voluntarily releasing information about yourself or your involvement in this research. If an insurer, employer, or other person obtains your written consent to receive information, then the researchers may not use the Certificate to withhold that information.

IRBVersion 7

|                                                      |
|------------------------------------------------------|
| IRB<br>Approved 08/21/2019<br>Valid until 08/21/2020 |
|------------------------------------------------------|

53  
54  
55  
56  
57  
58  
59  
60

1  
2



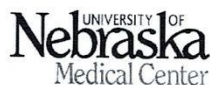

IRB PROTOCOL # 594-17-EP

Page 6 of 9

The Certificate of Confidentiality will not be used to prevent disclosure to state or local authorities of child abuse and neglect, or harm to self or others.

**Who will have access to information about you?**

Your PHI will be shared, as necessary, with the Institutional Review Board (IRB) and with any person or agency required by law. You are also allowing the research team to share your PHI with other people or groups listed below. All of these persons or groups listed below are obligated to protect your PHI.

By signing this consent form, you are allowing the research team to have access to your PHI. The research team includes the investigators listed on this consent form and other personnel involved in this specific study at the Institution.

Your PHI will be used only for the purpose(s) described in the section What is the reason for doing this research study?

You are also allowing the research team to share your PHI, as necessary, with other people or groups listed below:

- The UNMC Institutional Review Board (IRB)
- Institutional officials designated by the UNMC IRB
- Federal law requires that your information may be shared with these groups:
  - The HHS Office of Human Research Protections (OHRP)
  - National Institutes of Health (NIH)

You are authorizing us to use and disclose your PHI for as long as the research study is being conducted. You may cancel your authorization for further collection of PHI for use in this research at any time by contacting the principal investigator in writing. However, the PHI which is included in the research data obtained to date may still be used. If you cancel this authorization, you will no longer be able to participate in this research.

**How will results of the research be made available to you during and after the study is finished?**

The information from this study may be published in scientific journals or presented at scientific meetings but your identity will be kept strictly confidential.

A description of this clinical trial will be available on [www.ClinicalTrials.gov](http://www.ClinicalTrials.gov), as required by U.S. law. This website will not include information that can identify you. At most, the website will include a summary of the results. You can search this website

IRBVersion 7

|                                                      |
|------------------------------------------------------|
| IRB<br>Approved 08/21/2019<br>Valid until 08/21/2020 |
|------------------------------------------------------|

53  
54  
55  
56  
57  
58  
59  
60

Page 31 of 46

1  
2

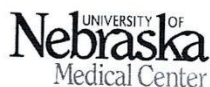

IRB PROTOCOL # 594-17-EP

Page 7 of 9

at any time.

**What will happen if you decide not to be in this research study?**

You can decide not to be in this research study. Deciding not to be in this research study will not affect your medical care or your relationship with the investigator, the University of Nebraska Medical Center or the Nebraska Medical Center. Your doctor will still take care of you and you will not lose any benefits to which you are entitled.

**What will happen if you decide to stop participating once you start?**

You can stop being in this research study (withdraw) at any time before, during, or after the treatment begins. Your doctor will still take care of you though you may not be able to get the research treatment. Deciding to withdraw will otherwise not affect your care or your relationship with the investigator, the University of Nebraska Medical Center, or the Nebraska Medical Center. You will not lose any benefits to which you are entitled.

**Will you be given any important information during the study?**

You will be informed promptly if the research team gets any new information during this research study that may affect whether you want to continue being in the study.

**What should you do if you have any questions about the study?**

You have been given a copy of "What do I need to know before being in a research study?" If you have any questions at any time about this study, you should contact the Principal Investigator or any of the study personnel listed on this consent form or any other documents that you have been given.

**What are your rights as a research participant?**

You have rights as a research subject. These rights have been explained in this consent form and in *The Rights of Research Subjects* that you have been given. If you have any questions concerning your rights or want to discuss problems, concerns, obtain information or offer input, or make a complaint about the research, you can contact any of the following:

- The investigator or other study personnel
- Institutional Review Board (IRB) by
- Telephone: (402) 559-6463
- Email: [IRBORA@unmc.edu](mailto:IRBORA@unmc.edu)
- Mail: UNMC Institutional Review Board, 987830 Nebraska Medical Center, Omaha, NE 68198-7830.
- Research subject advocate
- Telephone 402-559-6941

IRBVersion 7

|                                                      |
|------------------------------------------------------|
| IRB<br>Approved 08/21/2019<br>Valid until 08/21/2020 |
|------------------------------------------------------|

53  
54  
55  
56  
57  
58  
59  
60

1  
2

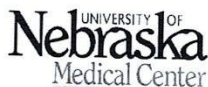

IRB PROTOCOL # 594-17-EP

Page 8 of 9

- Email: unmcrsa@unmc.edu

**Documentation of informed consent**

You are freely making a decision whether to be in this research study. Signing this form means that:

- You have read and understood this consent form.
- You have had the consent form explained to you.
- You have been given a copy of The Rights of Research Subjects
- You have had your questions answered.
- You have decided to be in the research study.
- If you have any questions during the study, you have been directed to talk to one of the investigators listed below on this consent form.
- You will be given a signed and dated copy of this consent form to keep.

Signature of Subject \_\_\_\_\_  
Date \_\_\_\_\_

My signature certifies that all the elements of informed consent described on this consent form have been explained fully to the subject. In my judgment, the subject possesses the legal capacity to give informed consent to participate in this research and is voluntarily and knowingly giving informed consent to participate.

Signature of Person obtaining consent \_\_\_\_\_  
Date: \_\_\_\_\_

For peer review only

**Authorized Study Personnel**

**Principal**

\* Eisenhauer, Christine  
phone: 402-844-7897  
alt #: 402-844-7897  
degree: PhD, APRN-CNS

**Secondary**

\* Hageman, Patricia  
phone: 402-559-1967  
alt #: 402-559-1967  
degree: PhD, PT

\* Pullen, Carol  
phone: 402-559-6548  
alt #: 402-559-6548  
degree: Ed.D., RN

\* Silva, Fabiana

\* Yoder, Aaron

IRBVersion 7

IRB  
Approved 08/21/2019  
Valid until 08/21/2020

53  
54  
55  
56  
57  
58  
59  
60

Page 33 of 46

1  
2

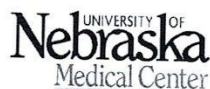

IRB PROTOCOL # 594-17-EP

Page 8 of 9

- Email: unmcrsa@unmc.edu

**Documentation of informed consent**

You are freely making a decision whether to be in this research study. Signing this form means that:

- You have read and understood this consent form.
- You have had the consent form explained to you.
- You have been given a copy of The Rights of Research Subjects
- You have had your questions answered.
- You have decided to be in the research study.
- If you have any questions during the study, you have been directed to talk to one of the investigators listed below on this consent form.
- You will be given a signed and dated copy of this consent form to keep.

Signature of Subject \_\_\_\_\_  
Date \_\_\_\_\_

My signature certifies that all the elements of informed consent described on this consent form have been explained fully to the subject. In my judgment, the subject possesses the legal capacity to give informed consent to participate in this research and is voluntarily and knowingly giving informed consent to participate.

Signature of Person obtaining consent \_\_\_\_\_  
Date \_\_\_\_\_

For peer review only

**Authorized Study Personnel**

**Principal**

\* Eisenhauer, Christine  
phone: 402-844-7897  
alt #: 402-844-7897  
degree: PhD, APRN-CNS

**Secondary**

\* Hageman, Patricia  
phone: 402-559-1967  
alt #: 402-559-1967  
degree: PhD, PT

\* Pullen, Carol  
phone: 402-559-6548  
alt #: 402-559-6548  
degree: Ed.D., RN

\* Silva, Fabiana

\* Yoder, Aaron

IRBVersion 7

|                                                      |
|------------------------------------------------------|
| IRB<br>Approved 08/21/2019<br>Valid until 08/21/2020 |
|------------------------------------------------------|

53  
54  
55  
56  
57  
58  
59  
60

1  
2



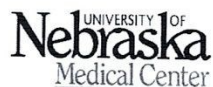

IRB PROTOCOL # 594-17-EP

Page 9 of 9

phone: 402-559-6627  
alt #: 402-559-6627  
degree: PhD

phone: 402-552-7240  
alt #: 814-577-9127  
degree: PhD

**Participating Personnel**

\* Castaneda, Georgina  
alt #: 402-375-2200  
degree: CHW

\* Miller, Jessica  
phone: 402-844-7923  
alt #: 402-340-4699  
degree: RN, BSN

\* Salinas, Katherine (Katie)  
phone: 402-559-6025  
alt #: 402-255-0504  
degree: RN, BSN

\* Zarate, Victor  
alt #: 402-375-2200  
degree: CHW

For peer review only

IRBVersion 7

IRB  
Approved 08/21/2019  
Valid until 08/21/2020

53  
54  
55  
56  
57  
58  
59  
60

Page 35 of 46

1  
2

## Institutional Review Board (IRB)

What Do I Need To Know  
Before Being In A Research Study?

You have been invited to be in a **research study**. Research studies are also called "clinical trials" or "protocols." **Research** is an organized plan designed to get new knowledge about a disease or the normal function of the body. The people who are in the research are called **research subjects**. The **investigator** is the person who is running the research study. You will get information from the investigator and the research team, and then you will be asked to give your **consent** to be in the research.

**This sheet will help you think of questions to ask the investigator or his/her staff. You should know all these answers before you decide about being in the research.**

What is the **purpose** of the research? Why is the investigator doing the research?

What are the **risks** of the research? What bad things could happen?

What are the possible **benefits** of the research? How might this help me?

**How is this research different** than the care or treatment I would get if I wasn't in the research? Are there other treatments I could get?

Does **everyone** in this research study get the same treatment?

Will being in the research **cost** me anything extra?

Do I have to be in this research study? Will the doctor still take care of me if I say **no**?

Can I **stop** being in the research once I've started? How?

Who will look at my **records**?

How do I reach the investigator if I have more **questions**?

Who do I call if I have questions about being a **research subject**?

**Make sure all your questions are answered before you decide whether or not to be in this research.**

Academic Research & Services Building 3000 / 987830 Nebraska Medical Center / Omaha NE 68198-7830  
402-559-6463 / FAX 402-559-3300 / Email: irbora@unmc.edu / <http://www.unmc.edu/irb>

53  
54  
55  
56  
57  
58  
59  
60

1  
2

Institutional Review Board (IRB)

## THE RIGHTS OF RESEARCH SUBJECTS AS A RESEARCH SUBJECT YOU HAVE THE RIGHT

**to be told everything you need to know about the research before you are asked to decide whether or not to take part in the research study.** The research will be explained to you in a way that assures you understand enough to decide whether or not to take part.

**to freely decide whether or not to take part in the research.**

**to decide not to be in the research, or to stop participating in the research at any time.** This will not affect your medical care or your relationship with the investigator or the Nebraska Medical Center. Your doctor will still take care of you.

**to ask questions about the research at any time.** The investigator will answer your questions honestly and completely.

**to know that your safety and welfare will always come first.** The investigator will display the highest possible degree of skill and care throughout this research. Any risks or discomforts will be minimized as much as possible.

**to privacy and confidentiality.** The investigator will treat information about you carefully, and will respect your privacy.

**... to keep all the legal rights you have now.** You are not giving up any of your legal rights by taking part in this research study.

**to be treated with dignity and respect at all times.**  
The Institutional Review Board is responsible for assuring that your rights and welfare are protected. If you have any questions about your rights, contact the Institutional Review Board at (402) 559-6463.

Academic Research & Services Building 3000 / 987830 Nebraska Medical Center / Omaha NE 68198-7830  
402-559-6463 / FAX 402-559-3300 / Email: irbora@unmc.edu / <http://www.unmc.edu/irb>

53  
54  
55  
56  
57  
58  
59  
60

**Figure 1: Participant Timeline**

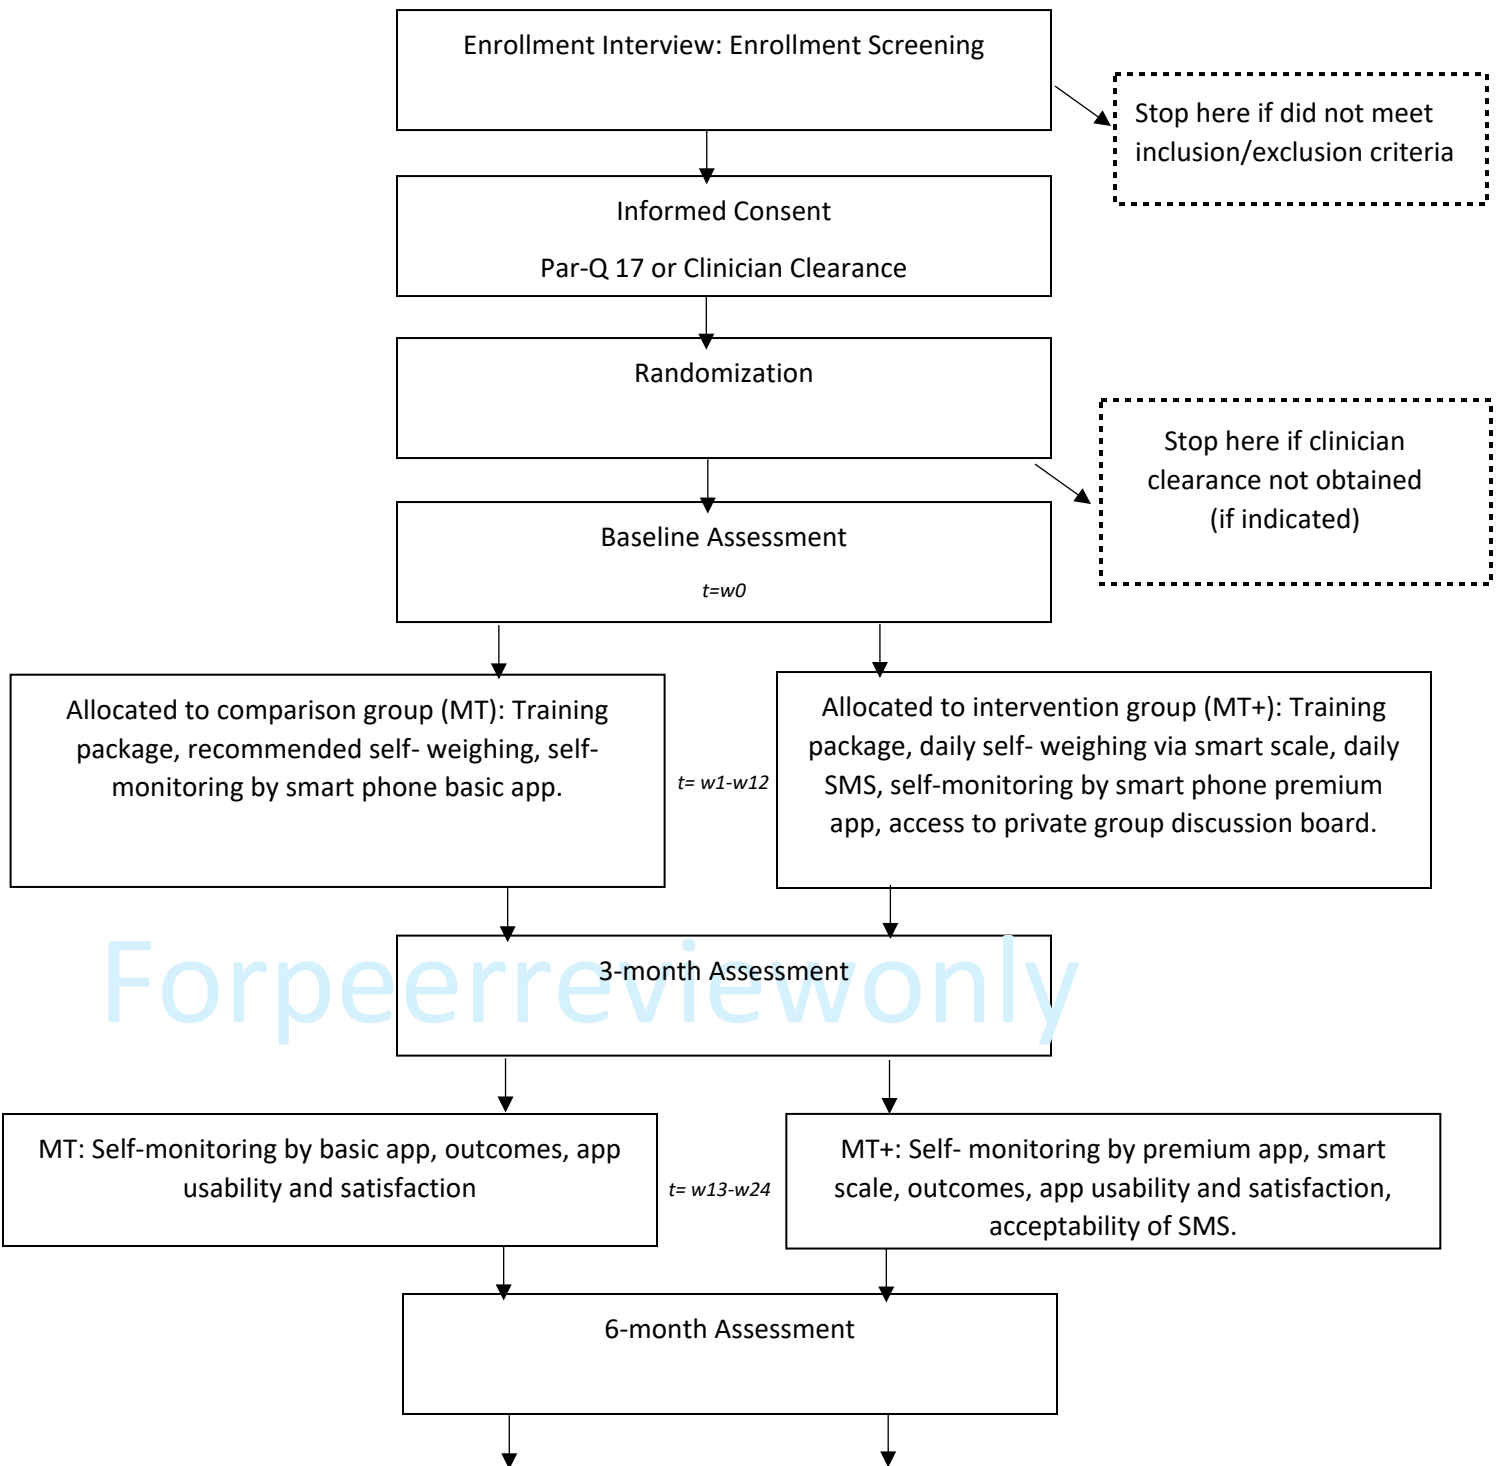

1  
2  
3  
4  
5  
6  
7  
8

9  
10  
11  
12  
13  
14  
15  
16  
17  
18  
19  
20  
21  
22  
23  
24  
25  
26  
27  
28  
29  
30  
31  
32  
33  
34  
35  
36  
37  
38  
39  
40  
41  
42  
43  
44  
45  
46  
47  
48  
49  
50  
51  
52  
51  
52  
53  
54  
55  
56  
57  
58  
59  
60

MT: Outcomes

t= w25+

MT+: Outcomes, Focus Groups



1  
2  
53  
54  
55  
56  
57  
58  
59

60 Page 38 of 46

3  
4  
5  
6

# Reporting checklist for protocol of a clinical trial.

7  
8  
9  
10

Based on the SPIRIT guidelines.

11  
12  
13

## Instructions to authors

14  
15

Complete this checklist by entering the page numbers from your manuscript where readers will find

51  
52  
53  
54  
55  
56  
57  
58  
59  
60

Your article may not currently address all the items on the checklist. Please modify your text to include the missing information. If you are certain that an item does not apply, please write "n/a" and

Upload your completed checklist as an extra file when you submit to a journal.

In your methods section, say that you used the SPIRIT reporting guidelines, and cite them as:

Chan A-W, Tetzlaff JM, Altman DG, Laupacis A, Gøtzsche PC, Krleža-Jerić K, Hróbjartsson A, Mann H, Dickersin K, Berlin J, Doré C, Parulekar W, Summerskill W, Groves T, Schulz K, Sox H, Rockhold FW, Rennie D, Moher D. SPIRIT 2013 Statement: Defining standard protocol items for clinical trials.

each of the items listed below.

provide a short explanation.

17  
18  
19  
20  
21  
22  
23  
24  
25  
26  
27  
28  
29  
30  
31  
32  
51  
52  
53  
54  
55  
56  
57  
58  
59  
60

1  
2  
33  
34  
35  
36  
37  
38  
39  
40  
41  
42  
43  
44  
45  
46  
47  
48  
49  
50  
51  
52  
53  
54  
55  
56  
57  
58  
59  
60

Ann Intern Med. 2013;158(3):200-207

Page

Reporting Item

Number

**Administrative**

**information**

|       |                                                                                                                 |   |
|-------|-----------------------------------------------------------------------------------------------------------------|---|
| Title | #1 Descriptive title identifying the study design, population, interventions, and, if applicable, trial acronym | 1 |
|-------|-----------------------------------------------------------------------------------------------------------------|---|

Page 39 of 46

|                    |                                                                                          |   |
|--------------------|------------------------------------------------------------------------------------------|---|
| Trial registration | #2a Trial identifier and registry name. If not yet registered, name of intended registry | 2 |
|--------------------|------------------------------------------------------------------------------------------|---|

|                          |                                                        |   |
|--------------------------|--------------------------------------------------------|---|
| Trial registration: data | #2b All items from the World Health Organization Trial | 2 |
|--------------------------|--------------------------------------------------------|---|

9 set Registration Data Set

10  
11  
12 Protocol version #3 Date and version identifier

2

13  
14  
15 Funding2 #4 Sources and types of financial, material, and other support

16  
17 #5a Names, affiliations, and roles of protocol contributors

18  
19 Roles and 2

20  
21 responsibilities:

22  
23 contributorship #5b Name and contact information for the trial sponsor

24  
25  
26 Roles and 2

27  
28 responsibilities:

29 #5c Role of study sponsor and funders, if any, in study design;

30  
31 sponsor contact collection, management, analysis, and interpretation of

32  
33 information data; writing of the report; and the decision to submit the

34  
35 report for publication, including whether they will have

36 Roles and 11

37  
38 responsibilities:

39  
40  
41 sponsor and funder

1  
2  
44  
45 ultimate authority over any of these activities  
46  
47

48 Roles and [#5d](#) Composition, roles, and responsibilities of the coordinating 11  
49

50 responsibilities: centre, steering committee, endpoint adjudication committees

committee, data management team, and other individuals

or groups overseeing the trial, if applicable (see Item 21a

for data monitoring committee)

51  
52  
53  
54  
55  
56  
57  
58  
59  
60

## Introduction

|    |                      |                     |                                                                   |   |
|----|----------------------|---------------------|-------------------------------------------------------------------|---|
| 8  | Background and       | <a href="#">#6a</a> | Description of research question and justification for            | 3 |
| 9  | rationale            |                     | undertaking the trial, including summary of relevant studies      |   |
| 10 |                      |                     | (published and unpublished) examining benefits and harms          |   |
| 11 |                      |                     | for each intervention                                             |   |
| 12 |                      |                     |                                                                   |   |
| 13 |                      |                     |                                                                   |   |
| 14 |                      |                     |                                                                   |   |
| 15 | Background and 3     | <a href="#">#6b</a> | Explanation for choice of comparators                             |   |
| 16 |                      |                     |                                                                   |   |
| 17 | rationale: choice of |                     |                                                                   |   |
| 18 |                      |                     |                                                                   |   |
| 19 | comparators          |                     |                                                                   |   |
| 20 |                      | <a href="#">#7</a>  | Specific objectives or hypotheses                                 |   |
| 21 |                      |                     |                                                                   |   |
| 22 | Objectives3-4        | <a href="#">#8</a>  | Description of trial design including type of trial (eg, parallel |   |
| 23 |                      |                     | group, crossover, factorial, single group), allocation ratio,     |   |
| 24 |                      |                     | and framework (eg, superiority, equivalence, non-inferiority,     |   |
| 25 | Trial design4        |                     | exploratory)                                                      |   |
| 26 |                      |                     |                                                                   |   |
| 27 |                      |                     |                                                                   |   |
| 28 |                      |                     |                                                                   |   |
| 29 |                      |                     |                                                                   |   |
| 30 |                      |                     |                                                                   |   |
| 31 |                      |                     |                                                                   |   |
| 32 |                      |                     |                                                                   |   |
| 33 |                      |                     |                                                                   |   |
| 34 |                      |                     |                                                                   |   |

## Methods:

1  
2  
3  
4  
5  
6  
7  
37  
38  
39  
40  
41  
42  
43  
44  
45  
46  
47  
48  
49  
50  
  
51  
52  
53  
54  
55  
56  
57  
58  
59  
60

**Participants,  
interventions, and  
outcomes**

Study setting [#9](#) Description of study settings (eg, community clinic, academic hospital) and list of countries where data will be collected. Reference to where list of study sites can be obtained 4

Eligibility criteria [#10](#) Inclusion and exclusion criteria for participants. If applicable, eligibility criteria for study centres and individuals who will perform the interventions (eg, surgeons, psychotherapists) 4

Interventions: [#11a](#) Interventions for each group with sufficient detail to allow 5

7

8 description replication, including how and when they will be

9

10

11 administered

12

13

14 Interventions: [#11b](#) Criteria for discontinuing or modifying allocated 5

15

16 modifications interventions for a given trial participant (eg, drug dose

17

18 change in response to harms, participant request, or

19

20

21 improving / worsening disease)

22

23

24 Interventions: [#11c](#) Strategies to improve adherence to intervention protocols, 5,6

25

26 adherence and any procedures for monitoring adherence (eg, drug

27

28 tablet return; laboratory tests)

29

30

31 Interventions: [#11d](#) Relevant concomitant care and interventions that are 5

32

33

34 concomitant care permitted or prohibited during the trial

35

36

37 Outcomes [#12](#) Primary, secondary, and other outcomes, including the 6

38

39 specific measurement variable (eg, systolic blood

40

41 pressure), analysis metric (eg, change from baseline, final

51

52

53

54

55

56

57

58

59

60



1  
2  
3  
4  
5  
6  
7  
42  
43 value, time to event), method of aggregation (eg, median,  
44  
45  
46 proportion), and time point for each outcome. Explanation  
47  
48 of the clinical relevance of chosen efficacy and harm  
49  
50 outcomes is strongly recommended

|                      |                     |                                                                                                                                                                     |   |
|----------------------|---------------------|---------------------------------------------------------------------------------------------------------------------------------------------------------------------|---|
| Participant timeline | <a href="#">#13</a> | Time schedule of enrolment, interventions (including any run-ins and washouts), assessments, and visits for participants. A schematic diagram is highly recommended | 7 |
|                      |                     | (see Figure)                                                                                                                                                        |   |

Page 42 of 46

|             |                     |                                                                                                                                                                                       |     |
|-------------|---------------------|---------------------------------------------------------------------------------------------------------------------------------------------------------------------------------------|-----|
| Sample size | <a href="#">#14</a> | Estimated number of participants needed to achieve study objectives and how it was determined, including clinical and statistical assumptions supporting any sample size calculations | 3-4 |
|-------------|---------------------|---------------------------------------------------------------------------------------------------------------------------------------------------------------------------------------|-----|

[#15](#) Strategies  
adequate participant  
4,7

reach target sample size

15  
16  
17  
18

**Methods: Assignment**

[#16a](#) Method of generating the allocation sequence (eg,  
computer-generated random numbers), and list of any  
factors for stratification. To reduce predictability of a  
random sequence, details of any planned restriction (eg,  
blocking) should be provided in a separate document that is

of interventions (for  
controlled trials)

Allocation: sequence  
generation

unavailable to those who enrol participants or assign  
interventions

3,7

30  
31  
32  
33  
34  
35  
36  
37  
38  
39  
40  
41  
42

[#16b](#) Mechanism of implementing the allocation sequence (eg,

Allocation 7

concealment

central telephone; sequentially numbered, opaque, sealed

51  
52  
53  
54  
55  
56  
57  
58  
59  
60

1  
2  
3  
4  
5  
6  
7  
47  
48  
49  
50  
  
Allocation:  
  
6-7  
  
7  
  
8  
  
9  
10  
11  
12  
13  
  
  
  
51  
52  
53  
54  
55  
56  
57  
58  
59  
60

mechanism envelopes), describing any steps to conceal the sequence  
until interventions are assigned

#16c Who will generate the allocation sequence, who will enrol participants, and who will assign participants to interventions

Page 43 of 46

Blinding (masking) #17a Who will be blinded after assignment to interventions (eg, trial participants, care providers, outcome assessors, data analysts), and how 7

Blinding (masking): #17b If blinded, circumstances under which unblinding is emergency permissible, and procedure for revealing a participant's 7

14 unblinding allocated  
during the trial

15  
16

17 **Methods: Data**

18

19 **collection,**

20

21 **management, and**

22

23

24 **analysis**

25

26

27 Data collection plan 8

28

29

30

31

32

33

34

35

36

37

38

39

40

41

42

43

44

45

46

47

48

49

51

52

53

54

55

56

57

58

59

60

**#18a** Plans for assessment and collection of outcome, baseline, and other trial data, including any related processes to promote data quality (eg, duplicate measurements, training of assessors) and a description of study instruments (eg, questionnaires, laboratory tests) along with their reliability and validity, if known. Reference to where data collection forms can be found, if not in the protocol

**#18b** Plans to promote participant retention and complete follow-

Data collection plan: 9-10

retention up, including list of any outcome data to be collected for participants who discontinue or deviate from intervention

1  
2  
3  
4  
5  
6  
7

50

protocols

Data management [#19](#) Plans for data entry, coding, security, and storage, 10-11  
including any related processes to promote data quality  
(eg, double data entry; range checks for data values).

Page 44 of 46

Reference to where details of data management  
procedures can be found, if not in the protocol

Statistics: outcomes [#20a](#) Statistical methods for analysing primary and secondary 10  
outcomes. Reference to where other details of the  
statistical analysis plan can be found, if not in the protocol

8  
9  
10  
11  
12  
13

51  
52  
53  
54  
55  
56  
57  
58  
59  
60

14 Statistics: additional  
 15 \_\_\_\_\_ Methods for any  
 16 analyses (eg, subgroup

adjusted analyses)

17 analyses

[#20c](#) Definition of analysis population relating to protocol non-  
 adherence (eg, as randomised analysis), and any statistical  
 methods to handle missing data (eg, multiple imputation)

19 Statistics: analysis 10  
 20  
 21 population and

22  
 23 missing data

[#21a](#) Composition of data monitoring committee (DMC);  
 summary of its role and reporting structure; statement of  
 whether it is independent from the sponsor and competing  
 interests; and reference to where further details about its  
 charter can be found, if not in the protocol. Alternatively, an  
 explanation of why a DMC is not needed

27 **Methods: Monitoring**

30 Data monitoring: 11  
 31  
 32 formal committee

44 Data monitoring:  
 45  
 46  
 47 interim analysis

[#21b](#) Description of any interim analyses and stopping  
 guidelines, including who will have access to these interim

11

51  
 52  
 53  
 54  
 55  
 56  
 57  
 58  
 59  
 60

1  
2  
3  
4  
5  
6  
7  
48  
49  
50

results and make the final decision to terminate the trial

Harms

[#22](#) Plans for collecting, assessing, reporting, and managing solicited and spontaneously reported adverse events and other unintended effects of trial interventions or trial

11

Page 45 of 46

1  
2  
3  
4  
5  
6  
7  
8  
9  
10  
11  
12  
13

conduct

Auditing

[#23](#) Frequency and procedures for auditing trial conduct, if any, and whether the process will be independent from investigators and the sponsor

11

Ethics and

51  
52  
53  
54  
55  
56  
57  
58  
59  
60

## 14 dissemination

15  
16

17 Research ethics 11 #24 Plans for seeking research ethics committee / institutional  
18 review board (REC / IRB) approval

19 approval

20  
21

22 Protocol 11 #25 Plans for communicating important protocol modifications  
23 (eg, changes to eligibility criteria, outcomes, analyses) to  
24 relevant parties (eg, investigators, REC / IRBs, trial

25 amendments

26  
27

28 #26a Who will obtain informed consent or assent from potential  
29 trial participants or authorised surrogates, and how (see  
30 Item 32)

31  
32

33 Consent or assent7

34  
35

36 #26b Additional consent provisions for collection and use of  
37 participant data and biological specimens in ancillary  
38 studies, if applicable

39  
40

41 Consent or assent: n/a

42  
43

44 ancillary studies 43 44 studies, if applicable

45  
46

47 Confidentiality

48  
49

50 #27 How personal information about potential and enrolled  
51 participants will be collected, shared, and maintained in  
52 order to protect confidentiality before, during, and after the

11

53  
5455  
5657  
5859  
60



1  
2  
3  
4  
5  
6  
7

trial

|                |                                                                           |    |
|----------------|---------------------------------------------------------------------------|----|
| Declaration of | <a href="#">#28</a> Financial and other competing interests for principal | 12 |
| interests      | investigators for the overall trial and each study site                   |    |

|             |                                                                                                                                                                     |    |
|-------------|---------------------------------------------------------------------------------------------------------------------------------------------------------------------|----|
| Data access | <a href="#">#29</a> Statement of who will have access to the final trial dataset, and disclosure of contractual agreements that limit such access for investigators | 11 |
|-------------|---------------------------------------------------------------------------------------------------------------------------------------------------------------------|----|

8  
9  
10  
11

|                    |                                                                                    |    |
|--------------------|------------------------------------------------------------------------------------|----|
| Ancillary and post | <a href="#">#30</a> Provisions, if any, for ancillary and post-trial care, and for | 11 |
|--------------------|------------------------------------------------------------------------------------|----|

13

51  
52  
53  
54  
55  
56  
57  
58  
59  
60

14 trial  
compensation to those  
harm from trial

participation

15  
16  
17  
18  
19 Dissemination policy: 11

#31a Plans for investigators and sponsor to communicate trial  
results to participants, healthcare professionals, the public,  
and other relevant groups (eg, via publication, reporting in  
results databases, or other data sharing arrangements),  
including any publication restrictions

21 trial results

#31b Authorship eligibility guidelines and any intended use of  
professional writers

22  
23  
24  
25  
26  
27  
28  
29  
30  
31 Dissemination policy: 11

participant-level dataset, and statistical code

32  
33  
34 authorship

Dissemination policy: 11

35  
36  
37  
38  
39 reproducible research

## 42 Appendices

43  
44  
45 Informed consent [#32](#) Model consent form and other related documentation given 22-28

46  
  
51  
52  
53  
54  
55  
56  
57  
58  
59  
60

1  
2  
3  
4  
5  
6  
7

47 materials to participants and authorised surrogates

48  
49

50 Biological specimens [#33](#) Plans for collection, laboratory evaluation, and storage of n/a  
biological specimens for genetic or molecular analysis in the  
current trial and for future use in ancillary studies, if  
applicable

51  
52  
53  
54  
55  
56  
57  
58  
59  
60

The SPIRIT checklist is distributed under the terms of the Creative Commons Attribution License CCBY-ND 3.0. This checklist was completed on 17. October 2019 using <https://www.goodreports.org/>, a tool made by the [EQUATOR Network](#) in collaboration with [Penelope.ai](#)

Forpeerreviewonly

# BMJ Open

## MOBILE TECHNOLOGY INTERVENTION FOR WEIGHT LOSS IN RURAL MEN: PROTOCOL FOR A PILOT PRAGMATIC RANDOMIZED CONTROLLED TRIAL

|                                 |                                                                                                                                                                                                                                                                                                                                                                                                                                                                                                                                                                                                                                                                                                                           |
|---------------------------------|---------------------------------------------------------------------------------------------------------------------------------------------------------------------------------------------------------------------------------------------------------------------------------------------------------------------------------------------------------------------------------------------------------------------------------------------------------------------------------------------------------------------------------------------------------------------------------------------------------------------------------------------------------------------------------------------------------------------------|
| Journal:                        | <i>BMJ Open</i>                                                                                                                                                                                                                                                                                                                                                                                                                                                                                                                                                                                                                                                                                                           |
| Manuscript ID                   | bmjopen-2019-035089.R1                                                                                                                                                                                                                                                                                                                                                                                                                                                                                                                                                                                                                                                                                                    |
| Article Type:                   | Protocol                                                                                                                                                                                                                                                                                                                                                                                                                                                                                                                                                                                                                                                                                                                  |
| Date Submitted by the Author:   | 02-Jan-2020                                                                                                                                                                                                                                                                                                                                                                                                                                                                                                                                                                                                                                                                                                               |
| Complete List of Authors:       | <p>Eisenhauer, Christine; University of Nebraska Medical Center College of Nursing, Northern Division<br/> Brito, Fabiana; University of Nebraska Medical Center, College of Public Health<br/> Yoder, Aaron; University of Nebraska Medical Center, College of Public Health<br/> Kupzyk, Kevin; University of Nebraska Medical Center College of Nursing<br/> Pullen, Carol; University of Nebraska Medical Center College of Nursing<br/> Salinas, Katherine; University of Nebraska Medical Center College of Nursing<br/> Miller, Jessica; University of Nebraska Medical Center College of Nursing, Northern division<br/> Hageman, Patricia; University of Nebraska Medical Center, Physical Therapy Education</p> |
| <b>Primary Subject Heading</b>: | Nursing                                                                                                                                                                                                                                                                                                                                                                                                                                                                                                                                                                                                                                                                                                                   |
| Secondary Subject Heading:      | Public health                                                                                                                                                                                                                                                                                                                                                                                                                                                                                                                                                                                                                                                                                                             |

|           |                                                  |
|-----------|--------------------------------------------------|
| Keywords: | PUBLIC HEALTH, PRIMARY CARE, PREVENTIVE MEDICINE |
|           |                                                  |

SCHOLARONE™  
Manuscripts

1

BMJ Open

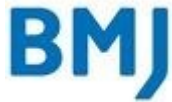

2

3 I, the Submitting Author has the right to grant and does grant on behalf of all authors of the Work (as defined in  
4 the below author licence), an exclusive licence and/or a non-exclusive licence for contributions from authors who  
5 are: i) UK Crown employees; ii) where BMJ has agreed a CC-BY licence shall apply, and/or iii) in accordance with  
6 the terms applicable for US Federal Government officers or employees acting as part of their official duties; on a  
7 worldwide, perpetual, irrevocable, royalty-free basis to BMJ Publishing Group Ltd ("BMJ") its licensees and where  
8 the relevant Journal is co-owned by BMJ to the co-owners of the Journal, to publish the Work in this journal and  
9 any other BMJ products and to exploit all rights, as set out in our [licence](#).

The Submitting Author accepts and understands that any supply made under these terms is made by BMJ to the Submitting Author unless you are acting as an employee on behalf of your employer or a postgraduate student of an affiliated institution which is paying any applicable article publishing charge ("APC") for Open Access articles. Where the Submitting Author wishes to make the Work available on an Open Access basis (and intends to pay the relevant APC), the terms of reuse of such Open Access shall be governed by a Creative Commons licence – details of these licences and which [Creative Commons](#) licence will apply to this Work are set out in our licence referred to above.

Other than as permitted in any relevant BMJ Author's Self Archiving Policies, I confirm this Work has not been accepted for publication elsewhere, is not being considered for publication elsewhere and does not duplicate material already published. I confirm all authors consent to publication of this Work and authorise the granting of this licence.

For peer review only

10





1  
2  
3 **MOBILE TECHNOLOGY INTERVENTION FOR WEIGHT LOSS IN RURAL MEN:**  
4  
5 **PROTOCOL FOR A PILOT PRAGMATIC RANDOMIZED CONTROLLED TRIAL**  
6

7 Christine M. Eisenhauer, PhD, CNE, APRN-CNS, PHCNS-BC  
8 University of Nebraska Medical Center College of Nursing  
9

10 Norfolk, NE. United States  
11

12 Fabiana Brito, PhD, MSPH, BSN  
13 University of Nebraska Medical Center College of Public Health  
14

15 Omaha, NE. United States  
16

17 Aaron Yoder, PhD  
18 University of Nebraska Medical Center College of Public  
19 Health  
20

21 Omaha, NE. United States  
22

23 Kevin Kupzyk, PhD  
24 University of Nebraska Medical Center College of  
25 Nursing  
26

27 Omaha, NE. United States  
28

29 Carol Pullen, EdD, RN  
30 University of Nebraska Medical Center College of Nursing  
31 Omaha, NE. United States  
32

33 Katherine Salinas, RN, BSN  
34 University of Nebraska Medical Center College of Nursing  
35 Omaha, NE. United States  
36

37 Jessica Miller, RN, BSN  
38 University of Nebraska Medical Center College of Nursing  
39 Norfolk, NE. United States  
40

41 Patricia A.Hageman, PT, PhD, FAPTA,  
42

43 University of Nebraska Medical Center College of Allied  
44 Health  
45 Omaha, NE. United States  
46

47 **Corresponding Author:**

48 Christine Eisenhauer 49 801  
49 East Benjamin Avenue,

50 Norfolk, NE 68701

51 [ceisenhauer@unmc.edu](mailto:ceisenhauer@unmc.edu); 402-844-7897  
52

53  
54 Word Count: 4342  
55  
56  
57  
58  
59  
60

2

1  
2  
3 **ABSTRACT**  
4

5 **Introduction:** Overweight-obese men in the rural Midwestern United States are an  
6 unrepresented, at-risk group exhibiting rising rates of cardiovascular disease, poor access to  
7 preventive care, and poor lifestyle behaviors that contribute to sedentary lifestyle and unhealthy  
8 diet. Self-monitoring of eating and activity has demonstrated efficacy for weight loss. Use of  
9 mobile technologies for self-monitoring eating and activity may address rural men's access 10  
11 disparities to preventive health resources and support weight loss. Our pilot trial will assess the

12 feasibility and acceptability of two mobile applications for weight loss in rural men to inform a 13  
14 future, full-scale trial.

15 **Methods and analysis:** A six-month randomized controlled trial with contextual evaluation will  
16 randomize 80 men using a 1:1 ratio to either a Mobile Technology Plus (MT+) intervention or a  
17 basic Mobile Technology (MT) intervention in rural, midlife men (ages 40-69 years). The MT+  
18 intervention consists of a smart phone self-monitoring application enhanced with discussion 18  
19 group (Lose-It premium), short message service (SMS) text-based support, and Wi-Fi scale.

The 19

20 MT group will receive only a self-monitoring application (Lose-It basic). Feasibility and  
21 acceptability will be evaluated using number of men recruited and retained, and evaluative focus  
22 group feedback. We seek to determine point estimates and variability of outcome measures of 23  
24 weight loss (kg and % body weight) and improved dietary and physical activity behaviors 24  
25 (BRFSS physical activity and fruit and vegetable consumption surveys, data from Lose-It! 25  
26 application [kcal/day, steps/day]). Community capacity will be assessed using standard best 26

27 practice methods. Descriptive content analysis will evaluate intervention acceptability and 28  
contextual sensitivity.

29 **Ethics and dissemination:** This protocol was approved by the University of Nebraska Medical 30  
Center Institutional Review Board (IRB# 594-17-EP). Dissemination of findings will occur 31 through  
ClinicalTrials.gov and publish pilot data to inform the design of a larger clinical trial.

32 **Registration details:**

33 ClinicalTrials.gov ID: NCT03329079; Pre-results

34

35 Protocol version 10, study completion date 8-31-2020

36 Roles and Responsibilities Funder: NIH/NINR Health Disparities Section 1R15NR017522-01

37

38 **KEYWORDS** rural population,  
mobile health technologies, men,  
weight loss, health disparities,  
39 self-monitoring, eating, activity

40

41 **STRENGTHS AND LIMITATIONS**

42

43  The combination of community-engaged approaches with a pragmatic RCT design delivers a 44  
weight loss intervention that facilitates local buy-in and is sensitive to context.

45  Components of the real-world comparator are included in the expanded, more  
comprehensive

46 intervention.

47  Trial available only to men with means and proficiency to own and operate a smartphone.

48

49  This study expands previous research using mobile applications to include community tailoring 50  
of the recruitment and intervention approach specific for rural men to inform a large definitive

51 trial.

52

53 **ACKNOWLEDGEMENT:**

54

55

56

57

58

59

60

3

1

2

3 The authors would like to acknowledge the Rural Men's Health Study Community Advisory 4

5 Board and UNMC Northern Division student nurses for contributions to recruitment outreach 6

and contextual tailoring of the intervention.

7

## INTRODUCTION

### Background and rationale

Over 55 million American men are overweight or obese.<sup>1</sup> Rates among midlife and older

men residing in the midwestern United States (U.S.) have tripled in the past 20 years, with 75.3%

<sup>2</sup> Rural men report of all adults in the United States age 40-59 years are overweight or obese.

overall poorer health than urban men.<sup>3</sup> Their obesity status predisposes high risk for metabolic syndrome and cardiovascular disease.<sup>4-5 3</sup>

Historically, rural men were less likely to be overweight and obese due to the high levels of physical activity involved in agricultural occupations.<sup>6</sup>

However, the mechanization of agriculture has shifted men's work roles to more

sedentary, technology-driven lifestyles, increasing the likelihood of developing

7 8

overweight/obesity.

Mobile health applications such as messaging and other interfaces available via mobile

phone have demonstrated improvement in health behavior change for weight loss among adults<sup>9-</sup>

<sup>11</sup>, and in some hard-to-reach minority populations.<sup>12</sup> The benefit that mobile technologies may

hold for engaging hard-to-reach rural men for weight loss is unknown. In addition,

there has been a limited study of men's health promotion through weight loss<sup>13</sup>, particularly rural men.

Men, when compared to women, are less likely to use weight control practices<sup>14</sup>, attempt

<sup>15-17</sup>. Poor access to weight loss resources is

weight loss, or participate in weight loss programs<sup>18</sup> Rural men also tend to exhibit dominant masculine norms<sup>19</sup>, which view help-

one reason.

seeking behaviors and health promotion strategies as feminine and weak.<sup>5, 19</sup> Health promotion

activities oriented to rural men's work roles are preferred.<sup>20</sup> Therefore, a weight loss intervention

For peer review only

whose content is adapted to the local norms, is accessible through the privacy of a smartphone, and communicated in an acceptable tone is critical. The Rural Men's Health Study plans to address the current gaps in knowledge by delivering a contextually sensitive weight loss

intervention that is feasible to the rural environment and acceptable to participants.

### Aims

We aim to 1) determine the feasibility and acceptability of a mobile technology enhanced self-monitoring intervention (MT+) for achieving weight loss in routine care of overweight and obese men in rural communities, 2) determine the point estimates and variability of outcome measures at 3 and 6 months following MT+ and MT interventions for achieving weight loss and improved dietary and physical activity behaviors for sample size estimation for a larger trial, and 3) determine quantitative and qualitative indicators of community capacity (resource mobilization, partnership linkages) to support a relevant weight loss intervention for rural men.

## METHODS AND ANALYSIS

### Design overview

<sup>21</sup>, pragmatic randomized controlled trial (pRCT) with an allocation ratio of 1:1. We will randomize 80 men into two groups: intervention and comparison. This pRCT will observe men in real-life rural conditions using varied versions of a mobile

phone-based self-monitoring application: one that is free and available in the community setting

<sup>22</sup> Recommendations of good practice for design and analysis and an enhanced, premium version.

4

of a pilot study note that 30 participants per group is a sufficient to estimate values for future trials sample size calculations. <sup>23</sup>

<sup>24</sup> As weight loss studies in rural men are a gap in the current literature, it is important that we obtain reliable estimates of effect size with which to perform a power analysis for subsequent research. So 30 participants per group will be needed, for a total of 60. Some participants will likely not complete the study, so we will enroll 80 men to allow for

9

10 up to a 25% attrition rate. Participants will complete assessments at baseline, 3 and 6-months  
11 post-baseline.

### 12 **Public and patient involvement**

14 Community engagement was used to inform the development of this protocol involving  
15 health professions students from the disciplines of nursing, physical therapy, and public  
16 health. A

17 community advisory board (CAB) was also developed. The CAB members represent the  
18 rural sampling region (i.e. farmers, insurance and machinery dealers, extension staff,  
19 and community

20 health workers) and meet quarterly to inform the study approach, material content and imaging,  
21 targeted venues for social marketing, dissemination of recruitment materials, and the direct  
22 referral of eligible participants. The funding source for this pilot study requires student  
23 involvement in study activities. One goal of the supporting grant mechanism was to expose  
24 under-represented rural students to research. Therefore, we involved graduate and undergraduate  
25 student nurses from the study sampling region.<sup>25</sup> We are involving undergraduate level student  
26 nurses in planning, implementation, and evaluation of community outreach and recruitment  
27 strategies. Two graduate (Master's and PhD) level student nurses, who are part of the 28  
29 investigative team, will also be used to assist with implementation and evaluation of the  
30 intervention, as described below.

### 31 **Participants and interventions**

#### Participant eligibility

32 Inclusion criteria: 1) man age  
33 40-69 years, 2) reside (majority  
34 of the time) in Northeast

35 <sup>2</sup>) or higher and weight not  
36 Nebraska, United States  
(RUCA code 4-10), 3) BMI of  
37 28 (kg/m

38 greater than 396 pounds (a man  
39 with a BMI of 50 or higher will  
require clinician clearance), 4)  
smartphone owner with enabled  
messaging, 5) email account, 6)  
answer "no" to all questions on  
the PAR-Q17 health history  
assessment or are willing to get  
physician evaluation prior to  
enrolling, and 7) willing to  
share Lose-It! self-monitoring  
logs with the investigative  
team, and

attend three assessment visits at the health department. An upper weight limit of 396 pounds

reflects the upper measurement capacity for the Withings© Body+ Composition smart scale. Per the university Institutional Review Board (IRB) policy, a man with a BMI of 50 or higher will be required to have clinician clearance. We prioritized midlife men in our age selection (over younger men) based upon current national overweight/obesity trends and the breadth of current evidence supporting decreasing midlife risk factors (weight loss, physical activity) and increased healthy survival.<sup>26 27 28</sup> Exclusion criteria: 1) recently lost 5% or more body weight, 2) currently taking medications that cause or are influenced by weight loss, 3) used weight loss application in

the past to lose weight, 4) person from same household is enrolled in study, and 5) Type I diabetes or Type II diabetes with insulin dependence.

### Intervention group *Self-Monitoring*

5

Lose-It! is a self-monitoring application designed for the general public and includes both a basic (free) and premium (\$39.99/annually) version. MT+ will receive the Lose-It! premium application, Withings© Body+ Composition smart scale, daily SMS messages, technology support, and a private group discussion board within the application. In addition to the self-monitoring, the premium version permits enhanced customization of goal setting, application-automated self-monitoring reminders, and customized email reports of self-monitoring trends important in supporting motivation and confidence during periods of behavioral inaction. The smart scale will provide automated recording of weight synchronized to the application, permitting immediate feedback, virtual rewards (i.e. badges for achievements) and visual maps of weight trends. The

participant will be instructed in how to synchronize the scale with their smartphone at baseline. They will be instructed to weigh themselves daily at home on this scale which will automatically update to their application after each weighing.

### *Social Support*

MT+ participants will be enrolled in a private, closed-group discussion board created



22 and moderated by the research team. The discussion board will provide social support to  
23 MT+

23 participants while completing the trial to promote long-term success.<sup>14, 15</sup> The discussion  
24 board

24 will also provide opportunity for participants to share their self-monitoring experiences,  
25 thus providing a mechanism to influence their peer participants to be aware about the  
26 value of their

27 own self-monitoring. The groups will be incentivized by a male moderator who will  
28 administer

28 peer challenges weekly (see Appendix I) and will also respond to questions. Participants will

29 also be encouraged to post weekly about their own successful strategies and progress  
30 reports related to their self-monitoring for weight loss.

31 We tested discussion board topics with the CAB comprised of men and women from the  
32 region. In addition to this, acceptability feedback about discussion board topics was  
33 gathered

33 from rural, male subjects in our preliminary study.<sup>5</sup> It is noted that the men desired both a  
34<sup>5</sup>

35 combination of both gender-tailored and standardized private discussion board topics.

### 37 *Text messaging*

38 A message library (see Appendix II) will be developed by the team based upon  
39 messaging

39 content that has demonstrated usefulness for behavior change<sup>29-32</sup> and preferred by men.<sup>5</sup>  
31, 33, 34

40 Message content will include a variety of topics including reminders, eating and physical  
41 activity

41 behaviors to be enacted and avoided, self-monitoring portion control, strategies for  
42 overcoming

43 weight loss barriers, and healthy living challenges. Content will be adapted from healthy eating and physical  
44 activity promoting resources that include USDA Choose My Plate and Centers for

35

44 Disease Control: Physical Activity.<sup>36</sup> Physical activity includes targeted aerobic physical  
45 activity,

46 monitoring of body weight, behaviors needed to sustain weight loss, promoting success and  
47 rewarding oneself, preventing failure, and avoiding temptations.<sup>16</sup> CAB members will inform  
48 and

48 review the content of the messages for local relevance prior to dissemination to the participants.

49  
50 An online automatic service (Remind.com©) will be used to send the free messages to  
51 participants twice per day on Monday, Wednesday, and Friday at 8am and 11am, and once per  
52 day on Tuesday, Thursday, Saturday, and Sunday at 8am. The delivery time, frequency, and  
53 number of text messages was based on feedback from midlife, rural male participants in the

preliminary study.<sup>5</sup>

6

### *Troubleshooting support and re-engagement prompt*

MT+ participants will have access to a 24-hour technology troubleshooting support from the investigative team via phone or text. The participant's food, activity, and weight log will be accessed once weekly by the investigative team to monitor frequency of logging. If dietary intake, physical activity, or weight are not logged for greater than five days, the participant will receive a reminder text and phone call from the assigned graduate level student nurse on the investigative team.

### *Comparison group*

The MT group of men will receive the Lose-It! basic application. The basic application permits real-time self-monitoring of eating, physical activity, and weight – same as the premium version. The basic version is available for free and is widely accessible by any smartphone user.<sup>22</sup> MT participants will be asked at baseline to self-monitor their eating, physical activity, and weight daily. They will be instructed to weigh daily and log the result into the application.

They will not receive message prompts for self-monitoring, no self-monitoring trend reports, and no peer interaction via application-based customized social group. The MT participants will only receive reminders for their assessment visit appointment times.

### *Technology orientation*

During the baseline visit, the community health worker will train men in both groups to use an assigned application username and password. Hands-on orientation training will be provided about how to use various features of the Lose-It! application (eg. log food intake, measure basic step count, etc). Both groups will receive a paper printed version of an

Application User Manual designed and adapted for the study.

### *Focus Groups*

Two focus groups will be held with participants comprising the MT+ group at 6 months

34 post-baseline. A purposive sample of MT+ completers stratified according to their weight  
loss 35  
36 experience (successful or unsuccessful in achieving the 5% baseline body weight loss goal) will  
37 be sought to solicit their perceptions on the MT+ intervention acceptability and feasibility.<sup>37 38, 39</sup>  
38 A semi-structured interview guide will be used during facilitation of a 90-minute discussion led  
39 by two co-moderators. Moderator-debriefing and reflexive memos will also be summarized after  
40 each interview and audio files will be transcribed verbatim. Collectively, these items will create  
a  
41 decision trail which will serve as an audit demonstrating accountability.<sup>40</sup> For a detailed 42  
43 participant timeline, see Figure 1.

#### 44 45 **Recruitment and consent**

46 Participant recruitment will occur through CAB and student outreach, Facebook 47  
advertising, ClinicalTrials.gov, university webpage, press releases, business bulletin board 48  
postings in businesses, community fairs, clinician office outreach, and direct referral.

49 Recruitment of minority men, primarily with men who identify as non-white-Hispanic, will be 50  
51 sought through Spanish speaking community health workers who already have established local 52  
trust. The recruitment period will last for 18 months from June 2018-November 2019 for trial  
53 participants.

54 Enrollment screening calls will be conducted by a trained graduate student nurse. The 55  
physical activity readiness questionnaire (PAR-Q 17) will be used to determine if clinician  
56

57  
58  
59  
60

7

1  
2

3 clearance is required prior to the baseline visit. Thus, informed consent (see Appendix III) will 4  
5 be obtained prior to its completion during the screening call. Research electronic data capture  
6 (REDCap) will permit real-time participant consenting. Study data will be collected and  
7 managed using REDCap electronic data capture tools hosted at the university. REDCap is a  
8 secure, web-based application designed to support data capture for research studies. When 9  
determined eligible, the participant will be invited to participate in the process of informed 10  
consent via a REDCap weblink to the secure consenting page sent via text message or email.

11 After live verification of their reading of the consent and answering relevant questions, the 12  
13 participant will provide a wet-signature, immediately verifiable online by the graduate student  
14 nurse. The wet signature is a feature in REDCap which allows participants to sign consent forms  
15 online in real time, by signing their name with their finger or computer mouse on a document as  
16 if the participant is using a pen and paper.<sup>41</sup> This process does not require an additional  
17 confirmation procedure<sup>42</sup> and is customary in REDCap consenting and data collection.<sup>41</sup> The  
18 informed consent document specifies the posting of clinical trial information at 19

20 ClinicalTrials.gov. A printed copy of the signed consent will be mailed to each participant 21  
immediately following conclusion of the enrollment interview.

22

### 23 **Randomization**

24 Random allocation of group assignment will occur using an allocation schedule created  
25 by the project statistician using a random number generator and “turn randomization” to  
ensure

26 equal sample sizes. The outcome assessor will receive a REDCap code and designated 27  
28 application username and password, along with the participant’s group assignment so to assist 29  
participants with successful download and orientation to the application version.

30

### 31 **Outcomes, measurements, data management, and analysis**

#### 32 **Outcomes**

##### 33 *Feasibility and acceptability*

34 Feasibility and acceptability will be evaluated using number of men recruited and 35  
36 retained, CAB member feedback, application use, and evaluative focus group feedback from 37  
intervention participants.

38

##### 39 *Clinical outcomes*

40 Preliminary efficacy of 3- and 6-month weight loss (kg and % body weight using a 41  
standard clinic scale) and improved dietary and physical activity behaviors (survey and data  
from

42

43 Lose-It! Application (kcal/day, steps/day) will be examined. The Tanita Scale (TBF-215) will be used to  
measure height, weight, and BMI<sup>43</sup> at the baseline, 3, and 6 month assessment visits.

44

45 Weekly, the graduate student nurse will also log into each participant’s Lose-It! account and  
46 export participant-logged weights. Fruit and vegetable consumption will be measured using the  
47 Behavioral Risk Factor Surveillance System (BRFSS) Fruit and Vegetable Dietary Intake  
48 Module (6 items).<sup>44</sup> The BRFSS Physical Activity Questionnaire will also be used to measure 49  
self-reported physical activity of the participants.<sup>44</sup> To measure the sugar sweetened beverage

50

<sup>45</sup> will be used.

51

intake, the Brief  
Questionnaire to Assess  
Beverage Intake (BEVQ-  
15)

52

Participant’s “weekly  
summaries” will also be  
exported from the app  
which includes daily food  
log, physical activity,  
weights, and total daily  
step count.

53

54  
55  
56  
57  
58  
59  
60

*Community capacity*

8

1  
2  
3

Community capacity will be assessed using a community capacity evaluation survey that<sup>46</sup>

4  
5

has been tested and applied with other rural U.S. communities for obesity prevention.

6

Descriptive content analysis will evaluate intervention acceptability and contextual sensitivity.

7  
8  
9

Measures  
Figure 2 outlines the outcome measures. Measures at 3 month and 6 months will be compared to

10 baseline. Additionally, health history, demographics, blood pressure, pulse rate, Comfort with 11  
11 Technology survey, and health information technology usability evaluation scale (health  
12 ITUES) 12

13 will be collected for further analysis of participants profile and outcomes (Figure 2).

#### 14 *Height, weight, and BMI*

15 The Tanita TBF-215 Body Composition Analyzer will be used to measure the  
16 participant's height, weight, and BMI following their manual guidelines.<sup>43</sup> The  
17 participant will 18 be asked to remove shoes, socks, belt, and empty pockets. The  
18 participant will be asked to stand 19  
20 up straight so height can be accurately measured. After height is measured, the participant will  
21 be asked to step off the scale, the scale will be zeroed, and the participant will step back on the  
22 scale to measure weight. Once the height and weight is confirmed, a paper copy of the  
23 participants values will print out with the calculated BMI.

#### 24 *Food and beverage intake*

25 To establish a baseline of food and beverage intake, the Behavioral Risk Factor 27  
26 Surveillance Survey (BRFSS) Fruit and Dietary Intake Survey and the BEVQ-15 will be <sup>36, 45</sup>  
27 The consumption of these are  
28 administered to participants at timepoints in Figure 2.  
29 indicators of a healthy overall diet<sup>6 36</sup>, and given the resource-constrained nature of feasibility  
30 studies we wanted to reduce participant's burden for data collection. Fruit and vegetable intake is  
31 an indicator used nationally to monitor and establish benchmarks of a healthy overall diet.<sup>36</sup> The  
32 Behavioral Risk Factor Surveillance System (BRFSS), in most states, the only source of uniform  
33 nutritional data for adults.<sup>36</sup> Sugar-sweetened beverage consumption are a major source of 35  
34 calories has received increasing attention in recent years as playing a role in the obesity 37  
35 epidemic.<sup>45 47 48</sup> Additionally, a lack of fruit and vegetable intake and is more common among 38 men<sup>49</sup>  
36 and rural residents<sup>50</sup> which relates to our study population.

39 Additional information regarding fruits and vegetable and sugar- sweetened beverage  
40 intake will be exported from the application logs and analyzed. Each week, the graduate  
41 student  
42 nurse will log into the participants web version of the application to retrieve the “weekly  
43 summary” of meals/day logged and average calories/day/week and export the data to participants  
44 ID labeled file.

#### 45 *Physical activity*

46 The BRFSS physical activity questionnaire will be used to gather participants self-report  
47 of physical activity.<sup>44</sup> Additionally, like the food intake, each week the graduate student  
48 nurse 49 will retrieve from the application the “weekly summary” of physical activity  
49 and total daily step 50  
51 count.

53 *Blood pressure and pulse rate*

54 The ADC e-sphyg™ 2 9002 Automatic Sphygmomanometer will be used to measure 55  
56 blood pressure of the participants. This model was selected due to specifications +/- 3mmHg

57  
58  
59  
60

9

1  
2

3

accuracy of cuff pressure consistent with acceptable standards, current acceptability of an

4  
5

<sup>51</sup>, and prior successful prior use in a oscillometric blood pressure unit in field and clinical areas

6

large clinical trial.<sup>52</sup> In addition, we did a test-retest before using this unit and the determined 7 the auto feature was appropriate for field trials such as ours. Routine checks will be conducted

8  
9

for calibration will be conducted every 6 months as recommended by the manufacturer.

10  
11

The participant will be asked to wear loose clothing or a short sleeve shirt, to avoid caffeine, intensive exercise and smoking for at least 30 minutes before measurement.<sup>52</sup>

12  
13

The

participant will be instructed to not talk during the rest period or during measurement.

The man's 13 arm will be placed on a desk or table so that the middle of the arm is at the level of the heart. The

14  
15

outcome assessor will line up the cuff mark "artery" over the individual's brachial artery. For 5 15 minutes, the participant will quietly sit in a chair (feet on floor, back supported) and rest without 16

17

talking. After obtaining a blood pressure, the participant will be asked to raise his arm for 10

18

seconds and wait another 30 seconds. Then the blood pressure procedure will be repeated with

19

measurements spaced about one minute apart. The procedure will be repeated until two readings

20

are within 5mmHg and average the two values together. Two resting pulse rates will also be 21

obtained using the blood pressure cuff and these values will be averaged together and recorded.<sup>53</sup> 22

23  
24

*Health history and demographics*

25  
26

A brief health history survey will be administered at baseline. A generic demographics 26 form was also administered to participants at baseline.

27

*Technology experience*

Technology experience will be evaluated with the Comfort with Technology Survey<sup>54</sup> (baseline), and the Technology Feasibility and Acceptability survey which was adapted from the

health-ITUES<sup>55</sup>(3 and 6 months). The comfort with technology survey asks questions related to

<sup>54</sup> The modified health-ITUES evaluates comfort, frequency, and purpose of technology use.

technology usefulness.<sup>55</sup>

Forpeerreviewonly

**Data management**

The outcome assessor will receive a participant specific REDCap code to enter assessment information. To encourage participant retention, the graduate student nurse will contact MT+ group participants if they fail to log their eating, activity, or weight in the Lose-It! application for greater than five days. If the participant states he cannot log daily the graduate student nurse will document reasons and encourage participant to post as often as he can.

**Analysis**

Aim 1- MT+ intervention feasibility and acceptability

Aim 1 will be evaluated through: 1) participation rates including number of men recruited and randomized over a 6-month period; 2) participant retention rates; 3) feasibility, usability, satisfaction ratings; 4) application logs of MT+; and 5) evaluative focus group feedback.

Descriptive statistics will be calculated on all variables, including frequencies and percentages for recruitment/retention, demographic, and categorical variables. To determine feasibility of recruitment, a rate will be measured in the time it takes to enroll 80 participants. To determine feasibility of retention, we used a threshold retention of 70% which is similar to studies of weight loss in men.<sup>56</sup> Feasibility, usability, and satisfaction ratings will be measured from modified health-iTUES, which was originally validated by authors to measure technology

10

usability, but has further been validated to be used as a customizable technology survey.<sup>57</sup> Means and standard deviations will be calculated for all continuous variables and measures at each time



6 point. Feasibility and acceptability analyses for aim 1 are largely descriptive, as we will be 7  
8 assessing participation rates and percentages of eligible men and which recruitment  
9 methods 8 were the most effective.

9 Qualitative content analysis<sup>40</sup> will guide interpretation of the focus group findings. The  
10 interview transcript and reflective memos taken during each focus group will comprise  
11 one unit 11 of analysis for within/across case comparison. The topics outlined by the  
12 interview guide will be 12

13 extracted and organized and  
14 transcripts read for  
15 substantive coding. Data  
16 “facts” will be  
17 organized under a-priori  
18 coding categories. The  
19 categories are named a-priori  
20 because they are  
21 built into the interview guide  
22 questions. A data “fact” will  
be defined as those data  
elements that  
recurred in the interview  
without lack of consensus or  
were least participant to  
errors in  
inference.<sup>58</sup> All data  
provided in a response to  
each question will be coded  
together. Incomplete,  
competing, or alternative  
topics that present in the  
discussion but were not  
identified a priori will  
<sup>59</sup> A data matrix will be used  
be aggregated and examined  
to determine their fit with the  
purpose.  
to display the coded data to  
search for patterns across  
coding categories. The  
principal  
investigator and graduate  
student nurse will return to  
the data to explore patterns  
further,

23 supporting iterative analysis.  
24 Data categories will be re-  
contextualized into an  
account that  
25 makes sense for the entire  
study's data set. Meaning,  
the findings are integrated to  
provide new  
understanding or explanation  
to the interpretation of the  
intervention outcome data.<sup>59</sup>  
Peer26 debriefing and audit  
checking will occur weekly  
across the analysis to assure  
accuracy of the 27

28 findings.

### 30 Aim 2- Variability of outcome measures and sample size estimation

31 Descriptive statistics of participant profiles for outcomes by time point and stratified by  
32 intervention group will be reported. The proportion of participants meeting the clinically  
33 meaningful threshold of 5% weight loss over the course of the study will also be  
reported. A 34 maximum likelihood estimation method (i.e. mixed models) will be used  
in order to utilize all 35  
36 available data. Outcome variables that are not normally distributed will either be transformed or  
37 assessed with non-parametric methods. An independent group t-test will be used to assess overall  
38 weight loss at follow-up solely to estimate an effect size (Cohen's d for weight loss  
between  
39 groups) for sample size estimation for a future large trial.

### 41 Aim 3- Indicators of community capacity

42 Multiple indicators of community capacity will be used to evaluate support for the  
43 weight loss intervention applying best practice recommendations: 1) CAB- assessed  
44 community  
capacity change via survey report<sup>46</sup>, participation level of CAB members (i.e. number of  
45 attended  
meetings, activities, resources allocated, partnership linkages), member attrition with  
46 reasons,  
47 perceived benefits/skills gained, barriers and facilitators of retention, proposed  
strategies to 48 increase retention, 2) student support in the outreach and recruitment  
will be tracked via number  
49 of hours of participation and partnership linkages.

**52 Data monitoring, auditing, and harm**

53 Each participant will be given a unique study identifier, all protected health information  
54 will be masked, and REDCap data exports will be limited to the principal investigator  
and the  
55 project statistician for generating reports and the conduct of statistical data analysis.  
56 Safety

57  
58  
59  
60

11

1

2

3 monitoring will be conducted monthly by the principal investigator, study statistician, and 4  
5 independent data safety monitor. Per university policy, all serious adverse events (AE) and 6  
unintended effects of the intervention will be reported to the university IRB and the independent 7 data  
safety monitor (IDSM) within two days after the principal investigator is notified of the AE.

8 The technology safety report will include troubleshooting requests from participants, re9 engagement  
attempts for participants who were not logging, and any technology related protocol 10 violations. The  
enrollment safety report includes new enrollment counts, subject withdrawals,  
11 protocol violations, AE, and preliminary outcomes.

12

13

**14 ETHICS AND DISSEMINATION**

15 This protocol, including consent forms, has been approved by the University of Nebraska  
16 Medical Center IRB (UNMC IRB# 594-17-EP). All protocol amendments will be  
communicated  
17 immediately to the IRB, DSMP, ClinicalTrials.gov, CAB, participants, and funder. All 18  
participants will be informed of their right to confidentiality right to leave the trial at  
any point 19

20 without loss of those benefits to which they were entitled. All data will be retained in HIPPA 21  
compliant REDCap database. REDCap at UNMC is supported by Research IT Office funded by 22  
Vice Chancellor for Research (VCR).

23

**24 Access to data**

25 The principal investigator, study statistician, and the designated IDSM will have access  
to  
26 the final trial dataset. All proposed study specific case report forms for data collection  
will be 27

28 coded by the participants unique study ID and maintained in REDCap. All data and other 29  
personal health information (PHI) will be removed from the study database upon completion of  
30 the study.  
31

### Ancillary and post-trial care

Post-trial care is not anticipated as this trial is classified as a low-risk intervention. Participants who express need for assistance will be informed of the UNMC support services and assisted in contacting them.

### Dissemination policy

Trial is registered at ClinicalTrials.gov., Identifier: NCT03329079. Deidentified summary results will be posted to ClinicalTrials.gov for public access and disseminated in scientific forums and to the local rural communities.

### AUTHORS' CONTRIBUTIONS

CE is PI directing all study components. KK is the statistician who co-leads data management. FB, AY, and KS develop and manage the mobile technologies. PH provides protocol oversight, assessment fidelity planning and training, JM conducts enrollment screening, recruitment, CAB and focus group moderation. CP advises ethics board and protocol adherence. Manuscript drafted by CE, KS and all authors revised-approved the final version. All authors contributed substantially to study design and protocol conduct.

**FUNDING STATEMENT:** Study supported by the National Institute of Nursing Research of the National Institute of Health under award number R15NR017522.

12

**COMPETING INTERESTS:** None declared.

### REFERENCES

1. Hales C, Carroll M, Fryar C, et al. Prevalence of obesity among adults and youth: United States, 2015-2016 Hyattsville, MD: National Center for Health Statistics; 2017 [updated 9 2019. Available from: <https://www.cdc.gov/nchs/products/databriefs/db288.htm> accessed 10 1 Aug 2019.
2. Ogden CL, Carroll MD, Kit BK, et al. Prevalence of childhood and adult obesity in the United States, 2011-2012. *Jama* 2014;311(8):806-14.
3. Meit M, Knudson A, Gilbert T, et al. The 2014 update of the rural-urban chartbook. Bethesda, MD: Rural Health Reform Policy Research Center 2014:153.

- 16 4. Shelton JB, Rajfer J. Androgen deficiency in aging and metabolically challenged men. *The*  
17 *Urologic clinics of North America* 2012;39(1):63-75. doi: 10.1016/j.ucl.2011.09.007 18  
19 [published Online First: 13 Oct 2011]
- 20 5. Eisenhauer CM, Hageman PA, Rowland S, et al. Acceptability of mhealth technology  
21 for  
22 self-monitoring eating and activity among rural men. *Public Health Nursing*  
23 2017;34(2):138-46. doi: <https://doi.org/10.1111/phn.12297> [published Online First: 18  
24 October 2016]
- 25 6. Lundeen E, Park S, Liping P, et al. Obesity prevalence among adults living in  
26 and nonmetropolitan countries-United States. *Morbidity and Mortality Weekly Report* 27(MMWR).  
27 Online: Centers for Disease Control and Prevention, 2016:653-58.
- 28 7. Guo Z, Jiang Y, Huffman SK. Agricultural mechanization and BMI for rural workers:  
29 A field  
30 experiment in China. *Economics Working Papers* 2018
- 31 8. Pickett W, King N, Lawson J, et al. Farmers, mechanized work, and links to obesity.  
32 *Preventive Medicine* 2015;70:59-63.
- 33 9. Han M, Lee E. Effectiveness of Mobile Health Application Use to Improve Health  
34 Behavior 33  
35 Changes: A Systematic Review of Randomized Controlled Trials. *Healthcare*  
36 *Informatics*  
37 *Research* 2018;24:207. doi: 10.4258/hir.2018.24.3.207
- 38 10. Beleigoli A, Andrade A, Cançado A, et al. The impact of web-based digital health  
39 interventions on weight loss and lifestyle habits changes in overweight and obese adults:  
40 a systematic review and meta-analysis (Preprint). *Journal of Medical Internet Research*  
41 2017;21 doi: 10.2196/jmir.9609
- 42 11. Fortuin J, Salie F, Abdullahi LH, et al. The impact of mhealth interventions on health  
43 systems: A systematic review protocol. *Systematic Reviews* 2016;5(1):200. doi:  
44 10.1186/s13643-016-0387-1
- 45 12. Anderson-Lewis C, Darville G, Mercado R, et al. mHealth technology use and  
46 implications  
47 in historically underserved and minority populations in the United States: Systematic  
48 literature review. *JMIR mHealth and uHealth* 2018;6 doi: 10.2196/mhealth.8383 47 13.  
49 Robertson C, Avenell A, Stewart F, et al. Clinical effectiveness of weight loss and weight  
50 maintenance interventions for men: A systematic review of men-only randomized  
51 controlled trials (the ROMEO project). *American Journal of Men's Health*  
52 2017;11(4):1096-123. doi: 10.1177/1557988315587550
- 53 14. Neumark-Sztainer D, Shenvood NE, French SA, et al. Weight control behaviors  
54 among adult 53 men and women: cause for concern? *Obesity Research* 1999;7(2):179-  
55 88. doi:  
56 10.1002/j.1550-8528.1999.tb00700.x

15. Lemon SC, Rosal MC, Zapka J, et al. Contributions of weight perceptions to weight loss 4 attempts: Differences by body mass index and gender. *Body Image* 2009;6(2):90-96. doi: 10.1016/j.bodyim.2008.11.004
16. French SA, Jeffery RW, Wing RR. Sex differences among participants in a weight-control 8 program. *Addictive Behaviors* 1994;19(2):147-58. doi: 10.1016/0306-4603(94)90039-6 9
17. Lovejoy JC, Sainsbury A, Stock Conference Working Group. Sex differences in obesity and 10 the regulation of energy homeostasis. *Obesity Reviews* 2009;10(2):154-67. doi: 10.1111/j.1467-789X.2008.00529.x [published Online First: 28 October 2008] 12
18. Klitzman P, Armstrong B, Janicke DM. Distance as a predictor of treatment attendance in a family based pediatric weight management program in rural areas. *The Journal of Rural 15 Health* 2015 15 June 2014; 31(1).  
<https://onlinelibrary.wiley.com/doi/full/10.1111/jrh.12078>.
19. Hiebert B, Leipert B, Regan S, et al. Rural men's health, health information seeking, and 18 gender identities: A conceptual theoretical review of the literature. *American Journal of 19 Men's Health* 2018;12(4) doi: 10.1177/1557988316649177 [published Online First: 11 May 2016]
20. Graham LJ, Connelly DM. "Any movement at all is exercise": A focused ethnography of 23 rural community-dwelling older adults' perceptions and experiences of exercise as self-24 care. *Physiotherapy Canada* 2013;65(4):333-41. doi: 10.3138/ptc.2012-31.
21. Whitehead AL, Sully BG, Campbell MJ. Pilot and feasibility studies: is there a difference from each other and from a randomised controlled trial? *Contemporary clinical trials 27* 2014;38(1):130-33.
22. Zuidegeest MGP, Goetz I, Groenwold RHH, et al. Pragmatic trials and real world evidence: Paper 1. Introduction. *Journal of Clinical Epidemiology* 2017;88:7-13. doi: 31 <https://doi.org/10.1016/j.jclinepi.2016.12.023> [published Online First: 14 May 2017] 32
23. Lancaster GA, Dodd S, Williamson PR. Design and analysis of pilot studies: 33 Recommendations for good practice. *Journal of Evaluation in Clinical Practice* 2004;10(2):307-12.
24. Browne RH. On the use of a pilot sample for sample size determination. *Statistics In Medicine* 1995;14(17):1933-40.

- 38 25. National Institutes of Health. Academic research enhancement award (parent R15)  
PA-16-
- 39 200. In: Health NIO, ed. Department of health and human services part 1 overview  
40 information. Online, 2017.
- 41 26. Robsahm TE, Heir T, Sandvik L, et al. Changes in midlife fitness, body mass index,  
42 and  
43 smoking influence cancer incidence and mortality: A prospective cohort study in men.  
44 *Cancer medicine* 2019
- 45 27. Strandberg T, Sirola J, Pitkälä K, et al. Association of midlife obesity and  
cardiovascular risk 46 with old age frailty: A 26-year follow-up of initially healthy men.  
47 *International journal of*  
*obesity* 2012;36(9):1153.
- 48 28. Holme I, Tonstad S. Survival in elderly men in relation to midlife and current BMI.  
*Age and*  
49 *ageing* 2015;44(3):434-39.
- 50
- 51 29. Shapiro JR, Koro T, Doran N, et al. Text4Diet: A randomized controlled study using text 52  
messaging for weight loss behaviors. *Preventive Medicine* 2012;55(5):412-17. doi:  
53 10.1016/j.ypmed.2012.08.011 [published Online First: 27 August 2012]
- 54
- 55
- 56
- 57
- 58
- 59
- 60
- 14
- 1
- 2
- 3 30. Shaw RJ, Bosworth HB, Hess JC, et al. Development of a theoretically driven mhealth text 4  
5 messaging application for sustaining recent weight loss. *JMIR mHealth and uHealth*  
6 2013;1(1):e5. doi: 10.2196/mhealth.2343
- 7 31. Patrick K, Raab F, Adams M, et al. A text message-based intervention for weight  
loss:  
8 Randomized controlled trial. *Journal of medical Internet research* 2009;11(1):e1. doi: 9  
10.2196/jmir.1100 [published Online First: 13 January 2009]
- 10 32. Gerber BS, Stolley MR, Thompson AL, et al. Mobile phone text messaging to promote 11  
healthy behaviors and weight loss maintenance: A feasibility study. *Health Informatics* 12  
13 *Journal* 2009;15(1):17-25. doi: 10.1177/1460458208099865
- 14 33. Joo N-S, Kim B-T. Mobile phone short message service messaging for behaviour  
15 modification in a community-based weight control programme in Korea. *Journal of* 16  
*Telemedicine and Telecare* 2007;13(8):416-20. doi: 10.1258/135763307783064331
- 17 34. Lee D, Moon J, Kim YJ, et al. Antecedents and consequences of mobile phone usability: 18  
Linking simplicity and interactivity to satisfaction, trust, and brand loyalty. *Information* 19

20 & *Management* 2015;52(3):295-304. doi: <https://doi.org/10.1016/j.im.2014.12.001>

21 35. United States Department of Agriculture. Dietary guidelines for Americans online:  
22 USDA; 2018 [Available from: [https://www.choosemyplate.gov/dietary-](https://www.choosemyplate.gov/dietary-guidelines)  
23 [guidelines](https://www.choosemyplate.gov/dietary-guidelines). accessed Web

24 Page.

25 36. Centers for Disease Control and Prevention. Surveillance of fruit and vegetable intake  
26 using 25 the behavioral risk factor surveillance system. 2015.

27 [https://www.cdc.gov/brfss/pdf/fruits\\_vegetables.pdf](https://www.cdc.gov/brfss/pdf/fruits_vegetables.pdf).

28 37. Hydén L-C, Bülow PH. Who's talking: Drawing conclusions from focus groups—some  
29 methodological considerations. *IntJ Social Research Methodology* 2003;6(4):305-21. doi:

30 <https://doi.org/10.1080/13645570210124865> [published Online First: 03 June 2010]

31 38. Rodgers BL, Cowles KV. The qualitative research audit trail: A complex  
32 collection of 32 documentation. *Research in Nursing & Health* 1993;16(3):219-26.  
33 doi:

34 <https://doi.org/10.1002/nur.477016030>

35 39. Mannell J, Davis K. Evaluating complex health interventions with randomized  
36 controlled

37 trials: How do we improve the use of qualitative methods? *Qualitative Health Research*  
38 2019;29(5):623-31. doi: <https://doi.org/10.1177/1049732319831032>

39 40. Hsieh H-F, Shannon SE. Three approaches to qualitative content analysis. *Qualitative*  
40 *Health*

41 *Research* 2005;15(9):1277-88. doi: 10.1177/1049732305276687

42 41. Haussen DC, Doppelheuer S, Schindler K, et al. Utilization of a smartphone platform  
43 for

44 electronic informed consent in acute stroke trials. *Stroke* 2017;48(11):3156-60. doi:

45 10.1161/STROKEAHA.117.018380

46 42. Civelek ME, Uca N, Çemberci M. eUCP and electronic commerce investments: E-  
47 signature

48 and paperless foreign trade. *Eurasian Academy of Sciences, Eurasian Business &*  
49 *Economics Journal* 2015;3

50 43. Tsui EYL, Gao, X.J., & Zinman, B. Bioelectrical Impedance Analysis (BIA) using  
51 bipolar  
52 foot electrodes in the assessment of body composition in Type 2  
53 Diabetes Mellitus.

54 *Diabetic Medicine* 1998(15):125-28. .

55 44. Brownson RC, Jones DA, Pratt M, et al. Measuring physical activity with the  
56 behavioral risk

57 factor surveillance system. *Medicine and Science in Sports and Exercise* 53  
58 2000;32(11):1913-18. doi: 10.1097/00005768-200011000-00015

59 45. Hedrick VE, Savla J, Comber DL, et al. Development of a brief questionnaire to  
60 assess



56 habitual beverage intake (BEVQ-15): Sugar-sweetened beverages and total beverage

15

57  
58  
59  
60  
1  
2  
3 energy intake. *Journal of the Academy of Nutrition and Dietetics* 2012;112(6):840-49.

4  
5 doi: 10.1016/j.jand.2012.01.023

6 46. Zoellner J, Hill JL, Brock D, et al. One-year mixed-methods case study of a  
community–

7 academic advisory board addressing childhood obesity. *Health promotion practice*  
8 2017;18(6):833-53.

9 47. Lundeen EA, Park S, Pan L, et al. Daily intake of sugar-sweetened beverages among  
US 10 adults in 9 states, by state and sociodemographic and behavioral characteristics,  
2016.

11 *Prev Chronic Disease* 2018;15:E154-E54. doi:

12  
13 <http://dx.doi.org/10.5888/pcd15.180335externalicon>

14 48. Malik VS, Schulze MB, Hu FB. Intake of sugar-sweetened beverages and weight  
gain: A 15 systematic review–. *The American journal of clinical nutrition*  
2006;84(2):274-88.

16 49. Singh GM, Micha R, Khatibzadeh S, et al. Global, regional, and national consumption of 17  
sugar-sweetened beverages, fruit juices, and milk: A systematic assessment of beverage

18 intake in 187 countries. *PLoS one* 2015;10(8):e0124845. doi:

19  
20 doi:10.1371/journal.pone.0124845

21 50. Sharkey JR, Johnson CM, Dean WR. Less-healthy eating behaviors have a  
greater 22 association with a high level of sugar-sweetened beverage  
consumption among rural 23 adults than among urban adults. *Food & Nutrition*  
24 *Research* 2011;55(1):5819. doi:

25 doi:10.3402/fnr.v55i0.5819

26 51. Pickering TG, Hall JE, Appel LJ, et al. Recommendations for blood pressure  
measurement in

27 humans and experimental animals. *Hypertension* 2005;45(1):142-61. doi:

28 doi:10.1161/01.HYP.0000150859.47929.8e

29 52. Hageman PA, Pullen CH, Hertzog M, et al. Web-based interventions alone or  
supplemented

30 with peer-led support or professional email counseling for weight loss and weight  
31 maintenance in women from rural communities: Results of a clinical trial. *Journal of*  
32 *obesity* 2017;2017

- 33 53. Perloff D, Grim C, Flack J, et al. Human blood pressure determination by  
34 sphygmomanometry. *Circulation* 1993;88(5 Pt 1):2460-70. doi: 10.1161/01.cir.88.5.2460  
35
- 36 54. Eisenhauer CM, Pullen EdD CH, Nelson T, et al. Partnering with rural farm women  
for  
37 participatory action and ethnography. *Online Journal of Rural Nursing and Health Care*  
38 2016;16(1):195-216. doi: <https://doi.org/10.14574/ojrnhc.v16i1.397> [published Online  
39 First: March 24, 2016]
- 40 55. Yen P-Y, Wantland D, Bakken S. Development of a customizable health it usability  
41 evaluation scale. *AMIA Annual Symposium proceedings AMIA Symposium*  
42 2010;2010:917-21.
- 43
- 44 56. Morgan PJ, Scott HA, Young MD, et al. Associations between program outcomes  
and  
45 adherence to social cognitive theory tasks: Process evaluation of the SHED-IT 46  
community weight loss trial for men. *International Journal of Behavioral Nutrition and*  
47 *Physical Activity* 2014;11(1):89.
- 48 57. Yen P-Y, Sousa KH, Bakken S. Examining construct and predictive validity of the health-it 49  
usability evaluation scale: Confirmatory factor analysis and structural equation modeling 50  
51 results. *Journal of the American Medical Informatics Association* 2014;21(e2):e241-e48. 52 58.
- Saldaña J. The coding manual for qualitative researchers. 3 ed. Thousand Oaks, CA: Sage  
53 2015.
- 54 59. Liberato SC, Brimblecombe J, Ritchie J, et al. Measuring capacity building in  
communities:  
55 A review of the literature. *BMC public health* 2011;11(1):850.  
56  
57  
58  
59  
60

1

16

2 Figure 1: Participant Timeline

3 Figure 2: Measurements

For peer review only

4

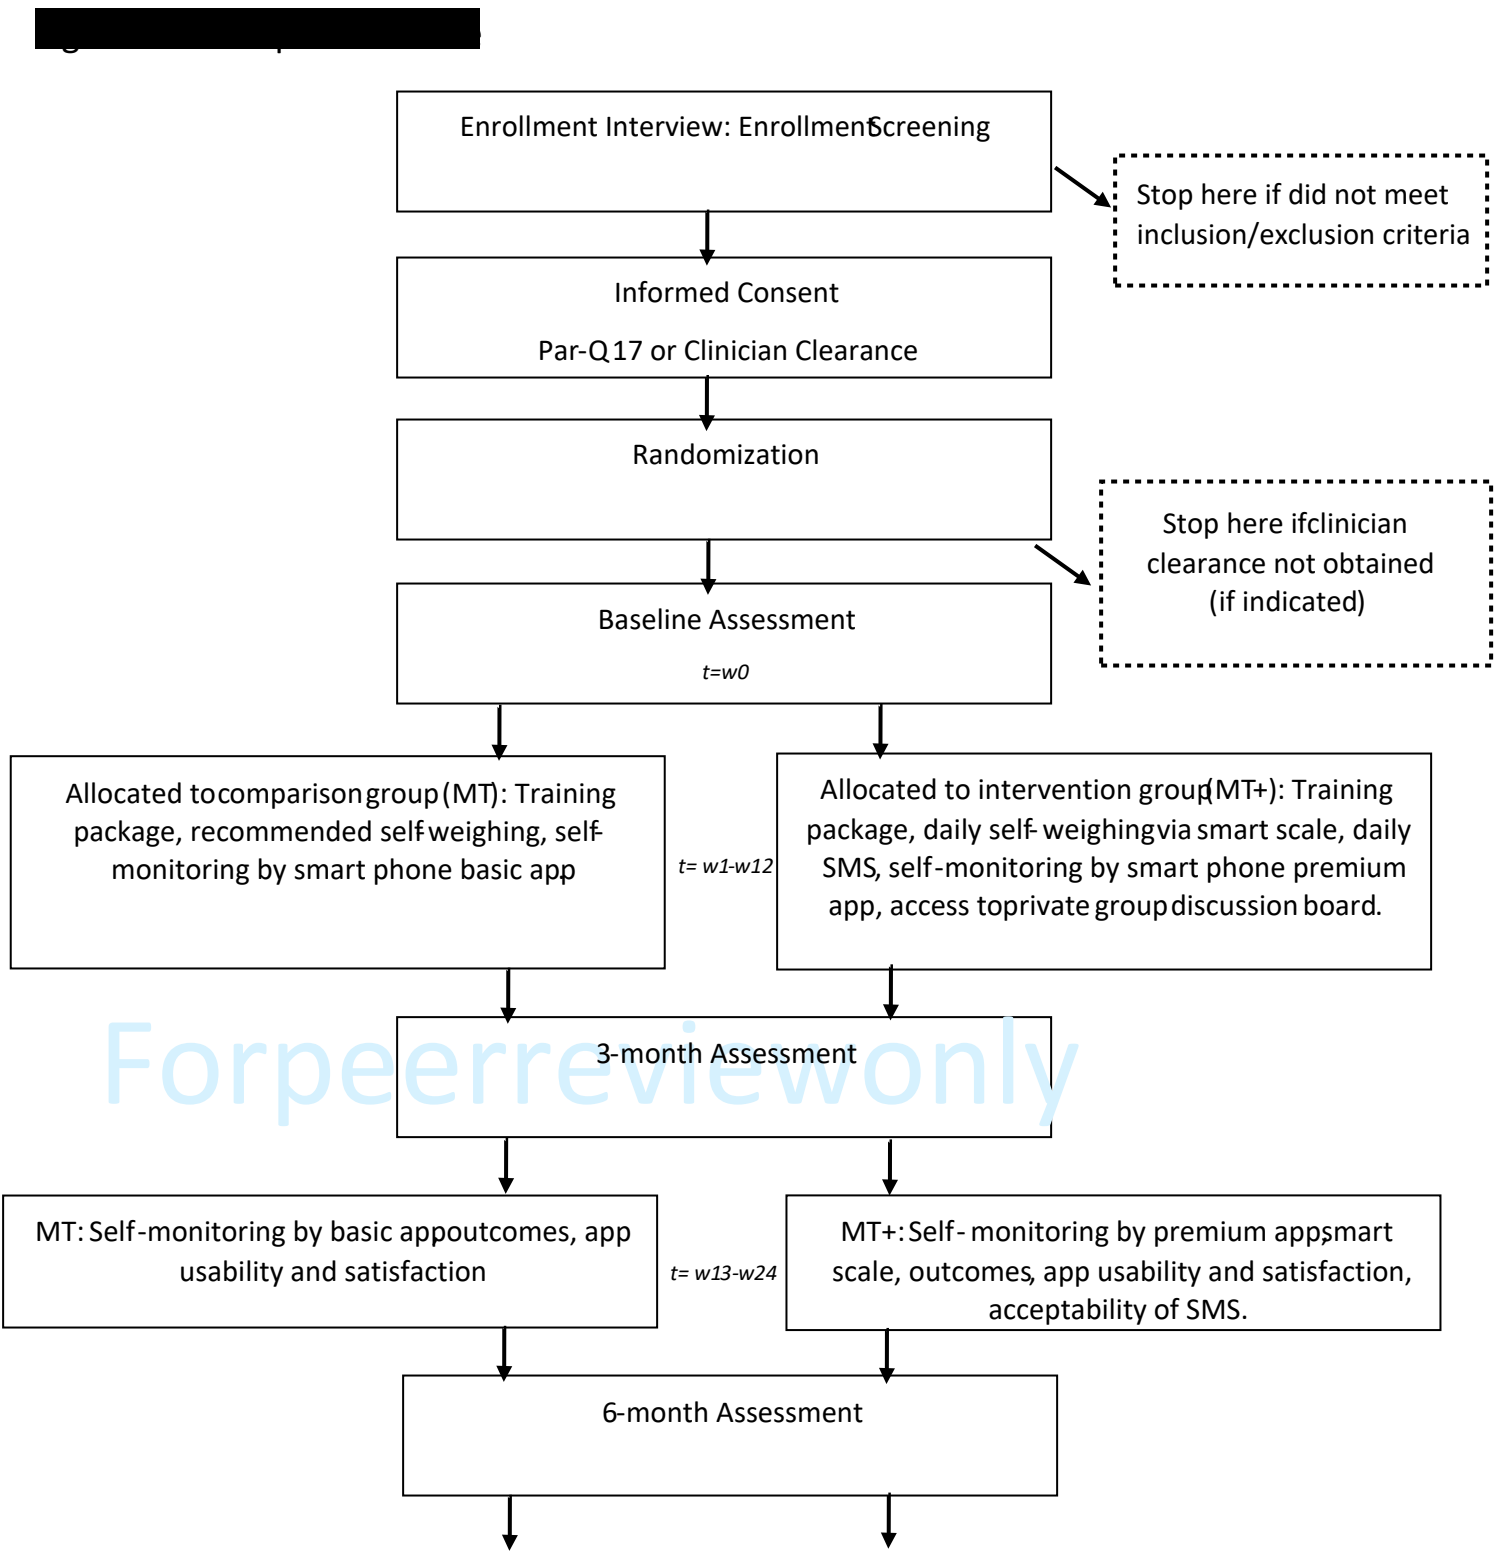

For peer review only

1  
2  
3  
4  
5  
6  
7  
8  
9

10  
11  
12  
13  
14  
15  
16  
17  
18  
19  
20  
21  
22  
23  
24  
25  
26  
27  
28  
29  
30  
31  
32  
33  
34  
35  
36  
37  
38  
39  
40  
41  
42  
43  
44  
45  
46  
47  
48  
49  
50  
51  
52  
53  
54  
55  
56  
57

MT: Outcomes

t= w25+

MT+: Outcomes, Focus Groups

58  
59  
60

## 1 Figure 2: Measurements

| <b>Measure Description (Data Collection Time Points)</b>             |                                                                                                                                            |                                                      |
|----------------------------------------------------------------------|--------------------------------------------------------------------------------------------------------------------------------------------|------------------------------------------------------|
| <b>Primary Outcomes: Body Mass Index and Weight</b>                  |                                                                                                                                            |                                                      |
| Body mass index                                                      | Tanita Scale (TBF-215)                                                                                                                     | Baseline, 3 months, and 6 months                     |
| Weight                                                               | In-person measurement of weight by the Tanita Scale (TBF-215)                                                                              | Baseline, 3 months, and 6 months                     |
|                                                                      | Withings© Body+ Body Composition Smart Scale (MT+)                                                                                         | Daily measure (Recommended), Weekly average computed |
|                                                                      | Self-reported weight (MT)                                                                                                                  | Daily (Recommended), Weekly average computed         |
| <b>Secondary Outcomes: Diet and Physical Activity</b>                |                                                                                                                                            |                                                      |
| Fruit and Vegetable Servings                                         | BRFSS-Fruit and Vegetable Dietary Intake module <sup>27</sup>                                                                              | Baseline, 3 months, and 6 months                     |
| Sugar-Sweetened/ Total Beverage Energy Intake                        | Brief Questionnaire to Assess Beverage Intake (BEVQ-15) <sup>35</sup>                                                                      | Baseline, 3 months, and 6 months                     |
| Physical Activity                                                    | BRFSS- Physical activity module <sup>34</sup>                                                                                              | Baseline, 3 months, and 6 months                     |
| Report of daily log of dietary intake, physical activity, and weight | Weekly summary downloaded from app which includes participants self-report of dietary intake, physical activity, weight, and steps per day | Weekly reports exported during study                 |

2

For peer review only

3  
4

1

5 **Appendices Appendix I: Private Group Discussion Board- Moderator Weekly Posts**

6

**Week 1: Water**

Thousands have lived without love, not one without water (Auden). A recent study found that drinking 16 oz of water before meals increases fat loss in overweight individuals on a diet. Drink one gallon of water per day. This can come from food or beverage. Fruits and vegetables contain more water than other foods. Carrying a refillable water bottle with you during the day can help you increase your water consumption.

For more information: <https://www.mensjournal.com/food-drink/5-reasons-never-neglectwater/>

Challenge: Increase your daily water consumption to 1 gallon per day.



**Week 2: Increasing Physical Activity**

Physical activity reduces the risks of heart disease and diabetes better than weight loss alone. The American Heart Association recommends 30 minutes of moderate activity 5 days per

Moderate activity includes walking, hiking, gardening, or golfing. Moderate activity makes you sweat but will not take your breath away.

A great way to start is by walking. Start by walking 10-15 minutes at a time to total 30 minutes

For more information: <https://healthyforgood.heart.org/move-more/articles/hate-exercise-5->

Challenge: exercise for an additional 30 minutes per week beyond what you are already doing.

week.

a day.

[steps-to-loving-exercise](#)

**Week 3: Avoiding Empty Calories**

Empty calories are calories that provide your body with no nutrition. They are found in packaged foods like cakes, cookies, candy, soda, alcohol, fast food etc.

They are high calorie, low nutrition, and contain high amounts of sugar and solid fat.

As a general rule, if it comes in a package it probably contains empty calories.

Try eating more whole food calories in fresh fruits and vegetables, eggs, poultry, nuts, whole wheat bread, protein bars, or low-fat milk.

For more information: <http://www.menshealth.co.uk/healthy/11-ways-to-cut-hundreds-of-empty-calories-a-day>

Challenge: Limit your empty calorie intake to 200 calories per day.

**Week 4: Family/Friends Challenge**

Having family and friends involved in your diet and exercise program can contribute to your success. Let others know about your eating goals so healthy options can be available.

Instead of watching TV with others, try going on an evening walk together. Encouraging others to get involved with you will not only be beneficial for you, but them as well!

For more information: <https://www.parents.com/fun/sports/exercise/10-ways-to-exercise-as-a-family/>

Weekly challenge: Include your family in exercise 2 days this week.

**Week 5: Portion Sizes**

7

2

Serving size and portion size are not always the same. Serving size is the manufacturer's recommendation of the serving, portion size is how much is actually consumed. Your portion size should match the serving size.

Veggies: 1 cup of raw veggies or 2 cups of leafy greens. 1 cup is roughly size of a fist.

Fruit: one medium apple or orange, ½ cup of sliced fruit. ½ cup is one cupped hand.

Grains: 1 slice of bread. ½ cup of dry pasta or bread. ½ medium potato.

Protein: 3 oz of meat is the size of a deck of cards.

Fats: 1 oz of cheese is size of two dice. 1 tsp of butter is the size of one die.

It's important to accurately count your portion sizes to accurately log food for weight loss. If you are under counting your portion size, you will not account for calories you are consuming.

For more information: <https://healthyforgood.heart.org/eat-smart/articles/portion-size-versusserving-size>

Challenge: Examine your portion sizes during at least one meal each day this week and try to improve your portion sizes. Use the information above as a guideline.

Sodium contributes to the development of high blood pressure, which is the one of the major

The American Heart Association recommends a sodium intake of 2300mg a day with an ideal 2300mg of sodium is equivalent to one teaspoon of salt.

Most sodium consumed by Americans does not come from table salt but is in processed foods. The easiest way to avoid sodium is to avoid processed foods.

In the Lose-it! App, you can create a goal to limit your sodium intake to 2300mg daily. The app will automatically track sodium as you log food, so you can view your sodium

For more information: <https://www.menshealth.com/health/a19548436/blood-pressure-guide/>  
 Weekly challenge: Limit sodium intake to 2300mg daily.

### **Week 6: Avoiding Salt/Sodium**

risk factors for heart disease. limit of 1500mg a day. consumption each day.

### **Week 7: Moving Every Hour**

A study was conducted in 2017 which found that patterns of sitting are associated with higher illness.

Not only is exercise important, but so is moving every hour! It's easy to forget to move every hour, so try setting a timer on your phone or watch to get up and walk around. For more information:

<https://www.mensjournal.com/health-fitness/a-five-minute-walk-could-undo-an-hour-of-sitting-20141009/>

Challenge: Move every hour from 9-5. The goal is to have 9/9 hours active!

### **Week 8: Improve Sleep Quality**

A good night's sleep is an important component to weight loss programs.

The recommendation for sleep for adults is 7 hours per night.

Insufficient sleep is linked to the development of chronic disease like obesity, diabetes, depression, and cardiovascular disease.

Here are some tips for better sleep:

1. Make your bedroom a quiet and relaxing environment.

2. Turn off screens 30 minutes before bed.
3. Be consistent. Get your body on a “sleep schedule” so you go to bed and wake up at the same time.
4. Avoid large meals before bed.
5. Exercise! Exercise is proven to improve sleep quality.

For more information: <https://www.mensjournal.com/style/sleep-better-live-better/>

Challenge: Try to get 7 hours of sleep each night this week.

### **Week 9: Fit After 40**

As we get older our bodies change and our metabolism slows.

Staying fit after 40 is a little different than it was when you were in your 20s!

Lean tissue mass will start to decline and fat mass will increase.

Diet and exercise can help prevent this process.

Here are some tips for weight loss after 40:

1. Start with moderate activity like walking. If you are already walking several times a week, try incorporating strength training into your routine.
2. Cut back on red meat. Increase intake of lean protein and veggies.
3. Avoid alcohol. Alcohol contains empty calories and provides no nutritional value.
4. Reduce stress. Stress causes increase in cortisol levels which is associated with increased body fat.

Here is an article with additional tips for weight loss:

<https://www.mensjournal.com/healthfitness/7-weight-diet-loss-tips-men-over-40/>

Challenge: Try at least one of the four tips listed above this week.

**Week 10: Strength Training**

Strength training is an important piece to exercise.

The American Heart Association recommends strength training two days a week.

With a larger muscle mass, your metabolism increases and your body burns calories more

Strength not only increases muscle mass but increases bone mass as well.

For more information: <https://www.mensjournal.com/health-fitness/beginners-guide-weight-training/>

Challenge: Incorporate strength training into your exercise program two days this week.

efficiently.

**[weight-training/](#)****Week 11: Reducing Stress**

According to the American Heart Association, chronic stress can cause high blood pressure, is linked to heart disease, and can weaken your immune system.

During stressful times, it's important to continue to practice healthy lifestyle behaviors.

Some helpful tips to managing stress include:

1. Exercise.
2. Get adequate sleep.
3. Maintain a healthy diet.
4. Spend time with family or friends.

For more information: <https://www.mensjournal.com/health-fitness/20-science-backed-ways-reduce-stress/>

Challenge: Try at least one of the four tips listed above this week.

**Week 12: Making a Diet Your Lifestyle You made it!**

Congrats, this is the final week of the study.

1  
2  
3 One thing you can do to stay on track is continue healthy eating and physical activity.  
4

5 Continue to log your food to track your caloric intake.

6 Increase your physical activity to moderate or vigorous if tolerated.

7 There are various apps available to track food and activity which you can use after this study.

8 For more information: <https://www.mensjournal.com/health-fitness/how-to-add-18-years-to-your-life-w436796/>  
9

10 Challenge: Make a plan and stick to it! 11  
12  
13  
14  
15  
16  
17  
18  
19  
20  
21  
22  
23  
24  
25  
26  
27  
28  
29

30  
31 For peer review only  
32  
33  
34  
35  
36  
37  
38  
39  
40  
41  
42  
43  
44  
45  
46

47  
48  
49  
50  
51  
52  
53  
54  
55  
56  
57  
58  
59  
60

1

5

2 **Appendix II: List of Text Messages**

| <b>G=Goal Oriented/Self-Monitoring</b>                                                                                                                         |
|----------------------------------------------------------------------------------------------------------------------------------------------------------------|
| 1. Healthy isn't a goal. It's a way of living.                                                                                                                 |
| 2. Work hard enough to raise your heart rate and break a sweat.                                                                                                |
| 3. Today your goal is to exercise for 10 minutes, 3 times today.                                                                                               |
| 4. Eat plenty of fruits of all colors today.                                                                                                                   |
| 5. Did you eat the recommended amount of protein today? No beer is not protein.                                                                                |
| 6. Avoiding processed meats is best, try choosing fish or lean meat today.                                                                                     |
| 7. Don't overeat. Your goal today is to control your portion sizes at meals.                                                                                   |
| 8. How many servings of fruits or vegetables did you eat yesterday?                                                                                            |
| 9. How many glasses of water did you drink yesterday?                                                                                                          |
| 10. Make sure half of the grains you eat are whole grains. Whole grains can help give you a feeling of fullness. Choose whole-wheat breads, pasta and oatmeal. |
| 11. Take your time eating. Savor your food. Eat slowly. Enjoy the taste and textures of your food.                                                             |
| 12. Make half your grains whole grains.                                                                                                                        |
| 13. Try eating on a normal sized plate that is 8 inches round. It might look like the saucer to your coffee cup at first.                                      |
| 14. Short bouts of 10 minutes of moderate or vigorous activity count!                                                                                          |
| 15. Avoid heavy gravies or sauces as they add fat and calories to otherwise healthy choices. (And they stain your shirt).                                      |



**M = Motivational**

For peer review only

- |                                                                                                                         |
|-------------------------------------------------------------------------------------------------------------------------|
| 16. No matter how slow you go, you're lapping everybody on the couch.                                                   |
| 17. Good things come to those who sweat. Especially if you are moving when sweating.                                    |
| 18. 10,000 steps is roughly walking 5 miles. Then you can tell stories that you walked 5 miles for (fill in the blank). |
| 19. Make it a lifestyle, not a duty.                                                                                    |
| 20. Don't use the weekend as an excuse to give up on your goals.                                                        |
| 21. Sweat is fat crying.                                                                                                |
| 22. It's not easy, but it is worth it. Now repeat that every day.                                                       |
| 23. Be stronger than your excuses.                                                                                      |
| 24. Some activity is better than none.                                                                                  |
| 25. You don't have to eat less you just have to eat right.                                                              |
| 26. A one-hour workout is 4% of your day.                                                                               |
| 27. When you feel like quitting, ask yourself why you started.                                                          |
| 28. Thank you for reading this text. You can lose ½ a pound by pushing the off button 20,000 times.                     |
| 29. When tempted by junk food, turn your head to the left and then to the right. Repeat as necessary.                   |
| 30. Attitude is everything! New day! New Strength! New Thoughts!                                                        |
| 31. No matter how slow you go, you are still lapping everybody on the couch!                                            |
| 32. Will it be easy? NOPE! But it will be WORTH IT!!!                                                                   |

3

|                                                               |
|---------------------------------------------------------------|
| 33. Nothing is impossible, the word itself says I'm possible. |
|---------------------------------------------------------------|

6

|                                         |
|-----------------------------------------|
| 34. Strive for progress not perfection! |
|-----------------------------------------|

|                                                  |
|--------------------------------------------------|
| 35. Being healthy is not a race, it's a journey! |
|--------------------------------------------------|

|                       |
|-----------------------|
| 36. You've Got This!! |
|-----------------------|

|                                       |
|---------------------------------------|
| 37. You are stronger than you think!! |
|---------------------------------------|

|                                            |
|--------------------------------------------|
| 38. BLT's- Bites, licks, tastes count too. |
|--------------------------------------------|

|                                                                                                                                                                                                                                                                                                                                                                                                                               |
|-------------------------------------------------------------------------------------------------------------------------------------------------------------------------------------------------------------------------------------------------------------------------------------------------------------------------------------------------------------------------------------------------------------------------------|
| 39. You'll never change your life until you change something you do daily. The secret to success is found in your daily routine. This year—set a goal to change ONE thing about your day to be healthier. Keep the goal specific and measurable. Instead of saying you are going to exercise this year, tell yourself you are going to exercise for 30 min, 5 days this week. Repeat this each week until it becomes a habit. |
|-------------------------------------------------------------------------------------------------------------------------------------------------------------------------------------------------------------------------------------------------------------------------------------------------------------------------------------------------------------------------------------------------------------------------------|

|                                                                                                           |
|-----------------------------------------------------------------------------------------------------------|
| 40. Are you frustrated? Are you ready to quit? DON'T!! Remember why you started this in the first place!! |
|-----------------------------------------------------------------------------------------------------------|

|                                                                                          |
|------------------------------------------------------------------------------------------|
| 41. Every step you take toward your goal is a step closer to more time with your family! |
|------------------------------------------------------------------------------------------|

|                                                                                                         |
|---------------------------------------------------------------------------------------------------------|
| 42. Even if you lose ½ a pound a week you will still lose 26 pounds by this time next year. Keep going! |
|---------------------------------------------------------------------------------------------------------|

|                                                                                                                                                                                                               |
|---------------------------------------------------------------------------------------------------------------------------------------------------------------------------------------------------------------|
| 43. It takes 4 weeks for you to see your body changing, it takes 8 weeks for your friends and family, and it takes 12 weeks for the rest of the world to see the changes, but your heart sees it immediately. |
|---------------------------------------------------------------------------------------------------------------------------------------------------------------------------------------------------------------|

|                                                                   |
|-------------------------------------------------------------------|
| 44. Be stubborn about your goals and flexible about your methods. |
|-------------------------------------------------------------------|

|                                                                               |
|-------------------------------------------------------------------------------|
| 45. Exercise in the morning, before your brain figures out what you're doing. |
|-------------------------------------------------------------------------------|

|                                                       |
|-------------------------------------------------------|
| 46. You don't have to be extreme, just be consistent. |
|-------------------------------------------------------|

47. It's a slow process but quitting won't get you there.

For peer review only

**R = Reminder (for tracking, healthy eating, etc.)**

48. Tracking your food intake is a key to success - remember to track today.

49. They key to healthy eating? Avoid any food that has a TV commercial.

50. Your safety is priority! It may be tempting to compete with others and set an unrealistic and unhealthy goal for increasing your steps.

51. Drink more water today.

52. What is moderate activity: I can talk while I do them, but I can't sing.

53. Remember to eat a variety of whole grains.

54. Make half your plate fruits and vegetables.

55. Remember to eat breakfast.

56. Take a walk after lunch.

57. Make sure to get your steps in today.

58. 5 fruits and veggies a day!

59. Did you know....1 pound of fat is approximately the size of a large grapefruit?

60. Did you know 1 pound of fat is worth 3500 calories!

61. Have you logged today?

62. Guzzle Guzzle the water – 64 oz!

63. Don't forget to log those workouts!

|                                                                                                                                     |
|-------------------------------------------------------------------------------------------------------------------------------------|
| 64. Daily health checklist: Drink water, eat a fruit or veggie every meal, workout, stretch, LAUGH and SMILE, try to sleep 8 hours. |
|-------------------------------------------------------------------------------------------------------------------------------------|

4

7

|                                                                                                                   |
|-------------------------------------------------------------------------------------------------------------------|
| 65. Did you know weight loss is 30% workout and 70% diet?                                                         |
| 66. Indulge by the rule of 1 – 1 scoop of ice cream, 1 small piece of pie, 1 piece of chocolate.                  |
| 67. Exercise during commercials – get 10 lunges, 10 sit ups or 10 squats!                                         |
| 68. Park farther from the door and walk to get the mail, go to the store, or going to work.                       |
| 69. Take stairs when you can.                                                                                     |
| 70. Eat for energy, not for comfort!                                                                              |
| 71. Did you meet your fitness goals?                                                                              |
| 72. Have you logged your meals today?                                                                             |
| 73. Try redirecting your attention when those cravings hit, give it 15minutes before giving in! Drink some water! |
| 74. It's Friday! Don't lose track this weekend- stay focused!                                                     |
| 75. You don't have to eat less you just have to eat right.                                                        |
| 76. Weekends count! Don't dip out on your diet.                                                                   |
| 77. Try to get 250 steps every hour. Get up and take a walk.                                                      |
| 78. Ask for dressings, butter, and sour cream on the side.                                                        |
| 79. Buffet time? Hit up the salad bar.                                                                            |
| 80. At the buffet? Make one trip. You don't have to eat it all.                                                   |
| 81. A gas station hot dog has 400 calories. Pack a lunch today!                                                   |
| 82. Remember to walk instead of drive when you can!                                                               |
| 83. Switch your soda for water today. 1 can of soda has about 150 calories. 3 cans of soda is 450 calories!       |

84. Remember portion control— check the back of the bag for serving size!

For peer review only

85. Eat slowly and take small bites. It takes 20 minutes for your brain to register fullness.

86. Motivation is what gets you started habit is what keeps you going.

87. Consistency is key!

88. At the gas station? Grab a protein bar instead! Protein keeps you full for longer.

89. Too cold to exercise? Try jumping jacks in your living room.

90. Buzz the Buffet. Take a walk around the buffet first before filling your plate. Choose your favorite foods and skip over your least favorite.

91. Don't skip meals! Skipping meals will make you hungrier and cause you to overeat at your next meal.

92. Don't forget breakfast! Get your metabolism started today.

93. Food is fuel, not comfort.

94. Going cold turkey doesn't work. One healthy habit in, one bad habit out!

95. The best snacks are 200cal or less, filling yet satisfying. Snacking keeps up your metabolism throughout the day helping you burn calories and keep your energy levels up.

96. Remember, one serving of meat is the size of a deck of cards

97. Drink your first glass of water right when you wake up! Rehydrate and stimulate your digestive system.

98. Eating healthy is not a diet, it's a lifestyle.

99. Create healthy habits not restrictions.

5

|                                                                 |
|-----------------------------------------------------------------|
| 100. Exercise gives you more energy and helps you stay focused. |
|-----------------------------------------------------------------|

8

|                                                                                                              |
|--------------------------------------------------------------------------------------------------------------|
| 101. Even if you lose ½ pound a week. You will still lose 26 pounds by this time next year. Just keep going. |
|--------------------------------------------------------------------------------------------------------------|

|                                                                                                     |
|-----------------------------------------------------------------------------------------------------|
| 102. Tip: put fruits and vegetables at eye level in the fridge so they are the first thing you see. |
|-----------------------------------------------------------------------------------------------------|

|                                                                                                    |
|----------------------------------------------------------------------------------------------------|
| 103. Tip: have fresh fruit like bananas or apples on the table so they are easy to grab on the go. |
|----------------------------------------------------------------------------------------------------|

|                                                                            |
|----------------------------------------------------------------------------|
| <b>E = Educational (Tips, Physical Activity, Nutrition/Healthy Eating)</b> |
|----------------------------------------------------------------------------|

|                                                                                                                                  |
|----------------------------------------------------------------------------------------------------------------------------------|
| 104. Regular physical activity helps build and maintain healthy bones and muscles, so you can beat your friend at arm-wrestling. |
|----------------------------------------------------------------------------------------------------------------------------------|

|                                                                                  |
|----------------------------------------------------------------------------------|
| 105. Regular physical activity helps reduce the risk of developing colon cancer. |
|----------------------------------------------------------------------------------|

|                                |
|--------------------------------|
| 106. Exercise controls weight. |
|--------------------------------|

|                              |
|------------------------------|
| 107. Exercise improves mood. |
|------------------------------|

|                              |
|------------------------------|
| 108. Exercise boosts energy. |
|------------------------------|

|                                      |
|--------------------------------------|
| 109. Exercise promotes better sleep. |
|--------------------------------------|

|                                                                           |
|---------------------------------------------------------------------------|
| 110. You may want to work with your doctor to set up an activity program. |
|---------------------------------------------------------------------------|

|                                                              |
|--------------------------------------------------------------|
| 111. Estimating Portion Sizes: 1 egg is 2 ounces or 1/4 cup. |
|--------------------------------------------------------------|

|                                                                        |
|------------------------------------------------------------------------|
| 112. Adults should do strengthening activities at least 2 days a week. |
|------------------------------------------------------------------------|

|                                                                       |
|-----------------------------------------------------------------------|
| 113. If you haven't been active in a while, start slowly and buildup. |
|-----------------------------------------------------------------------|

|                                                                                  |
|----------------------------------------------------------------------------------|
| 114. Estimating Portion Sizes: A golf ball is equal to 2 tablespoons or 1 ounce. |
|----------------------------------------------------------------------------------|

|                                                             |
|-------------------------------------------------------------|
| 115. Estimating Portion Sizes: a deck of cards is 3 ounces. |
|-------------------------------------------------------------|

116. Being active has benefits. It helps you feel better about yourself. It helps you sleep better. It helps you move around more easily.

For peer review only

117. Adults need about 150 minutes of moderate activity a week.

118. Vigorous-intensity aerobic activity means you're breathing hard and fast, and your heart rate has gone up quite a bit. If you're working at this level, you won't be able to say more than a few words without pausing for a breath.

119. Doing 1 minute of vigorous-intensity exercise is equal to about 2 minutes of moderate activity.

120. Satisfy your "sweet tooth". Eat a natural dessert such as fruit.

121. Sodas or other beverages can add about 400 calories a day to men's diet, water is a better choice.

122. Estimating Portion Sizes: Baseball is equal to 1 cup.

123. Medical authorities agree that 10,000 steps is a healthy number to strive for a day.

124. Calories are tiny creatures that make your clothes tight at night – did you know Coors Light has 102 calories, a Bud Light has 110 calories and a Michelob Ultra has 95 calories per bottle.

125. A six pack of Bud Light has 660 calories. You would have to walk 4.5 miles to burn off the calories.

126. Just 100 extra calories a day means 10 extra pounds a year.

127. If you don't recognize the ingredient, your body won't either.

128. Don't be fooled by "low fat" or "sugar free." This is code for "processed." Stick to whole foods!

129. Avoid eating foods with ingredients you can't pronounce.

6

9

For peer review only

7



9 **Appendix III: Consent Form**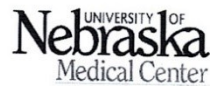

IRB PROTOCOL # 594-17-EP

Page 1 of 9

**ADULT CONSENT - CLINICAL BIOMEDICAL****Title of this Research Study**

The Rural Men's Health Study

**Invitation**

You are invited to take part in this research study. The information in this form is meant to help you decide whether or not to take part. If you have any questions, please ask.

**Why are you being asked to be in this research study?**

You are being asked to be in this study because you are a 40 to 69 year old man, reside in the Northeast Nebraska region, your Body Mass Index (BMI) is 28 or higher (BMI 50 or greater with clinician clearance, less than 396 pounds), you are a smartphone owner with enabled text messaging, you speak and read English, have an email account, you have no health problems that would prevent you from becoming more physically active, and you are willing to share your self-monitoring logs from the Lose-It app with the investigative team.

**What is the reason for doing this research study?**

Rural men are less likely than the general population to receive diet and exercise counseling for weight loss. Men with BMI of 28 to 49 are classified as overweight or obese BMI of 50 or higher is classified as morbidly obese. This population is at increased risk of developing a number of chronic diseases such as insulin resistance, type 2 (adult-onset) diabetes, high blood pressure, heart disease and stroke. The preferred treatment for weight reduction is lifestyle modification that include a diet that is high in fruits, vegetables and low fat dairy products, and regular moderate intensity physical activity supplemented by resistance exercise. This research is trying to see if a technology enhanced self-monitoring approach is effective in increasing healthy eating and physical activity and reducing body weight. A total of 80 participants are expected to enroll in this study.

**What will be done during this research study?**

The study will last for six months. You will be asked to come to meet with a research nurse for an independent meeting at the Northeast Nebraska Public Health Department in Wayne, NE, three times at regular intervals (baseline, 3, 6 months) to complete surveys and physical assessments, which will take approximately 60-90 minutes. The physical assessments will include weight, height, body mass index, blood pressure, and heart rate. The individual contents of your written survey will only be shared with the research team. The surveys will include questions about your

IRBVersion 7

|                                                      |
|------------------------------------------------------|
| IRB<br>Approved 08/21/2019<br>Valid until 08/21/2020 |
|------------------------------------------------------|

health status, your eating and physical activity patterns, and your perceptions about technology.

Immediately after the baseline visit, you will be randomly assigned (as by the roll of a die) in a 1:1 ratio to one of two groups. All subjects will be assigned a temporary email address, that contains no personal identifiers, that will be used to create a Lose-It app account. At the end of the study, you will have the option to choose to obtain personal ownership of your Lose-It account. If you choose to obtain personal ownership of your account, our research staff will assist you in entering a new username and password. However, please be advised that our study will not pay for further access to the Lose-It app. Future access to Lose-It premium will require you pay the current market rate for the app. If you choose to forego a change of ownership, your Lose-It account will be deleted 30 days after completing the study. If you are in group 1, you will have access to Lose-It Premium app, receive daily text messaging, participate in an online social comparison group with other members of group 1, and receive a WiFi Smartscale for daily weighing over the next 6 months. If you are in Group 2, you will have access to the Lose-It Basic app to self-monitor your eating and activity for the next 6 months. Both groups will have access to the research nurse for questions and will receive assessments at 3 and 6 months.

An overview of the procedures you will participate in during the study office visits are outlined in the attached table: Schedule of Procedures.

In addition to the brief questionnaires collected at baseline, 3, and 6 months, you may be randomly invited to participate in a focus group interview (approximately 90 minutes) at the end of the study (3 months) at the same community center where your assessments were collected. The questions for the interviews and focus groups will be: 1) What was the most helpful aspect of this study? 2) What other support would have helped you reach your goals? 3) Other comments. The interviews and focus groups will be recorded and analyzed to determine the major themes. Audio recordings of the focus groups will be destroyed after checked against the written transcripts for accuracy. At the end of the study, your temporary email account and attached Lose-It account will be deleted. You will have the option to set up a new Lose-It Basic account for free if you choose to continue using the app after the completion of the study.

#### **What are the possible risks of being in this research study?**

The possible risks of the procedures for assessing the biomarkers (resting blood pressure and resting heart rate) can be compared to procedures used in routine medical care and/or screens (i.e., blood pressure or heart rate measurement).

IRBVersion 7

|                                                      |
|------------------------------------------------------|
| IRB<br>Approved 08/21/2019<br>Valid until 08/21/2020 |
|------------------------------------------------------|

Assessment of Behavioral Markers:The assessments include no sensitive questions and pose no risks to you beyond possible but unlikely fatigue during completion of the survey. If you become fatigued, you can take a break or complete the assessment on another day.

Assessment of Biomarkers:The likelihood of risks associated with the assessment of all biomarkers is small, and the seriousness of those risks is minimal. The exertion levels are the same as for those associated with routine clinician visit screenings.

Alternative Treatments and Procedures:You can obtain guidance from your primary care provider or follow self-directed programs of behavior change. The assessments provided might be available from health clubs or other facilities, but there would be a cost associated.

Use of smart phone to track physical activity:The risks associated with wearing your smart phone for tracking physical activity are minor discomfort and nuisance from wearing the device on the hip or pocket during waking hours.

Loss of confidentiality is a risk to participating in the study. You may find completing the written surveys and health assessments inconvenient or tiring. The research nurse will schedule all assessment sessions at times convenient for you, and you may call him/her at the number listed at the end of this form to reschedule if necessary. If you become tired before completing the survey or health assessments, you may take a break. Loss of confidentiality or the overreach of the Lose-It app will not have access to any personal identifiable information about you or any other subjects in the study.

You may experience the following risks and discomforts as a result of each part of the physical assessment:

*Resting Blood Pressure:* arm discomfort during the procedure related to compression by the blood pressure cuff.

All of the tests will be administered by an experienced licensed or certified healthcare professional who will provide you with instruction and support during testing.

It is possible that other rare side effects could occur that are not described in this consent form. It is also possible that you could have a side effect that has not occurred before.

IRBVersion 7

|                                                      |
|------------------------------------------------------|
| IRB<br>Approved 08/21/2019<br>Valid until 08/21/2020 |
|------------------------------------------------------|

**What are the possible benefits to you?**

You may learn about weight loss through self-monitoring of healthy eating and physical activity. If you adopt healthier eating and physical activity lifestyle behaviors, you may experience weight loss as well as promote health, prevent disability and/or premature death, and enhance quality of life as you age. You also may benefit from an improvement in cardiorespiratory (heart) fitness, increases in muscular strength, and percent body fat. You may not get any benefit from being in this research study.

**What are the possible benefits to other people?**

Cost-effective interventions that are acceptable to rural men and effective in achieving preventive health behavior change have the potential for decreasing health care costs by preventing chronic diseases and maintaining functional ability. This research protocol may provide a care delivery model that can be used by other providers of primary preventive services to rural clients. There may not be benefits to other people.

**What are the alternatives to being in this research study?**

You might obtain guidance from your primary health care provider about healthy eating and physical activity or follow a self-directed program of lifestyle behavior change for weight loss. The assessments provided might be available to you at health clubs or other facilities, but there would be a cost involved.

**What will being in this research study cost you?**

There is no cost to you to be in this research study. You will not be paid or reimbursed for transportation costs to and from the study site.

**Will you be paid for being in this research study?**

You will not be paid for transportation costs to and from the study site. Your compensation will be determined by the intervention arm to which you are randomly selected. Men in the MT+ intervention arm will receive the Lose-It Premium app (40.00) and a Nokia Body+ Wi-Fi scale (100.00), which they will be able to keep at the end of the study. Men randomized to the MT intervention arm will receive a stipend of \$25 for each of the 3 assessment sessions. To receive payment you must provide your social security number, name, and address in order to comply with Internal Revenue service (IRS) reporting requirements. When payment is reported to the IRS, we will not say what the payment is for, only that you have been paid. If you do not wish to provide this information, you can still participate in the study; however, you will not be paid. Checks will be mailed at the end of 6 months of your participation after your final study visit.

IRBVersion 7

|                                                      |
|------------------------------------------------------|
| IRB<br>Approved 08/21/2019<br>Valid until 08/21/2020 |
|------------------------------------------------------|

**Who is paying for this research?**

This research is being paid for by grant funds from the National Institute for Nursing Research. The University of Nebraska Medical Center College of Nursing receives money from the National Institute for Nursing Research to conduct this study.

**What should you do if you are injured or have a medical problem during this research study?**

If you are injured or have a medical problem as a result of being in this study, you should immediately contact one of the people listed at the end of this consent form.

**How will information about you be protected?**

You have rights regarding the privacy of your medical information collected before and during this research. This medical information, called "protected health information" (PHI), typically may include, depending upon the nature of this research, demographic information (like your address and birth date), the results of physical exams, as well as your medical history.

By signing this consent form, you are allowing the research team to have access to your PHI. The research team includes the investigators listed on this consent form and other personnel involved in this specific study at UNMC. Your PHI will be used only for the purpose(s) described in the section "What is the reason for doing this research study?"

To help us protect your privacy, we have obtained a Certificate of Confidentiality from the National Institutes of Health. The researchers can use this Certificate to legally refuse to disclose information that may identify you in any federal, state, or local civil, criminal, administrative, legislative, or other proceedings, for example, if there is a court subpoena. The researchers will use the Certificate to resist any demands for information that would identify you, except as explained below.

The Certificate cannot be used to resist a demand for information from personnel of the United States Government that is used for auditing or evaluation of federally funded projects or for information that must be disclosed in order to meet the requirements of the federal Food and Drug Administration (FDA).

You should understand that a Certificate of Confidentiality does not prevent you or a member of your family from voluntarily releasing information about yourself or your involvement in this research. If an insurer, employer, or other person obtains your written consent to receive information, then the researchers may not use the Certificate to withhold that information.

IRBVersion 7

|                                                      |
|------------------------------------------------------|
| IRB<br>Approved 08/21/2019<br>Valid until 08/21/2020 |
|------------------------------------------------------|

The Certificate of Confidentiality will not be used to prevent disclosure to state or local authorities of child abuse and neglect, or harm to self or others.

**Who will have access to information about you?**

Your PHI will be shared, as necessary, with the Institutional Review Board (IRB) and with any person or agency required by law. You are also allowing the research team to share your PHI with other people or groups listed below. All of these persons or groups listed below are obligated to protect your PHI.

By signing this consent form, you are allowing the research team to have access to your PHI. The research team includes the investigators listed on this consent form and other personnel involved in this specific study at the Institution.

Your PHI will be used only for the purpose(s) described in the section What is the reason for doing this research study?

You are also allowing the research team to share your PHI, as necessary, with other people or groups listed below:

- The UNMC Institutional Review Board (IRB)
- Institutional officials designated by the UNMC IRB
- Federal law requires that your information may be shared with these groups:
  - The HHS Office of Human Research Protections (OHRP)
  - National Institutes of Health (NIH)

You are authorizing us to use and disclose your PHI for as long as the research study is being conducted. You may cancel your authorization for further collection of PHI for use in this research at any time by contacting the principal investigator in writing. However, the PHI which is included in the research data obtained to date may still be used. If you cancel this authorization, you will no longer be able to participate in this research.

**How will results of the research be made available to you during and after the study is finished?**

The information from this study may be published in scientific journals or presented at scientific meetings but your identity will be kept strictly confidential.

A description of this clinical trial will be available on [www.ClinicalTrials.gov](http://www.ClinicalTrials.gov), as required by U.S. law. This website will not include information that can identify you. At most, the website will include a summary of the results. You can search this website

IRBVersion 7

|                                                      |
|------------------------------------------------------|
| IRB<br>Approved 08/21/2019<br>Valid until 08/21/2020 |
|------------------------------------------------------|

at any time.

**What will happen if you decide not to be in this research study?**

You can decide not to be in this research study. Deciding not to be in this research study will not affect your medical care or your relationship with the investigator, the University of Nebraska Medical Center or the Nebraska Medical Center. Your doctor will still take care of you and you will not lose any benefits to which you are entitled.

**What will happen if you decide to stop participating once you start?**

You can stop being in this research study (withdraw) at any time before, during, or after the treatment begins. Your doctor will still take care of you though you may not be able to get the research treatment. Deciding to withdraw will otherwise not affect your care or your relationship with the investigator, the University of Nebraska Medical Center, or the Nebraska Medical Center. You will not lose any benefits to which you are entitled.

**Will you be given any important information during the study?**

You will be informed promptly if the research team gets any new information during this research study that may affect whether you want to continue being in the study.

**What should you do if you have any questions about the study?**

You have been given a copy of "What do I need to know before being in a research study?" If you have any questions at any time about this study, you should contact the Principal Investigator or any of the study personnel listed on this consent form or any other documents that you have been given.

**What are your rights as a research participant?**

You have rights as a research subject. These rights have been explained in this consent form and in *The Rights of Research Subjects* that you have been given. If you have any questions concerning your rights or want to discuss problems, concerns, obtain information or offer input, or make a complaint about the research, you can contact any of the following:

- The investigator or other study personnel
- Institutional Review Board (IRB) by
- Telephone: (402) 559-6463
- Email: [IRBORA@unmc.edu](mailto:IRBORA@unmc.edu)
- Mail: UNMC Institutional Review Board, 987830 Nebraska Medical Center, Omaha, NE 68198-7830.
- Research subject advocate
- Telephone 402-559-6941

IRBVersion 7

|                                                      |
|------------------------------------------------------|
| IRB<br>Approved 08/21/2019<br>Valid until 08/21/2020 |
|------------------------------------------------------|

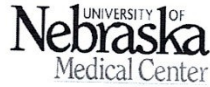

IRB PROTOCOL # 594-17-EP

Page 8 of 9

- Email: unmcrsa@unmc.edu

**Documentation of informed consent**

You are freely making a decision whether to be in this research study. Signing this form means that:

- You have read and understood this consent form.
- You have had the consent form explained to you.
- You have been given a copy of The Rights of Research Subjects
- You have had your questions answered.
- You have decided to be in the research study.
- If you have any questions during the study, you have been directed to talk to one of the investigators listed below on this consent form.
- You will be given a signed and dated copy of this consent form to keep.

Signature of Subject \_\_\_\_\_  
Date \_\_\_\_\_

My signature certifies that all the elements of informed consent described on this consent form have been explained fully to the subject. In my judgment, the subject possesses the legal capacity to give informed consent to participate in this research and is voluntarily and knowingly giving informed consent to participate.

Signature of Person obtaining consent \_\_\_\_\_  
Date \_\_\_\_\_

For peer review only

**Authorized Study Personnel**

**Principal**

\* Eisenhauer, Christine  
phone: 402-844-7897  
alt #: 402-844-7897  
degree: PhD, APRN-CNS

**Secondary**

\* Hageman, Patricia  
phone: 402-559-1967  
alt #: 402-559-1967  
degree: PhD, PT

\* Pullen, Carol  
phone: 402-559-6548  
alt #: 402-559-6548  
degree: Ed.D., RN

\* Silva, Fabiana

\* Yoder, Aaron

IRBVersion 7

|                                                      |
|------------------------------------------------------|
| IRB<br>Approved 08/21/2019<br>Valid until 08/21/2020 |
|------------------------------------------------------|



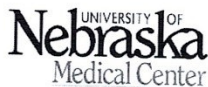

IRB PROTOCOL # 594-17-EP

Page 8 of 9

- Email: unmcrsa@unmc.edu

**Documentation of informed consent**

You are freely making a decision whether to be in this research study. Signing this form means that:

- You have read and understood this consent form.
- You have had the consent form explained to you.
- You have been given a copy of The Rights of Research Subjects
- You have had your questions answered.
- You have decided to be in the research study.
- If you have any questions during the study, you have been directed to talk to one of the investigators listed below on this consent form.
- You will be given a signed and dated copy of this consent form to keep.

Signature of Subject \_\_\_\_\_

Date \_\_\_\_\_

My signature certifies that all the elements of informed consent described on this consent form have been explained fully to the subject. In my judgment, the subject possesses the legal capacity to give informed consent to participate in this research and is voluntarily and knowingly giving informed consent to participate.

Signature of Person obtaining consent \_\_\_\_\_

Date \_\_\_\_\_

For peer review only

**Authorized Study Personnel**

**Principal**

\* Eisenhauer, Christine  
phone: 402-844-7897  
alt #: 402-844-7897  
degree: PhD, APRN-CNS

**Secondary**

\* Hageman, Patricia  
phone: 402-559-1967  
alt #: 402-559-1967  
degree: PhD, PT

\* Pullen, Carol  
phone: 402-559-6548  
alt #: 402-559-6548  
degree: Ed.D., RN

\* Silva, Fabiana

\* Yoder, Aaron

IRBVersion 7

IRB  
Approved 08/21/2019  
Valid until 08/21/2020

phone: 402-559-6627  
alt #: 402-559-6627  
degree: PhD

phone: 402-552-7240  
alt #: 814-577-9127  
degree: PhD

**Participating Personnel**

\* Castaneda, Georgina  
alt #: 402-375-2200  
degree: CHW

\* Miller, Jessica  
phone: 402-844-7923  
alt #: 402-340-4699  
degree: RN, BSN

\* Salinas, Katherine (Katie)  
phone: 402-559-6025  
alt #: 402-255-0504  
degree: RN, BSN

\* Zarate, Victor  
alt #: 402-375-2200  
degree: CHW

For peer review only

IRBVersion 7

IRB  
Approved 08/21/2019  
Valid until 08/21/2020

## Institutional Review Board (IRB)

### What Do I Need To Know Before Being In A Research Study?

You have been invited to be in a **research study**. Research studies are also called "clinical trials" or "protocols." **Research** is an organized plan designed to get new knowledge about a disease or the normal function of the body. The people who are in the research are called **research subjects**. The **investigator** is the person who is running the research study. You will get information from the investigator and the research team, and then you will be asked to give your **consent** to be in the research.

**This sheet will help you think of questions to ask the investigator or his/her staff. You should know all these answers before you decide about being in the research.**

What is the **purpose** of the research? Why is the investigator doing the research?

What are the **risks** of the research? What bad things could happen?

What are the possible **benefits** of the research? How might this help me?

**How is this research different** than the care or treatment I would get if I wasn't in the research? Are there other treatments I could get?

Does **everyone** in this research study get the same treatment?

Will being in the research **cost** me anything extra?

Do I have to be in this research study? Will the doctor still take care of me if I say **no**?

Can I **stop** being in the research once I've started? How?

Who will look at my **records**?

How do I reach the investigator if I have more **questions**?

Who do I call if I have questions about being a **research subject**?

**Make sure all your questions are answered before you decide whether or not to be in this research.**

Academic Research & Services Building 3000 / 987830 Nebraska Medical Center / Omaha NE 68198-7830  
402-559-8463 / FAX 402-559-3300 / Email: irbora@unmc.edu / <http://www.unmc.edu/irb>

Institutional Review Board (IRB)

## THE RIGHTS OF RESEARCH SUBJECTS AS A RESEARCH SUBJECT YOU HAVE THE RIGHT

**to be told everything you need to know about the research before you are asked to decide whether or not to take part in the research study.** The research will be explained to you in a way that assures you understand enough to decide whether or not to take part.

**to freely decide whether or not to take part in the research.**

**to decide not to be in the research, or to stop participating in the research at any time.** This will not affect your medical care or your relationship with the investigator or the Nebraska Medical Center. Your doctor will still take care of you.

**to ask questions about the research at any time.** The investigator will answer your questions honestly and completely.

**to know that your safety and welfare will always come first.** The investigator will display the highest possible degree of skill and care throughout this research. Any risks or discomforts will be minimized as much as possible.

**to privacy and confidentiality.** The investigator will treat information about you carefully, and will respect your privacy.

**... to keep all the legal rights you have now.** You are not giving up any of your legal rights by taking part in this research study.

**to be treated with dignity and respect at all times.**  
The Institutional Review Board is responsible for assuring that your rights and welfare are protected. If you have any questions about your rights, contact the Institutional Review Board at (402) 559-6463.

Academic Research & Services Building 3000 / 987830 Nebraska Medical Center / Omaha NE 68198-7830  
402-559-6463 / FAX 402-559-3300 / Email: irbora@unmc.edu / <http://www.unmc.edu/irb>

32

33

1  
2

# Reporting checklist for protocol of a clinical trial.

4  
5  
6

Based on the SPIRIT guidelines.

8  
9  
10

## Instructions to authors

12  
13

Complete this checklist by entering the page numbers from your manuscript where readers will find

15

51  
52  
53  
54  
55  
56  
57  
58  
59  
60

1  
2  
3  
4  
5  
6  
7

Your article may not currently address all the items on the checklist. Please modify your text to include the missing information. If you are certain that an item does not apply, please write "n/a" and

Upload your completed checklist as an extra file when you submit to a journal.

In your methods section, say that you used the SPIRIT reporting guidelines, and cite them as:

Chan A-W, Tetzlaff JM, Altman DG, Laupacis A, Gøtzsche PC, Krleža-Jerić K, Hróbjartsson A, Mann H, Dickersin K, Berlin J, Doré C, Parulekar W, Summerskill W, Groves T, Schulz K, Sox H, Rockhold FW, Rennie D, Moher D. SPIRIT 2013 Statement: Defining standard protocol items for clinical trials.

16 each of the items listed below.

17  
18  
19  
20  
21  
22  
23

24 provide a short explanation.

51  
52  
53  
54  
55  
56  
57  
58  
59  
60

1  
2  
3  
4  
5  
6  
7  
25  
26  
27  
28  
29  
30  
31  
32  
33  
34  
35  
36  
37  
38  
39

Ann Intern Med. 2013;158(3):200-207

40  
41  
42  
43  
44  
45  
46  
47  
48  
49  
50

Page

Reporting Item

Number

**Administrative**

**information**

|       |                                                                                                                                 |   |
|-------|---------------------------------------------------------------------------------------------------------------------------------|---|
| Title | <a href="#">#1</a> Descriptive title identifying the study design, population, interventions, and, if applicable, trial acronym | 1 |
|-------|---------------------------------------------------------------------------------------------------------------------------------|---|

51  
52  
53  
54  
55  
56  
57  
58  
59  
60

1  
2  
3  
4  
5  
6  
7

Trial registration [#2a](#) Trial identifier and registry name. If not yet registered,  
name of intended registry 2

8

set [#2b](#) All items from the World Health Organization Trial 2

9  
10  
11

Protocol version [#3](#) Date and version identifier 2

12  
13  
14

51  
52  
53  
54  
55  
56  
57  
58  
59  
60



1  
2  
3  
4  
5  
6  
7  
15  
16  
17  
18  
19  
20  
21  
22  
23  
24  
25  
26  
27  
28  
29  
30  
31  
32  
33  
34  
35  
36  
37  
38  
39  
40  
41  
42  
43  
51  
52  
53  
54  
55  
56  
57  
58  
59  
60

Funding2

#4 Sources and types of financial, material, and other support

#5a Names, affiliations, and roles of protocol contributors

Roles and 2

responsibilities:

contributorship

#5b Name and contact information for the trial sponsor

Roles and 2

responsibilities:

sponsor contact

#5c Role of study sponsor and funders, if any, in study design; collection, management, analysis, and interpretation of data; writing of the report; and the decision to submit the report for publication, including whether they will have

information

Roles and 11

responsibilities:

sponsor and funder

1  
2  
3  
4  
5  
6  
7  
44  
45 ultimate authority over any of these activities  
46  
47

48 Roles and [#5d](#) Composition, roles, and responsibilities of the coordinating 11  
49

50 responsibilities: centre, steering committee, endpoint adjudication committees

committee, data management team, and other individuals

or groups overseeing the trial, if applicable (see Item 21a  
for data monitoring committee)

## Introduction

Background and [#6a](#) Description of research question and justification for 3  
rationale

undertaking the trial, including summary of relevant studies

(published and unpublished) examining benefits and harms

8  
9  
10  
11  
12 for each intervention  
13  
14

1  
2  
3  
4  
5  
6  
7

15 Background and 3 #6b Explanation for choice of comparators

16  
17 rationale: choice of  
18  
19 comparators

20 #7 Specific objectives or hypotheses

21  
22 Objectives3-4

23 #8 Description of trial design including type of trial (eg, parallel  
24 group, crossover, factorial, single group), allocation ratio,  
25 Trial design4 and framework (eg, superiority, equivalence, non-inferiority,  
26  
27 exploratory)

For peer review only

30  
31  
32  
33  
34

35 **Methods:**

36  
37

38 **Participants,**

39

40 **interventions, and**

41

42 **outcomes**

43  
44

51

52

53

54

55

56

57

58

59

60

1  
2  
3  
4  
5  
6  
7

45 Study setting [#9](#) Description of study settings (eg, community clinic, 4  
46 academic hospital) and list of countries where data will be  
47 collected. Reference to where list of study sites can be  
48 obtained  
49  
50

Eligibility criteria [#10](#) Inclusion and exclusion criteria for participants. If 4  
applicable, eligibility criteria for study centres and  
individuals who will perform the interventions (eg, surgeons,  
psychotherapists)

Interventions: [#11a](#) Interventions for each group with sufficient detail to allow 5  
8 description replication, including how and when they will be  
9 administered  
10  
11

14 Interventions: [#11b](#) Criteria for discontinuing or modifying allocated 5  
15 modifications interventions for a given trial participant (eg, drug dose  
16  
17

51  
52  
53  
54  
55  
56  
57  
58  
59  
60

1  
2  
3  
4  
5  
6  
7  
18  
19  
20  
21  
22  
23  
24  
25  
26  
27  
28  
29  
30  
31  
32  
33  
34  
35  
36  
37  
38  
39  
40  
41  
42  
43  
44  
45  
51  
52  
53  
54  
55  
56  
57  
58  
59  
60

change in response to harms, participant request, or

improving / worsening disease)

Interventions: [#11c](#) Strategies to improve adherence to intervention protocols, 5,6  
adherence and any procedures for monitoring adherence (eg, drug  
tablet return; laboratory tests)

Interventions: [#11d](#) Relevant concomitant care and interventions that are 5  
concomitant care permitted or prohibited during the trial

Outcomes [#12](#) Primary, secondary, and other outcomes, including the 6  
specific measurement variable (eg, systolic blood  
pressure), analysis metric (eg, change from baseline, final  
value, time to event), method of aggregation (eg, median,

1  
2  
3  
4  
5  
6  
7  
46  
47  
48  
49  
50  
  
8  
9  
10  
11  
12  
13  
  
51  
52  
53  
54  
55  
56  
57  
58  
59  
60

proportion), and time point for each outcome. Explanation of the clinical relevance of chosen efficacy and harm outcomes is strongly recommended

|                      |                     |                                                                                                                                                                                       |     |
|----------------------|---------------------|---------------------------------------------------------------------------------------------------------------------------------------------------------------------------------------|-----|
| Participant timeline | <a href="#">#13</a> | Time schedule of enrolment, interventions (including any run-ins and washouts), assessments, and visits for participants. A schematic diagram is highly recommended (see Figure)      | 7   |
| Sample size          | <a href="#">#14</a> | Estimated number of participants needed to achieve study objectives and how it was determined, including clinical and statistical assumptions supporting any sample size calculations | 3-4 |

1  
2  
3  
4  
5  
6  
7

reach target sample size

**#16a** Method of generating the allocation sequence (eg, computer-generated random numbers), and list of any factors for stratification. To reduce predictability of a random sequence, details of any planned restriction (eg, blocking) should be provided in a separate document that is unavailable to those who enrol participants or assign interventions

14 Recruitment **#16b** Mechanism of implementing the allocation sequence (eg, **#15** Strategies for achieving adequate participant enrolment to 4,7

15  
16  
17  
18

19 **Methods: Assignment**

20

51  
52  
53  
54  
55  
56  
57  
58  
59  
60

1  
2  
3  
4  
5  
6  
7

21 of interventions (for

22  
23

24 controlled trials)

25  
26

27 Allocation: sequence 3,7

28

29 generation

30  
31  
32  
33  
34  
35  
36  
37  
38  
39  
40  
41  
42

43

Allocation 7

44  
45

46 concealment

central telephone; sequentially numbered, opaque, sealed

47

48 mechanism

envelopes), describing any steps to conceal the sequence

49

50

until interventions are assigned

51  
52  
53  
54  
55  
56  
57  
58  
59  
60



1  
2  
3  
4  
5  
6  
7

Allocation: [#16c](#) Who will generate the allocation sequence, who will enrol 6-7  
implementation participants, and who will assign participants to  
interventions

Blinding (masking) [#17a](#) Who will be blinded after assignment to interventions (eg, 7  
trial participants, care providers, outcome assessors, data analysts),  
and how

8

Blinding (masking): [#17b](#) If blinded, circumstances under which unblinding is 7  
emergency permissible, and procedure for revealing a participant's

13

51  
52  
53  
54  
55  
56  
57  
58  
59  
60

1  
2  
3  
4  
5  
6  
7  
14 unblinding allocated  
intervention during the trial

## 17 **Methods: Data**

18  
19 **collection,**

20  
21 **management, and**

22  
23  
24 **analysis**

#18a Plans for assessment and collection of outcome, baseline, and other trial data, including any related processes to promote data quality (eg, duplicate measurements, training of assessors) and a description of study instruments (eg, questionnaires, laboratory tests) along with their reliability and validity, if known. Reference to where data collection forms can be found, if not in the protocol

#18b Plans to promote participant retention and complete follow-

51  
52  
53  
54  
55  
56  
57  
58  
59  
60

1  
2  
3  
4  
5  
6  
7

Data collection plan: 9-10

43  
44  
45  
46  
47  
48  
49  
50

retention up, including list of any outcome data to be collected for participants who discontinue or deviate from intervention protocols

Data management [#19](#) Plans for data entry, coding, security, and storage, 10-11 including any related processes to promote data quality (eg, double data entry; range checks for data values). Reference to where details of data management procedures can be found, if not in the protocol

Statistics: outcomes [#20a](#) Statistical methods for analysing primary and secondary 10 outcomes. Reference to where other details of the statistical analysis plan can be found, if not in the protocol

8  
9  
10  
11  
12  
13

51  
52  
53  
54  
55  
56  
57  
58  
59  
60

1  
2  
3  
4  
5  
6  
7  
14 Statistics: additional

adjusted analyses)

**#20c** Definition of analysis population relating to protocol non-adherence (eg, as randomised analysis), and any statistical methods to handle missing data (eg, multiple imputation)

**#21a** Composition of data monitoring committee (DMC); summary of its role and reporting structure; statement of whether it is independent from the sponsor and competing interests; and reference to where further details about its charter can be found, if not in the protocol. Alternatively, an explanation of why a DMC is not needed

**#20b** Methods for any additional analyses (eg, subgroup and

10

15  
16 analyses

17  
18  
19 Statistics: analysis 10  
20  
21  
22  
23  
24  
25  
26  
27  
28  
29  
30  
31  
32  
33  
34  
35  
36  
37  
38  
39  
40  
41  
42  
43  
44  
45  
46  
47  
48  
49  
50

1  
2  
3  
4  
5  
6  
7

21 population and

22  
23

24 missing data

25  
26

27 **Methods: Monitoring**

28  
29

Data monitoring: 11

30  
31

32 formal committee

33  
34  
35  
36  
37  
38  
39  
40  
41  
42  
43

44 Data monitoring: [#21b](#) Description of any interim analyses and stopping 11

45  
46

47 interim analysis guidelines, including who will have access to these interim

48  
49

results and make the final decision to terminate the trial

50

51  
52  
53  
54  
55  
56  
57  
58  
59

60

1  
2  
3  
4  
5  
6  
7

Harms [#22](#) Plans for collecting, assessing, reporting, and managing 11  
solicited and spontaneously reported adverse events and  
other unintended effects of trial interventions or trial conduct

Auditing [#23](#) Frequency and procedures for auditing trial conduct, if any, 11  
and whether the process will be independent from  
investigators and the sponsor

8  
9  
10  
11  
12  
13

**Ethics and**

51  
52  
53  
54  
55  
56  
57  
58  
59  
60

1  
2  
3  
4  
5  
6  
7

14 **dissemination**

15  
16

17 Research ethics 11 #24 Plans for seeking research ethics committee / institutional  
18 review board (REC / IRB) approval

19 approval

20  
21

#25 Plans for communicating important protocol modifications  
(eg, changes to eligibility criteria, outcomes, analyses) to

22  
23

Protocol 11

relevant parties (eg, investigators, REC / IRBs, trial

24

25 amendments

participants, trial registries, journals, regulators)

26  
27

#26a Who will obtain informed consent or assent from potential  
trial participants or authorised surrogates, and how (see

28  
29

30 Consent or assent7

Item 32)

31  
32

33  
34

#26b Additional consent provisions for collection and use of  
participant data and biological specimens in ancillary

35  
36

37  
38

39  
40

Consent or assent: n/a

41  
42

ancillary studies 43 44 studies, if applicable

45  
46

51  
52

53  
54

55  
56

57  
58

59  
60

1  
2  
3  
4  
5  
6  
7  
47  
48  
49  
50  
8  
9  
10  
11  
12  
13

|                    |                     |                                                                                                                                                                                      |    |
|--------------------|---------------------|--------------------------------------------------------------------------------------------------------------------------------------------------------------------------------------|----|
| Confidentiality    | <a href="#">#27</a> | How personal information about potential and enrolled participants will be collected, shared, and maintained in order to protect confidentiality before, during, and after the trial | 11 |
| Declaration of     | <a href="#">#28</a> | Financial and other competing interests for principal investigators for the overall trial and each study site                                                                        | 12 |
| Data access        | <a href="#">#29</a> | Statement of who will have access to the final trial dataset, and disclosure of contractual agreements that limit such access for investigators                                      | 11 |
| Ancillary and post | <a href="#">#30</a> | Provisions, if any, for ancillary and post-trial care, and for                                                                                                                       | 11 |

51  
52  
53  
54  
55  
56  
57  
58  
59  
60



1  
2  
3  
4  
5  
6  
7

14 trial

care

compensation to those

who

suffer harm from trial

participation

15  
16  
17  
18

#31a Plans for investigators and sponsor to communicate trial results to participants, healthcare professionals, the public, and other relevant groups (eg, via publication, reporting in results databases, or other data sharing arrangements), including any publication restrictions

19 Dissemination policy: 11

20

21 trial results

22  
23  
24

#31b Authorship eligibility guidelines and any intended use of professional writers

For peer review only

25  
26  
27  
28  
29  
30

#31c Plans, if any, for granting public access to the full protocol, participant-level dataset, and statistical code

31 Dissemination policy: 11

32  
33

34 authorship

35  
36

Dissemination policy: 11

37  
38

39 reproducible research

40  
41

51  
52  
53  
54  
55  
56  
57  
58  
59

1  
2  
3  
4  
5  
6  
7

## 42 Appendices

43  
44  
45  
46  
47  
48  
49

Informed consent [#32](#) Model consent form and other related documentation given 22-28  
materials to participants and authorised surrogates

50

Biological specimens [#33](#) Plans for collection, laboratory evaluation, and storage of n/a  
biological specimens for genetic or molecular analysis in  
the current trial and for future use in ancillary studies, if  
applicable

51  
52  
53  
54  
55  
56  
57  
58  
59  
60

- 1 The SPIRIT checklist is distributed under the terms of the Creative Commons Attribution License
- 2 CCBY-ND 3.0. This checklist was completed on 17. October 2019 using
- 3 <https://www.goodreports.org/>, a tool made by the [EQUATOR Network](#) in collaboration with
- 4 [Penelope.ai](#)

Forpeerreviewonly

5
